1 **TITLE**

2 **SCRINSHOT, a spatial method for single-cell resolution mapping of cell states in tissue**  
3 **sections**

4

5 **Authors**

6 Alexandros Sountoulidis<sup>1,2‡</sup>, Andreas Lontos<sup>1,2</sup>, Hong Phuong Nguyen<sup>1,2</sup>, Alexandra B. Firsova<sup>1,2</sup>,  
7 Athanasios Fysikopoulos<sup>3</sup>, Xiaoyan Qian<sup>1,4</sup>, Werner Seeger<sup>3</sup>, Erik Sundström<sup>5</sup>, Mats Nilsson<sup>1,4</sup>  
8 and Christos Samakovlis<sup>1,2,3‡</sup>

9 <sup>1</sup>Science for Life Laboratory, Solna, Sweden

10 <sup>2</sup> Department of Molecular Biosciences, Wenner-Gren Institute, Stockholm University, Stockholm,  
11 Sweden

12 <sup>3</sup> Molecular Pneumology, Cardiopulmonary Institute, Justus Liebig University, Giessen, Germany

13 <sup>4</sup> Department of Biochemistry and Biophysics, Stockholm University, Stockholm, Sweden

14 <sup>5</sup> Department of Neurobiology, Care Sciences and Society, Karolinska Institutet, Stockholm,  
15 Sweden

16

17 ‡ Corresponding authors: Christos Samakovlis ([christos.samakovlis@scilifelab.se](mailto:christos.samakovlis@scilifelab.se)), Alexandros  
18 Sountoulidis ([alexandros.sountoulidis@scilifelab.se](mailto:alexandros.sountoulidis@scilifelab.se))

19

20 Keywords: SCRINSHOT, padlock-probe, multiplex RNA FISH, spatial cell-type map, lung

21

22

23 **Abstract**

24 Changes in cell identities and positions underlie tissue development and disease progression.  
25 Although, single-cell mRNA sequencing (scRNA-Seq) methods rapidly generate extensive lists of  
26 cell-states, spatially resolved single-cell mapping presents a challenging task. We developed  
27 SCRINSHOT (Single Cell Resolution IN Situ Hybridization On Tissues), a sensitive, multiplex  
28 RNA mapping approach. Direct hybridization of padlock probes on mRNA is followed by  
29 circularization with SplintR ligase and rolling circle amplification (RCA) of the hybridized padlock  
30 probes. Sequential detection of RCA-products using fluorophore-labeled oligonucleotides profiles  
31 thousands of cells in tissue sections. We evaluated SCRINSHOT specificity and sensitivity on  
32 murine and human organs. SCRINSHOT quantification of marker gene expression shows high  
33 correlation with published scRNA-Seq data over a broad range of gene expression levels. We  
34 demonstrate the utility of SCRINSHOT by mapping the locations of abundant and rare cell types  
35 along the murine airways. The amenability, multiplexity and quantitative qualities of SCRINSHOT  
36 facilitate single cell mRNA profiling of cell-state alterations in tissues under a variety of native and  
37 experimental conditions.

38

39

40

41

42

43

44

45

## 46 INTRODUCTION

47 Recent advances in single-cell RNA sequencing technologies (scRNA-Seq) enabled  
48 transcriptome analysis of individual cells and the identification of new cellular states in healthy  
49 and diseased conditions (1). These methods however fail to capture the spatial cellular  
50 organization in tissues due to cell dissociation. New spatial transcriptomic methods aim to  
51 circumvent the problem of lost cellular topology (2). They can be divided into two categories: First,  
52 targeted methods that directly detect specific mRNAs with single-cell resolution like ISS (3),  
53 MERFISH (4), osmFISH (5) and second global methods, which are based on barcode annotated  
54 positions and next generation sequencing to resolve RNA topology. The spatial resolution of  
55 global methods is still larger than the typical cellular dimensions (6, 7).

56 Targeted methodologies are based on nucleic acid probes (mainly DNA), complementary to the  
57 RNA species of interest, as in all *in situ* hybridization assays (8). Single-molecule fluorescence *in*  
58 *situ* hybridization (smFISH) is the most powerful among the spatial transcriptomic methods and  
59 has been used to supplement scRNA-Seq data with spatial information. It utilizes multiple  
60 fluorophore-labeled probes, which recognize the same RNA molecule along its length and  
61 visualize single RNA molecules as bright fluorescent dots (9, 10). Nonetheless, this method still  
62 retains some limitations such as low signal-to-noise ratio, reduced sensitivity on short transcripts,  
63 false positive signal due to unspecific-binding of the labeled probes and low capacity for multiplex  
64 detection of many RNA molecules (11-13). Multiplex detection with smFISH was initially  
65 addressed by the sequential fluorescence *in situ* hybridization (seqFISH) (14, 15) and the  
66 multiplexed error-robust FISH (MERFISH) (4). These approaches utilize sequential rounds of  
67 hybridization of FISH probes or barcode-based primary probes to detect multiple RNA species.  
68 The outstanding throughput of these methods makes them strong candidates for generation of  
69 spatial transcriptome maps in tissues. However, since the principle of these techniques is similar  
70 to smFISH, they require large number of gene-specific probes, confocal or super-resolution

71 microscopy to deconvolve the signals and complicated algorithms for both probe design and  
72 analysis. Nevertheless, the low signal-to-noise ratio still remains a major technical challenge of  
73 these methods, especially for tissue sections with strong auto-fluorescence from structural  
74 extracellular matrix components like collagen and elastin (16). New strategies for signal  
75 amplifications, such as branched-DNA amplification (RNAScope) (17) and hybridization chain  
76 reaction (18, 19), have been recently combined with sophisticated probe design (AmpFISH) (20)  
77 to increase sensitivity and specificity of smFISH.

78 Padlock probes have been successfully used to detect RNA species (21). They are linear DNA  
79 molecules, with complementary arms to the target mRNA sequence and a common “backbone”.  
80 Upon hybridization with the target sequence, they can be ligated, creating circular single-stranded  
81 DNA molecules, which are used as templates for signal amplification using  $\Phi$ 29 polymerase-  
82 mediated rolling circle amplification (RCA) (22). RCA products are large single stranded DNA  
83 molecules containing hundreds of copies (23) of the complementary padlock-probe sequence.  
84 They can be detected with fluorophore labelled oligos, which recognize either their RNA-specific  
85 sequence or their backbone. Because each RCA-product contains hundreds of repeats of the  
86 same detected sequence, the signal-to-noise ratio increases significantly, facilitating signal  
87 detection by conventional epifluorescence microscopy. Also, multiplexity has been integrated into  
88 the method by sequencing by ligation (24, 25). Since commercial ligases such as T4 DNA ligase,  
89 T4 RNA ligase 2 and Ampligase show low activity on DNA/RNA hybrids, RNA has to be reverse-  
90 transcribed to cDNA fragments before introducing padlock probes (3). However, cDNA synthesis  
91 on fixed tissue sections is a challenging and expensive procedure (26), prompting new elegant  
92 approaches trying to circumvent reverse-transcription by introducing Click-chemistry to ligate  
93 DNA probes after hybridization on their RNA targets (ClampFISH (27)). More recently, “H-type”  
94 DNA probes, which are hybridized to both RNA and padlock probes (PLISH (28)), or SNAIL-

95 design probes have been successfully used to facilitate intramolecular ligation of the padlock  
96 probes (STARmap (25)).

97 PBVC-1 DNA ligase (also known as SplintR ligase) shows strong ligase activity of DNA  
98 sequences in DNA/RNA hybrids. This enzyme is a DNA ligase encoded by *Paramecium bursaria*  
99 *Chlorella* virus 1, first discovered by Ho et al.,(29). A number of studies have successfully applied  
100 SplintR ligase for RNA species detection in cultured cells (26, 30-32). However, the fidelity of  
101 SplintR ligation in end-joining is questionable because it tolerates mismatches at the padlock  
102 probe junction and its usefulness is debated. In addition, SplintR ligase shows 1% of its ligation  
103 activity on a 1-nucleotide gap of a nicked duplex DNA substrate (26, 33).

104 We present SCRINSHOT an optimized protocol for multiplex RNA *in situ* detection on  
105 paraformaldehyde-fixed (PFA) tissue sections. We validated the sensitivity, specificity and  
106 multiplexity of SCRINSHOT and showed that it is quantitative over a broad range of gene  
107 expression levels. It is based on the *in situ* sequencing protocol (3) but bypasses the costly and  
108 inefficient reverse transcription on fixed tissue to gain higher detection efficiency, by utilizing  
109 SplintR ligase. To minimize false positive artifacts, we utilized 40nt long target-specific sequences  
110 in the padlock probes in combination with stringent hybridization conditions. SCRINSHOT  
111 performs on a variety of tissues including lung, kidney and heart and readily detects several  
112 epithelial, endothelial and mesenchymal cells. We tested the multiplexing of SCRINSHOT on  
113 mouse and human tissue sections, by simultaneous detection of characterized cell-type-selective  
114 markers. SCRINSHOT successfully identified distinct cell-types and helped to create spatial maps  
115 of large tissue areas at single cell resolution.

## 116 **RESULTS AND DISCUSSION**

### 117 **SCRINSHOT overview**

118 SCRINSHOT evolved from our attempts to improve the detection sensitivity and reduce the cost  
119 of the *in situ* sequencing method, using PFA-fixed material. PFA fixation significantly improves  
120 the histology but makes RNA less accessible to enzymes and padlock probes (24, 26). We  
121 focused on stringent padlock probe hybridization to RNA targets and omitted the inefficient *in situ*  
122 cDNA synthesis step (Figure 1 and Supplementary Figure 1). Gene-specific padlock probes are  
123 first directly hybridized to 40nt long, unique sequences on the mRNA targets. Upon ligation of  
124 bound padlock probes, we amplify the padlock probe sequence using  $\Phi$ 29 polymerase dependent  
125 rolling cycle amplification. RCA products are subsequently detected by fluorophore-labelled oligos  
126 which recognize the gene specific part of the padlock, as previously described (3). Multiplexity is  
127 reduced compared to sequencing by ligation (24), which theoretically allows the detection of 256  
128 transcript species in 4 hybridization runs, or to other barcode based approaches (4, 26). To  
129 increase the number of detected genes we used sequential hybridization cycles of fluorophore-  
130 labelled, uracil-containing oligos. After each detection cycle, fluorescent probes are removed by  
131 enzymatic fragmentation by uracil-N-glycosylase (UNG) and stringent washes. Sequential  
132 detection also enables the separate detection of low, medium and high abundant RNA species,  
133 increasing the dynamic range of detection (34). Our detection probes were each labelled by one  
134 of three commonly-used fluorophores and allowed up to 10 hybridization and imaging cycles,  
135 typically detecting 30 genes. After image acquisition, we utilized manual segmentation of nuclei  
136 and open access analysis tools for image stitching and signal quantification to construct a simple  
137 pipeline for quantitative mapping of expression counts for 20-30 genes to thousands of cells on  
138 tissue sections. The detailed protocol starting with tissue fixation and leading to mapping is  
139 presented in the “Additional File 1”.

140

141 **SCRINSHOT specificity depends on stringent hybridization of the padlock probe**

142 The specificity of SCRINSHOT crucially relies on the specific targeting of the SplintR ligation  
143 activity to the correct sites of the interrogated mRNA. A recent study (33) reported that the fidelity  
144 of this ligase is poor as it tolerates mismatches at padlock probe junctions. In addition, SplintR  
145 shows 1% of its ligation activity on a 1-nucleotide gap of a nicked duplex DNA substrate and it is  
146 unable to join ends across a 2-nucleotide gap (35). These results question the specificity of  
147 SplintR ligase-based methods for *in situ* RNA detection. We reasoned that the choice of padlocks  
148 with high melting points ( $T_m$  around 70°C) followed by stringent washes after DNA/RNA  
149 hybridization would circumvent SplintR promiscuity. We tested the dependence of SCRINSHOT  
150 signals on the hybridization and ligation steps of the padlock, by generating mutant padlocks,  
151 predicted to affect either the hybridization of the 3' padlock arm or the sequence of the ligation  
152 site. The 3'-scrambled arm of this padlock is expected to fail in hybridizing with the *Scgb1a1*  
153 mRNA, resulting in a linear, unligated padlock and therefore in a block in RCA. The single  
154 mismatch probe contains a single replaced nucleotide at the ligation site in 5'-end (C to G). This  
155 substitution was designed to address the effect of promiscuous ligation on the signal. In the same  
156 experiment, we included a slide, where we omitted the SplintR ligase from the reaction mixture to  
157 test whether padlock hybridization alone is sufficient to generate some RCA (SplintR<sup>neg</sup>; Figure 2  
158 D, D'). In all tested conditions we also used the *Actb* normal padlock probe. This transcript was  
159 detected at similar levels in all slides and served as a control for the reactions with the mutated  
160 padlocks. We first counted the dots of *Scgb1a1* and *Actb* signals in all airway cells of sequential  
161 lung tissue sections and plotted their ratios at the different conditions (Figure 2). The signal from  
162 single-mismatch padlock probe was reduced by 20%, compared to the normal *Scgb1a1* probe  
163 demonstrating the low SplintR fidelity for the sequence of the ligation site (Figure 2 B, B', E). The  
164 *Scgb1a1* signal was lost when we used the 3'-scrambled padlock, indicating that padlock probe  
165 hybridization is necessary for circularization and subsequent RCA (Figure 2 C, C', E). The

166 omission of SplintR from the ligation mixture resulted in undetectable signal for both *Scgb1a1* and  
167 *Actb* indicating the central role of ligation in signal amplification (Figure 2 D, D', E). We noticed  
168 that the *Scgb1a1* signal showed significant crowding and a potential saturation leading to  
169 underestimation of the total number of RCA-products for this highly expressed gene (see below).  
170 This crowding was evident even when we added 5-fold less *Scgb1a1* padlock probe (0.01  $\mu$ M) to  
171 the reactions in comparison to all other padlock probes. In an attempt to more accurately quantify  
172 the differences between the signals from normal and mutated padlocks we measured the overall  
173 fluorescence intensity (Raw Integrated Density) of the airway cell-ROIs. This showed that the  
174 single mismatch at the ligation site of *Scgb1a1* padlock probe causes 3-fold fluorescence signal  
175 reduction arguing that the *in situ* SplintR activity is substantially reduced, but not abolished by  
176 single nucleotide substitutions at the ligation site (Figure 2F). We conclude that the specificity of  
177 SCRINSHOT assay is largely provided by the hybridization stringency of the padlock probes,  
178 since SplintR is unable to ligate off-target padlock probes, but can ligate single-mismatch probes  
179 with low efficiency.

180

### 181 **A *Scgb1a1* antisense oligonucleotide competes with padlock probe hybridization and** 182 **signal detection**

183 If the padlock hybridization is the critical step for signal generation then competition by an  
184 oligonucleotide, which recognizes the binding to the mRNA is expected to proportionally reduce  
185 the detected RCA signal. We used the *Scgb1a1* and *Actb* padlocks together with increasing  
186 concentrations of a competing, unlabeled oligonucleotide complementary to the mRNA sequence  
187 recognized by the *Scgb1a1* padlock. Inclusion of the competitor reduced the *Scgb1a1* signal, in  
188 a dose-dependent manner. Equal molar ratios of padlock probe and competitor caused signal  
189 reduction by 10-fold and the signal was eliminated when 5-fold excess of the competitor was used  
190 (Figure 3). This suggests that the SCRINSHOT signal is proportional to the target expression



191 levels because it can be proportionally competed with increasing concentrations of a synthetic  
192 oligo masking the hybridization site. It also highlights the importance of proper padlock design to  
193 achieve similarly high T<sub>m</sub> values and hybridizations conditions for the different probes.

194

### 195 **Application of SCRINSHOT in other organs**

196 To evaluate SCRINSHOT applicability to other tissues, we performed the assay using PFA-fixed  
197 sections from adult mouse kidney and heart and human embryonic lung. On murine tissues, we  
198 used a common panel of padlocks targeting validated lung cell type markers. We targeted *Actb*  
199 as a generic marker, *Pecam1* as an endothelial cell marker, *Scgb1a1* as a club cell marker, *Sftpc*  
200 and *Napsa* as alveolar epithelial type II (AT2) cell markers and *Lyz2*, as a marker for AT2 cells,  
201 macrophages and neutrophils (36). As expected, *Actb* was uniformly expressed in kidney and  
202 heart while *Scgb1a1* and *Sftpc* were undetectable (Supplementary Figure 2 A, B). In both tissues,  
203 *Lyz2* was expressed by a few scattered cells, which presumably correspond to macrophages (37,  
204 38) (Supplementary Figure 2). In a subset of kidney tubular structures, we detected *Napsa*  
205 (Supplementary Figure 2 A), which agrees with the previously described immunohistochemical  
206 detection of the marker in renal proximal tubule cells (39). In the vessel walls of the heart, we  
207 detected sparse signal for the endothelial cell marker *Pecam1* but the myocardial cells were  
208 negative for the marker (Supplementary Figure 2 B). In the human embryonic lung sections, we  
209 used probes targeting transcripts encoding 3 transcription factors, *SOX2*, *SOX9* and *ASCL1*  
210 (Supplementary Figure 3), which have previously been detected by antibody staining in subsets  
211 of epithelial cells (40, 41). In agreement with the published results, the SCRINSHOT signal for  
212 *SOX2* was confined mainly in the proximal part of the branching epithelium, whereas *SOX9* was  
213 selectively expressed in the distal tips. *ASCL1* expression overlapped with *SOX2* (Supplementary  
214 Figure 3). These experiments show that SCRINSHOT can be readily applied to map cell-type  
215 heterogeneity in a variety of tissues.

216

217 **SCRINSHOT generates quantitative gene expression profiles in single cells**

218 We first tested the quantitative power of SCRINSHOT by correlating its detection performance  
219 with the fluorescence of a transgenic red fluorescent protein (RFP) in mouse lung tissue sections.  
220 In the *Sftpc-CreER;Rosa-Ai14* reporter mouse, the RFP expression is activated in AT2 cells, upon  
221 Tamoxifen induction of the Cre recombinase (42). Cre recombines out a  
222 transcriptional/translational STOP cassette (43) of the *Rosa26* locus and allows RFP protein  
223 expression and fluorescence in AT2 cells (44). We injected pups with Tamoxifen on postnatal day  
224 1 (P1) and analyzed the lungs on day P21. In the same experiment, we also used lungs from  
225 *Sftpc-CreER<sup>neg</sup>-Rosa-Ai14<sup>pos</sup>* mice sacrificed at P21 and lungs from *wild type* mice sacrificed at  
226 P60 as controls for the RFP induction and the potential effects of tissue autofluorescence in young  
227 and fully developed lungs.

228 We first analyzed 14167 *Sftpc-CreER<sup>pos</sup>-Rosa-Ai14<sup>pos</sup>* cells and found a reliable correlation  
229 ( $R^2=0.7233$ ) between the endogenous RFP fluorescence and the SCRINSHOT-detected *RFP*  
230 mRNA molecules in each cell (Figure 4 B). By contrast, there was no correlation between *RFP*  
231 SCRINSHOT signal and the endogenous fluorescence ( $R^2=0.0671$ ) in 3355 *Sftpc-CreER<sup>neg</sup>-*  
232 *Rosa-Ai14<sup>pos</sup>* cells. As expected, in the 1008 analyzed *wild type* cells, the correlation of RFP  
233 fluorescence and SCRINSHOT dots was very low. Upon closer inspection most of the signal in  
234 this lung was due to high auto-fluorescence from red blood cells, illustrating the specificity of  
235 SCRINSHOT (Figure 4 A, B).

236 Considering that the *Sftpc-CreER;Rosa-Ai14* reporter specifically labels the alveolar AT2 cells  
237 (42), we used SCRINSHOT to identify the *Sftpc<sup>pos</sup>* AT2 cells and analyze their RFP expression in  
238 both RNA (SCRINSHOT) and protein fluorescence (Raw Integrated Density) level (Figure 5 A, B,  
239 D). In *Sftpc-CreER<sup>pos</sup>* cells the mean number of SCRINSHOT detected *RFP* mRNA molecules  
240 was 6-fold higher compared to *Sftpc-CreER<sup>neg</sup>* cells. In the same comparison the RFP

241 endogenous fluorescence was 5-fold higher. In *wild type* cells, the SCRINSHOT *RFP* signal was  
242 hardly detectable. We observed a slight increase in RFP fluorescence, in *wild type* cells compared  
243 to the ones from the *Sftpc-CreER<sup>neg</sup>* mouse, presumably due to different levels of tissue  
244 autofluorescence depending on developmental stage and fixation time of the tissues (4 hours for  
245 P21 *Sftpc-CreER* and 8 hours for *wild type* P60).

246 Apart from the AT2 cells, the lung alveolus contains additional cells types, including endothelial,  
247 inflammatory, epithelial AT1 cells and fibroblasts (45). In the *Sftpc-CreER<sup>pos</sup>-Rosa-Ai14<sup>pos</sup>* lung,  
248 AT2 cells should be both *RFP<sup>pos</sup>* and *Sftpc<sup>pos</sup>* whereas the rest should be *RFP<sup>neg</sup>*. To evaluate the  
249 specificity and sensitivity of SCRINSHOT in the strict context of a transgenic, knock-in marker  
250 expression, we analyzed the *Sftpc* signal in *RFP<sup>pos</sup>* and *RFP<sup>neg</sup>* alveolar cells and the  
251 SCRINSHOT *RFP* signal in *Sftpc<sup>pos</sup>* and *Sftpc<sup>neg</sup>* alveolar cells from the *Sftpc-CreER<sup>pos</sup>-Rosa-*  
252 *Ai14<sup>pos</sup>* mouse. Both genes are highly expressed, therefore we applied a threshold of 3 dots/cell  
253 to score a cell as positive (see also Supplement for details on setting detection thresholds). Of  
254 the 1429 analyzed *RFP<sup>pos</sup>* cells only 1.1% did not express *Sftpc* and were thus scored as false  
255 negatives. Among the 6848 *RFP<sup>neg</sup>* cells, 7.4% were positive for *Sftpc* and were considered as  
256 false positives. Conversely, we failed to detect *RFP* signal in 4% of the 1679 analyzed *Sftpc<sup>pos</sup>*  
257 cells and counted them as false negatives. Among the *Sftpc<sup>neg</sup>* cells 7% scored as positive for  
258 SCRINSHOT *RFP* signal and were designated as false positives (Figure 5 C, D). Thus, the levels  
259 of false positive and false negative cell annotations by SCRINSHOT are on average 5%. This is  
260 likely an overestimate because Tamoxifen-induced recombination is rarely 100% efficient and  
261 because leaky RFP transcripts from the *Rosa* locus may escape nonsense-mediated RNA decay  
262 (NMD) (46). In conclusion, the analysis of the inducible knock-in reporter shows that the  
263 SCRINSHOT *RFP* signal highly correlates with RFP endogenous fluorescence intensity in *Sftpc-*  
264 *CreER<sup>pos</sup>* AT2 cells only. The low levels of false positive and false negative SCRINSHOT signals

265 for *RFP* and *Sftpc* argue for the efficiency of SCRINSHOT in the identification and quantification  
266 of gene expression in alveolar cell-types.

267

### 268 **Multiplex performance and gene expression quantification using SCRINSHOT**

269 To further explore the utility of SCRINSHOT in the spatial identification of cell types, we first tested  
270 if multiple rounds of hybridization and detection in lung tissue sections lead to loss of detection  
271 signal for the genes of interest, as seen in other transcriptomic approaches (5). We compared the  
272 detection signals of *Calca*, a known neuroendocrine gene marker during the first and the eighth  
273 cycles of hybridization and detection and found no significant loss of signal or decreased  
274 specificity (Supplementary Figure 4). In the same experiment, we also detected a pair of marker  
275 genes for airway secretory cells (*Scgb1a1* and *Cyp2f2*) and a pair of neuroendocrine cell markers  
276 (*Ascl1* and *Calca*) and mapped them relatively to each other in the bronchiolar epithelium (Figure  
277 6B). In total we analyzed 15 genes encoding soluble secreted proteins (*Scgb1a1*, *Napsa*, *Lgi3*,  
278 *Calca*, *Sftpc* and *Lyz2*), cell surface proteins and receptors (*Cd74*, *Cldn18*, *Fgfr2* and *Ager*), a  
279 metabolic enzyme *Cyp2f2*, and signaling proteins and transcription factors (*Axin2*, *Spry2*, and  
280 *Etv5*, *Ascl1*) (Figure 6A, B). We first focused on *Sftpc-CreER<sup>pos</sup>-Rosa-Ai14<sup>pos</sup>* AT2 cells and on  
281 the analysis of 11 selective AT2 markers covering a broad spectrum of expression levels (Figure  
282 6 A, C). To evaluate the utility of SCRINSHOT in complementing scRNA-Seq data with spatial  
283 information we compared the SCRINSHOT analysis with available scRNA-Seq data from 156  
284 AT2 cells (47). The mean values of SCRINSHOT dots in AT2 cells were proportional to the  
285 scRNA-Seq raw count values of AT2 cells. Spearman correlation analysis showed a strong  
286 correlation between the results of the two methodologies ( $\rho=0.9455$ ) for highly-, moderately- and  
287 lowly-expressed genes (Figure 6C). As expected, there was no correlation of the SCRINSHOT  
288 data from 5615 *Sftpc<sup>neg</sup>* alveolar cells when we compared them to the AT2 scRNA-Seq dataset  
289 ( $\rho=0.1636$ ). The proportional mean gene expression levels in SCRINSHOT and scRNA-Seq argue

290 that SCRINSHOT provides a suitable alternative for rapid, *in situ* evaluation of cell states detected  
291 by scRNA-Seq.

292

### 293 **Spatial mapping of tracheal cell heterogeneity using SCRINSHOT**

294 Recently, two studies addressed the heterogeneity of tracheal epithelium using sc-RNA Seq.  
295 These studies identified a new pulmonary cell type, which expresses *Cftr* and therefore  
296 considered to play a role in cystic fibrosis pathophysiology (48, 49). They also provided the  
297 detailed transcriptomic state of additional cell types, like basal, tuft and secretory cells, including  
298 club and two classes of goblet cells.

299 We tested the ability of SCRINSHOT to detect the above cell types and analyze tracheal epithelial  
300 cell heterogeneity with spatial, single-cell resolution. We used a panel of selective markers for  
301 club, goblet, basal, tuft and ionocytes, as identified in (48, 49). The 29 analyzed genes included  
302 (i) *Scgb1a1*, *Scgb3a1*, *Il13ra1*, *Reg3g*, *Lgr6* and *Bpifb1* as club-cell markers, (ii) *Foxq1*, *Gp2*,  
303 *Pax9*, *Spdef*, *Tff2*, *Lipf*, *Dcpp3* and *Dcpp1* as goblet-cell markers, (iii) *Trp5*, *Il25*, *Gng13*, *Six1*,  
304 *Alox5ap* and *Sox9* as tuft-cell markers, (iv) *Foxi1*, *Tfcp2l1*, *Cftr* and *Ascl3* as ionocyte markers,  
305 (v) *Ascl1* as a neuroendocrine cell marker (50) and (vi) *Krt5*, *Pdpn* and *Trp63* as basal cell  
306 markers. We also included *Muc5b* as a general secretory marker of the proximal airways (48, 49).  
307 For assignment of cell positions we utilized structural landmarks that separate the tracheal airway  
308 epithelium in three parts, the proximal, which extends until the end of the submucosal gland, the  
309 intermediate part, which spans eight cartilage rings deeper and the distal, which includes the  
310 remaining part of trachea epithelium, up to bronchial bifurcation (carina). We also assigned  
311 positions to proximal intra-lobar airway epithelial cells, which extend up to the L.L3 branching  
312 point (51) and to distal airway epithelial cells located at terminal bronchioles (Figure 7A).

313 For cell-type annotation, we initially applied the following threshold criteria for the selected marker  
314 genes. We considered club cells, only the *Scgb1a1<sup>pos</sup>* cells, which were negative for the  
315 neuroendocrine cell marker *Ascl1* and expressed up to one goblet, tuft, ionocyte and basal-cell  
316 markers. *Ascl1<sup>pos</sup>* cells were considered as neuroendocrine cells. Similarly, we annotated the  
317 analyzed cells as goblet, basal, tuft cells and ionocytes, if they were positive for at least two  
318 characteristic genes of the respective type and only expressed up to one marker of the others.  
319 The previously described similarities in gene expression between goblet and club cells in (48),  
320 prompted us to consider a cell as goblet if it was positive for at least two of the identified goblet  
321 cell markers, regardless of *Scgb1a1* expression. We sampled 1068 cells in submucosal glands  
322 and 216 proximal trachea airway epithelial cells. In the intermediate part of the tracheal tube, we  
323 quantified 953 cells and 1164 in the distal. In the intra-lobar airway epithelium, we analyzed 551  
324 cells in proximal and 484 in distal airways. SCRINSHOT detected all the previously described  
325 trachea cell-types. Club cells comprised 7% of total cells in proximal trachea and their proportion  
326 gradually increased to 77% towards the distal intra-lobar airways (Figure 7B). *Trp63<sup>pos</sup>*, *Krt5<sup>pos</sup>*  
327 and *Pdpr<sup>pos</sup>* basal cells were primarily detected in the intermediate part of the trachea (21% of  
328 the measured cells) and became reduced towards the intra-lobar airways (Figure 7 B, C, D). Tuft  
329 cells expressing *Trmp5*, *Gng13* and *Alox* were exclusively found in the tracheal epithelium (Figure  
330 7 B, C, E). Ionocytes present a rare cell-type (<1% of trachea epithelium) implicated in the  
331 pathogenesis of cystic fibrosis. We detected sparse ionocytes expressing *Cftr* along with the  
332 transcription factors *Tfp2l1*, *Ascl3* and *Foxi1* (48, 49) in the tracheal airway epithelium (Figure 7  
333 B, F) and even more rarely in the submucosal glands (Supplementary Figure 6). Their restricted  
334 positioning in the tracheal and submucosal gland epithelium highlights the importance of these  
335 lung regions in cystic fibrosis caused by *Cftr* mutations in experimental models and in patients  
336 (52, 53).

337 The majority of the *Ascl1*<sup>pos</sup> NE-cells were detected in the proximal-trachea, but as expected we  
338 also detected positive cells, scattered along the airways (Figure 7 B, C). Interestingly, 97% of the  
339 goblet cells were detected in the submucosal gland but not airway epithelium (Figure 7 B, F). In  
340 a hierarchical clustering of all annotated cells, the goblet cells were grouped together with the  
341 *Muc5b*<sup>pos</sup> cells into 2 clusters (Figure 7C). In agreement with the identification of 65 goblet cells  
342 in the sc-RNA Seq data of Montoro et al. (48), *Gp2* is detected in the majority of goblet cells. We  
343 also detected *Tff2*<sup>pos</sup> *Muc5b*<sup>pos</sup> cells corresponding the described *goblet-1* sub-cluster and cells  
344 corresponding to the *Dcpp3*<sup>pos</sup> *Lipf*<sup>pos</sup> *goblet-2* sub-cluster. Interestingly, SCRINSHOT revealed  
345 some additional spatial heterogeneity of *goblet-2* cells in the submucosal glands. We also noticed  
346 *Gp2*<sup>pos</sup> positive cells, expressing high levels of either *Dcpp3* or *Lipf* (Supplementary Figure 5 A)  
347 and second, a small subset of the *Dcpp3*<sup>pos</sup> cells also expressed *Dcpp1* (Supplementary Figure 5  
348 B, arrowhead) (48). The spatial analysis of epithelial cell types in the trachea and lung airways  
349 demonstrate the utility of SCRINSHOT in the localization of rare cell types in a complex tissue.

350

### 351 **Spatial mapping of airway and alveolar cells**

352 We used the expression values of 15 genes, in 14167 cells, to generated a spatial map of  
353 macrophages, AT1 and AT2 cells in the alveolar compartment and club and neuroendocrine cells  
354 in the airways (Supplementary Figure 7). We annotated an airway cell as secretory if it was  
355 *Scgb1a1*<sup>pos</sup> *Cyp2f2*<sup>pos</sup> *Ascl1*<sup>neg</sup> and neuroendocrine if it expressed *Ascl1*. In the alveolar  
356 compartment of the *Sftpc-CreER*<sup>pos</sup>-*Rosa-Ai14*<sup>pos</sup> lung, we annotated 1679 *Sftpc*<sup>pos</sup> cells as AT2.  
357 More than 99% of them also contained more than 3 dots of *Lyz2*, another AT2 marker (54), which  
358 is also expressed by lung inflammatory cell-types (36, 55). 91.8% of the AT2 cells were also  
359 scored positive for *Cd74*. This gene is significantly enriched in AT2 cells but it is also expressed  
360 in hematopoietic lineages (56). Additionally, SCRINSHOT analysis distinguished a group of 588  
361 *Lyz2*<sup>pos</sup> *Cd74*<sup>pos</sup> *Sftpc*<sup>neg</sup>, which are probably macrophages. We also detected 312 cells positive



362 only for *Lyz2* and 450 expressing only *Cd74*. This suggests that the combinatorial expression of  
363 3 genes defines four cell populations in the alveolar compartment, AT2 cells, *Lyz2*<sup>pos</sup> *Cd74*<sup>pos</sup>  
364 macrophages and single *Lyz2*<sup>pos</sup> or single *Cd74*<sup>pos</sup> immune cells. For identification of AT1  
365 epithelial cells, we used the expression of *Ager* (57). We scored 1129 alveolar *Ager*<sup>pos</sup> *Sftpc*<sup>neg</sup>  
366 *Scgb1a1*<sup>neg</sup> cells as AT1. This analysis argues that SCRINSHOT can readily distinguish known  
367 epithelial cell types in the lung airways and alveoli. Additional markers for other characterized cell-  
368 types, such as endothelial cells and fibroblasts, could be also included in future analyses to  
369 facilitate the creation of complete spatial maps of cells types in various organs and help to  
370 elucidate gene-expression and cell-type distribution patterns in healthy and diseased tissues.

371

## 372 **CONCLUSION**

373 SCRINSHOT simplifies multiplex, *in situ* detection of RNA in various tissues. The assay is  
374 optimized for high sensitivity and specificity. We present a robust analysis protocol with minimal  
375 requirements for extensive instrumentation or computational skills, which makes it user-friendly  
376 and accessible in many fields of biology. The protocol is suitable for validation of scRNA-seq  
377 results in small- or large-scale experiments or for the analysis of gene expression changes upon  
378 genetic or chemical manipulations. Importantly, SCRINSHOT is also a low-cost method compared  
379 to other *in situ* hybridization methods or antibody detection and the straight forward analysis  
380 protocol makes it suitable for routine laboratory use. Although SCRINSHOT multiplexity is  
381 reduced compared to “*in situ* sequencing” by ligation (24) or other barcode-based approaches (4,  
382 58), the number of detection fluorophores or hybridization detection cycles can be increased to  
383 detect 50 genes per slide. Manual cell segmentation is the most time-consuming part of the  
384 analysis and we believe that automatic segmentation will provide a future solution. At present, our  
385 attempts with open access programs like Ilastik (59) or Cell Profiler (60) only scored a 50%  
386 success rate in segmentation of lung sections presumably because of the elongated and



387 overlapping cell shapes and the large cavities of the lung alveolar compartment. Confocal  
388 microscopy and higher magnifications may improve resolution but cost will also increase. The  
389 SCRINSHOT analysis of the mouse submucosal gland, trachea and proximal-lung airway  
390 epithelium for 29 genes and distal-lung for the expression of 15 genes demonstrates the capacity  
391 of the method to detect not only low abundance mRNAs but also rare cell-types, like ionocytes,  
392 tuft and neuroendocrine cells, facilitating the generation of cellular maps from complex tissues.

393

## 394 **MATERIALS AND METHODS**

### 395 **Animals and Histology**

396 All experiments with *wild type* (C57Bl/6J) mice were approved by the Northern Stockholm Animal  
397 Ethics Committee (Ethical Permit numbers N254/2014, N91/2016 and N92/2016).

398 For transgenic mouse experiments, *Sftpc-CreER<sup>negative</sup>(42);Rosa26-Ai14<sup>positive</sup>(44)* and *Sftpc-*  
399 *CreER<sup>negative</sup>;Rosa26-Ai14<sup>positive</sup>* individuals were used according to German regulation for animal  
400 welfare at the Justus Liebig University of Giessen (Ethical Permit number GI 20/10, Nr. G  
401 21/2017). The recombination and *Sftpc<sup>pos</sup>* cell labelling of the *Sftpc-CreER<sup>pos</sup>;Rosa26-Ai14<sup>pos</sup>* lung  
402 was done by one subcutaneous injection of Taxamoxifen, on postnatal day 1 (P1) and the tissues  
403 were collected on P21. An *Sftpc-CreER<sup>neg</sup>;Rosa26-Ai14<sup>pos</sup>* littermate treated as above and used  
404 as negative control, in addition to a *wild type* P60 lung.

405 For lung tissue collection, the mice were anesthetized with a lethal dose of ketamine/xylazine.  
406 Lungs were perfused with ice cold PBS 1X pH7.4, through the heart right ventricle to remove red  
407 blood cells from the organ. A mixture (2:1 v/v) of (PFA 4% (Merck, 104005) in PBS 1X pH7.4):OCT  
408 (Leica Surgipath, FSC22) was injected into the lung, from the trachea using an insulin syringe  
409 with 20-24G plastic catheter B Braun 4251130-01), until the tip of the accessory lobe got inflated  
410 and the trachea was tied with surgical silk (Vömel, 14739). The lungs were removed and placed

411 in PFA 4% in PBS 1X pH7.4 for 4 hours for P21 lungs and 8 hours for adult, at 4°C in the dark,  
412 with gentle rotation or shaking. The other analyzed organs were simply placed in PFA 4% in PBS  
413 1X pH7.4 for 8 hours.

414 The tissues were transferred to a new tube with a mixture (2:1 v/v) of (30% sucrose in PBS 1X  
415 pH7.4):OCT at 4°C for 12-16 hours, with gentle rotation or shaking. Thereafter, tissues were  
416 embedded in OCT (Leica Surgipath, FSC22), using specific molds (Leica Surgipath, 3803025)  
417 and frozen in a slurry of isopentane and dry ice. Tissue-OCT blocks were kept at -80°C until  
418 sectioning. 10 µm thick sections were cut with a cryostat (Leica CM3050S) and placed on poly-  
419 lysine slides (Thermo, J2800AMNZ), kept at room temperature for 3 hours with silica gel (Merck,  
420 101969) and then stored at -80°C for further use.

421

## 422 **Embryonic human lungs**

423 Use of human fetal material from elective routine abortions was approved by the Swedish National  
424 Board of Health and Welfare and the analysis using this material were approved by the Swedish  
425 Ethical Review Authority (2018/769-31). After the clinical staff acquired informed written consent  
426 by the patient, the tissue retrieved was transferred to the research prenatal material lung sample  
427 was retrieved from a fetus at 8.5 w post-conception. The lung tissue was fixed for 8 hours at 4°C  
428 and processed as above.

429

## 430 **Probe Design**

431 A detailed description of the Padlock probe design is provided in the Additional File 1. Briefly, the  
432 PrimerQuest online tool (Integrated DNA Technologies: IDT) was used to select sequences of  
433 Taqman probes (40-45 nucleotides) for the targeted mRNA. These sequences were then  
434 interrogated against targeted-organism genome and transcriptome, with Blastn tool (NLM) to

435 guarantee their specificity. The Padlock Design Assistant.xlsm file was used to split the  
436 sequences in two and integrate them into the padlock backbone. Padlock probes were ordered  
437 from IDT as Ultramer DNA oligos and their sequences are provided in Additional File 2.

438 The 40-45 Taqman probe sequences were also used to prepare the fluorophore-labelled oligos.  
439 Using the IDT OligoAnalyzer tool the length of the sequences was adjusted to T<sub>m</sub> 56°C. To  
440 remove the fluorescent oligos after each detection cycle, we exchanged “T” nucleotides with “U”  
441 and treated with Uracil-DNA Glycosylase (Thermo, EN0362). Detection oligos were labelled at  
442 their 3'-end with fluorophores and manufactured by Eurofins Genomics. The sequences of  
443 fluorophore-labelled oligos are provided in Additional File 3.

444

#### 445 **Pretreatments of the slides**

446 Slides were transferred from -80°C to 45°C to reduce moisture. A post fixation step with 4% PFA  
447 in PBS 1x pH7.4 was done, followed by washes with PBS-Tween20 0.05%. Permeabilization of  
448 tissues was done with 0.1M HCl for 3 minutes, followed by two washes with PBS-Tween20 0.05%  
449 and dehydration with a series of ethanol. SecureSeal™ hybridization chambers (Grace Bio-Labs)  
450 were mounted on the slides and sections were preconditioned for 30 minutes at room temperature  
451 (R/T) with hybridization-reaction mixture of 1X Ampligase Buffer (Lucigen, A1905B), 0.05M KCl  
452 (Sigma-Aldrich, 60142), 20% deionized Formamide (Sigma-Aldrich, F9037), 0.2µg/ul BSA (New  
453 England Biolabs, B9000S), 1U/µl Ribolock (Thermo, EO0384) and 0.2µg/µl tRNA (Ambion,  
454 AM7119). To block unspecific binding of DNA we included 0.1µM Oligo-dT30 VN.

455

#### 456 **Padlock probe hybridization, ligation and RCA**

457 Hybridization of the Padlock probes was done in the above solution, omitting Oligo-dT30 VN and  
458 adding 0.05 µM of each Padlock probe. We used three padlock probes for every targeted RNA-

459 species. For the highly abundant *Scgb1a1* mRNA, we used 0.01  $\mu\text{M}$  of one padlock probe to  
460 minimize molecular and optical saturation. Hybridization included a denaturation step at 55°C for  
461 15 min and an annealing step at 45°C for 2 hours. Not hybridized padlock probes were removed  
462 by washes with 10% Formamide in 2X SSC (Sigma-Aldrich, S6639). To minimize the effect of  
463 the previously documented SplintR ligase nucleotide preferences (26, 33), padlock probe ligation  
464 was performed overnight O/N at 25°C using the SplintR ligase (NEB, M0375) at a final  
465 concentration of 0.5 Units/ $\mu\text{l}$ , T4 RNA ligase buffer (NEB, B0216) and 10 $\mu\text{M}$  ATP, according to  
466 manufacturer recommendations (see New England Biolabs webpage).

467 Rolling Cycle Amplification (RCA) was done O/N at 30°C using 0.5 Units/ $\mu\text{l}$   $\Phi$ 29 polymerase  
468 (Lucigen, 30221-2). The reaction mixture contained also 1X  $\Phi$ 29 buffer, 5% Glycerol, 0.25 mM  
469 dNTPs (Thermo, R0193), 0.2  $\mu\text{g}/\mu\text{l}$  BSA and 0.1  $\mu\text{M}$  RCA primers (RCA Primer1:  
470 TAAATAGACGCAGTCAGT\*A\*A and RCA Primer2: CGCAAGATATACG\*T\*C). The “\*” indicate  
471 Thiophosphate-modified bounds to inhibit the 3-5 exonuclease activity of  $\Phi$ 29 polymerase (23).  
472 A fixation step with 4% PFA for 15 minutes was done to ensure stabilization of the RCA-products  
473 on the tissue. Sections were thoroughly washed with PBS-Tween20 0.05% before next step.

474

#### 475 **Hybridization of detection-oligos**

476 The visualization of the RCA products was done with hybridization of the 3'-fluorophore labeled  
477 detection oligos. The reaction mixture contained 2X SSC, 20% deionized Formamide, 0.2  $\mu\text{g}/\mu\text{l}$   
478 BSA, 0.5 ng/ $\mu\text{l}$  DAPI (Biolegend, 422801), 0.4  $\mu\text{M}$  FITC-labeled and 0.2  $\mu\text{M}$  Cy3- and Cy5-labeled  
479 detection probes for 1 hour at R/T. Washes were performed with 10% Formamide in 2X SSC,  
480 followed by 6X SSC. Tissues sections were dehydrated with a series of ethanol, chambers were  
481 removed and the slides were covered with SlowFade™ Gold Antifade Mountant (Thermo,  
482 S36936) and a coverslip.

483 After image acquisition, the coverslips were removed by placing the slides in 70% ethanol in 45°C.  
484 Then, sections were dehydrated using a series of ethanol to mount the hybridization chambers.  
485 After tissue rehydration with PBS-Tween20 0.05%, the detection-oligos were digested with Uracil-  
486 DNA Glycosylase for 1hour at 37°C. The reaction mixture contained 1X UNG buffer, 0.2 µg/µl  
487 BSA and 0.02 Units/µl Uracil-DNA Glycosylase (Thermo, EN0362). Destabilized oligos were  
488 stripped off by thorough washes with 65% deionized Formamide at 30°C. Multiple rounds of  
489 hybridization and imaging, as described above, were performed until all genes were imaged.

490

#### 491 **Image acquisition**

492 Images were captured with a Zeiss Axio Observer Z.2 fluorescent microscope with a Colibri led  
493 light source, equipped with a Zeiss AxioCam 506 Mono digital camera and an automated stage,  
494 set to detect the same regions after every hybridization cycle.

495

#### 496 **Image analysis**

497 The nuclear staining was used to align the images of the same areas between the hybridizations  
498 and multi-channel \*.czi files, containing the images of all genes, were created using Zen2.5 (Carl  
499 Zeiss Microscopy GmbH). The images were analyzed as 16bit \*.tiff files, without compression or  
500 scaling. Images were tiled using a custom script in Matlab (The MathWorks, Inc.). Manual nuclear  
501 segmentation was done with Fiji ROI Manager (61). The nuclear ROIs were expanded for 2 µm  
502 with a custom Cell-Profiler script and considered as cells. The signal-dots were counted in these  
503 cell-ROIs using Cell-Profiler 3.15 (60), Fiji (62, 63) and R-RStudio (58, 64-67) custom scripts  
504 (<https://github.com/AlexSount/SCRINSHOT>).

505

#### 506 **Thresholding**

507 A cell-ROI size criterion was applied to remove the outliers with very small or big surface. In  
508 particular, only cells included between two standard deviations of the mean size of the analyzed  
509 cells were further processed. In SCRINSHOT we considered a cell-ROI positive for an analyzed  
510 gene, we used a threshold strategy. First, we determined the maximum numbers of signal-dots  
511 per cell-ROI for all analyzed genes. A cell-ROI was considered as positive, if it contained more  
512 than 10% of the maximum number of signal-dots for the specific gene. The higher threshold was  
513 set to 3, which was applied for highly abundant genes with maxima over 31 signal dots.

514

### 515 **Curation of the data**

516 In general, the 2  $\mu\text{m}$  nuclear expansion provides an underestimation of real signal dots and  
517 provides satisfactory results for airway cells (e.g. Figure 3A' merge-images with cell-ROI outlines)  
518 but the cellular segmentation of the alveolar region is more challenging mainly because of the  
519 irregular cell shapes and their overlap. This gave false positive cell-ROIs due to dots from adjacent  
520 true-positive cells being erroneously assigned to their neighbors. To reduce the noise, signal-dots  
521 of highly abundant RNA-species were used to visually inspect and remove the problematic cell-  
522 ROIs from further analysis.

523

### 524 **Clustering**

525 Annotated cells of submucosal gland, trachea and lung airway epithelium were clustered using  
526 hclust package in R (68).  $\text{Log}_2(\text{dots}/\text{cell} + 1)$  values were used to calculate Euclidean distances  
527 and clustering was done using ward.D2 method. Balloon plots were created by ggpubr package  
528 in R (69) and heatmaps with pheatmap package (70). Bootstrapping analysis was done by the  
529 clusterboot package (71). Clusters were considered as “stable” if bootstrap values were  $>0.5$ .

530

531 **Analysis of *Sftpc-CreER<sup>pos</sup>;Rosa26-Ai14<sup>pos</sup>* cells**

532 For the identification of the RFP<sup>pos</sup> alveolar cell-ROIs in the *Sftpc-CreER<sup>pos</sup>;Rosa26-Ai14<sup>pos</sup>* lung,  
533 all analyzed alveolar cells from the RFP<sup>neg</sup> *Sftpc-CreER<sup>neg</sup>;Rosa26-Ai14<sup>pos</sup>* lung were used to  
534 determine the maximum endogenous fluorescence (in Raw Integrated Density values) and set it  
535 as a threshold. The RFP<sup>pos</sup> and RFP<sup>neg</sup> cell-ROIs were curated and the *Sftpc* signal-dots were  
536 measured in them.

537 For the correlation of RFP endogenous fluorescence with SCRINSHOT *RFP* signal, the  
538 endogenous fluorescence (in Raw Integrated Density values) of all segmented cell-ROIs from the  
539 analyzed tissue sections was correlated with the detected RFP signal-dots in the same cell-ROIs,  
540 using simple linear regression analysis in Graphpad Prism with default settings.

541

542 **Comparison of SplintR and cDNA-based detection of RNA species**

543 To compare the performance of padlock-probe hybridization (i) directly on RNA (SCRINSHOT)  
544 and (ii) after cDNA synthesis, we used sequential 10µm-thick sections from adult mouse lungs,  
545 fixed for 8 hours (see above). cDNA-based approaches in earlier publications have only used  
546 fresh frozen tissues and pepsin or proteinase K tissue treatments to increase RNA accessibility  
547 (3, 24). The padlock probes were designed to recognize exactly the same sequence of the  
548 analyzed genes. For the highly (*Scgb1a1*, *Sftpc*) and intermediate (*Actb*) expressed genes, we  
549 used only one padlock probe and for *Pecam1*, three probes because of its lower expression  
550 levels.

551 For cDNA synthesis, the RNA species of the tissue sections were transformed to cDNA by reverse  
552 transcription (RT) using random decamers. The RNA strands were degraded with RNaseH to let  
553 padlock probes hybridize to the corresponding cDNA sequences. Padlock probe ligation was

554 done with Ampligase DNA ligase. All other steps were done according to the provided  
555 SCRINSHOT protocol.

556 For cDNA synthesis we used 20 U/ $\mu$ l of the SuperScript™ II Reverse Transcriptase (Thermo,  
557 18064014), 1X SuperScript™ II RT buffer (Thermo), 0.5 mM dNTPs (Thermo, R0193), 10mers-  
558 random primer (Thermo), 0.2  $\mu$ g/ $\mu$ l BSA (NEB, B9000S), and 1 U/ $\mu$ l RiboLock RNase Inhibitor  
559 (Thermo, EO0384), at 42°C, O/N. The slides were post-fixed with 4% (w/v) PFA in PBS 1X pH7.4,  
560 at RT for 30 min, following by 6 washes with PBS-Tween 0.05%.

561

### 562 **Evaluation of SCRINSHOT specificity using mutated padlock probes**

563 The experiment was done as described above, using 0.01  $\mu$ M of *Scgb1a1* padlock probes and  
564 0.05  $\mu$ M of the *Actb*. The “mismatch” probe had the same sequence as the normal *Scgb1a1*  
565 padlock probe with a C>G substitution at the 5'- ligation site and the “3'-scrambled” probe had the  
566 same 5'-arm but the 3'-arm was scrambled. *Actb* padlock probe was used as internal control to  
567 calculate the *Scgb1a1/Actb* ratios. The *Scgb1a1/Actb* ratios of cell-ROIs with zero *Actb* signal-  
568 dots were considered as zeros. The detection of all *Scgb1a1* RCA-products was done using a  
569 detection oligo, which recognizes the padlock-backbone of *Scgb1a1* but not of *Actb*. *Actb* RCA-  
570 product was detected by a detection oligo, which recognizes its gene-specific sequence  
571 (Additional File 3). The *Scgb1a1/Actb* fluorescence ratios were calculated using the Raw  
572 Integrated Densities of the two genes in each cell-ROI.

573

### 574 **Evaluation of SCRINSHOT specificity using an antisense competitor**

575 To compete the binding of *Scgb1a1* padlock probe on its target transcript, an antisense competitor  
576 (A), which recognizes the *Scgb1a1* mRNA between nucleotides 316-378 and masks the padlock  
577 probe hybridization site, was used in the same hybridization mixture with the *Scgb1a1* padlock



578 probe (P) at different ratios: (i) P:A=1:0, (ii) P:A=1:1, (iii) P:A=1:5, keeping the *Scgb1a1* padlock  
579 probe concentration to 0.05 $\mu$ M.

580

### 581 **Correlation with SCRINSHOT with published single cell RNA sequencing datasets**

582 The GSE118891 dataset was used to retrieve gene expression values (raw counts) of all AT2,  
583 according to the cell annotation of provided metadata file (47). The genes of interest were selected  
584 and their Mean values were calculated and  $\log_2(\text{dots}+1)$  transformed. Similarly, the SCRINSHOT  
585 signal-dots per cell-ROI were  $\log_2(\text{dots}+1)$  transformed. Pearson correlation analysis was done  
586 using GraphPad Prism.

587

### 588 **Statistical analysis**

589 All statistical analyses were done with Graphpad Prism, using nonparametric tests, since the  
590 SCRINSHOT data do not follow canonical distributions. Multiple comparisons were done using  
591 ANOVA Kruskal-Wallis multiple comparison test, without multiple comparison correction (“\*”:  $P \leq$   
592 0.05, “\*\*”:  $P \leq 0.01$ , “\*\*\*”:  $P \leq 0.001$ , “\*\*\*\*”:  $P \leq 0.0001$ ). For pairwise comparisons the statistical  
593 analysis was done using Mann-Whitney nonparametric t-test (“\*”:  $P \leq 0.05$ , “\*\*”:  $P \leq 0.01$ , “\*\*\*”:  $P$   
594  $\leq 0.001$ , “\*\*\*\*”:  $P \leq 0.0001$ ). Spearman correlation was used to examine the correlation between  
595 SCRINSHOT and scRNA-Seq data.

596

### 597 **Availability of data and materials**

598 The datasets and analysis files of the current study have been deposited at Zenodo repository  
599 (DOI: [10.5281/zenodo.3634561](https://doi.org/10.5281/zenodo.3634561)). All scripts are available at  
600 <https://github.com/AlexSount/SCRINSHOT>.

601

602 **Author contributions**

603 CS and AS conceived the idea and designed the experiments with help by MN and WS. ABF and  
604 AF provided mouse tissues and ES the human fetal material. AS and HPN performed all  
605 hybridizations. AS, AL and XQ wrote the analysis scripts. AS, AL and ABF analyzed the datasets.  
606 All authors helped interpreting results. CS, AS and HPN wrote the manuscript and AS the detailed  
607 protocol (Additional file 1) with input from all other authors. All authors read and approved the final  
608 manuscript. CS provided all funding support.

609

610 **Acknowledgments**

611 We would like to thank the Associate Professor Qi Dai for the thorough reading and suggestions  
612 of the detailed SCRINSHOT protocol (Additional File 1).

613

614 **Funding**

615 This study was supported by grants from the Swedish Research Council (Vetenskapsrådet, 2016-  
616 05059) and the Swedish Cancer Society (Cancerfonden, 160499) to CS.

617

618 **Competing interests**

619 MN and XQ hold shares in CARTANA AB, a company that commercializes *in situ* sequencing  
620 technology.

621

622

623 **Figure Legends**

624 **Figure 1.** Schematic representation of SCRINSHOT. The major steps of the assay are (A) All  
625 padlock-probe hybridization for all the targeted RNA-species followed by ligation and RCA-  
626 amplification. (B) RCA-products are detected sequentially reading three per cycle, with FITC-,  
627 Cy3- and Cy5- labelled detection-oligos, which recognize the gene-specific part of the padlock  
628 probes. (C) Images from all detection cycles are aligned using DAPI nuclear staining and  
629 segmented to create the cell-ROIs and signal-dots are counted and registered to the cell-ROIs.

630

631 **Figure 2.** SCRINSHOT specificity relies on stringent hybridization of padlock probes to their target  
632 RNAs. Images of SCRINSHOT signal, using normal *Scgb1a1* padlock probe (A), a *Scgb1a1*  
633 padlock probe with a point mutation at its ligation site (B), a *Scgb1a1* padlock probe with 3'-  
634 scrambled arm (C) and normal padlock probe but omitting SplintR ligase (D). *Actb* normal padlock  
635 probe was used in all conditions as internal control. DAPI: blue, *Scgb1a1*: gray, *Actb*: red. "n"  
636 indicates the number of airway cells in the corresponding images. (A'-D') Magnified areas of the  
637 indicated positions (square brackets) of images in the left. Pink outlines show the 2  $\mu$ m expanded  
638 airway nuclear ROIs, which are considered as cells. Scale-bar: 150  $\mu$ m. (E) Violin plot of the  
639 *Scgb1a1* and *Actb* signal-dots ratio in all airway cells. The ratio of cells with zero *Actb*-dots  
640 considered as zero. (F) Violin plot of the *Scgb1a1* and *Actb* fluorescence intensity ratio in all  
641 airway cells. SplintR<sup>pos</sup> n=473, mismatch n=574, 3'-scrambled n=507 and SplintR<sup>neg</sup> n=488.

642

643 **Figure 3.** Concentration-dependent SCRINSHOT detection efficiency. (A-C) Representative  
644 images of SCRINSHOT signals for *Scgb1a1* padlock probes in the absence or presence of an  
645 antisense competitor oligo targeting the binding site of *Scgb1a1* padlock probe. SCRINSHOT  
646 signal for *Scgb1a1* padlock probe in the absence of the antisense competitor oligo (A), when

647 mixed in equal concentration with the antisense competitor oligo (B) and when mixed with five  
648 times higher concentration of the antisense competitor oligo (C). (A'-C') Magnified areas of the  
649 indicated positions (square brackets) of images A-C. (D) Violin plot of the *Scgb1a1* and *Actb*  
650 signal-dots ratio in all airway cells of the three compared conditions. P: padlock probe, A:  
651 antisense competitor. Scale bars in (A-C) is 100  $\mu\text{m}$  and (A'-C') is 10 $\mu\text{m}$ . All analyses were done  
652 using raw images and the same thresholds. For visualization purposes, brightness and contrast  
653 of *Scgb1a1* were set independently in the compared conditions to show the existence of signal in  
654 the presence antisense competitor and avoid signal saturation in its absence.

655

656 **Figure 4.** Efficient detection of *Rosa-Ai14* mRNA upon *Sftpc-CreER* driven recombination, using  
657 SCRINSHOT. (A) Representative images of alveolar regions from P21 *Sftpc-CreER*<sup>pos</sup>;*Rosa-*  
658 *Ai14*<sup>pos</sup>, P21 *Sftpc-CreER*<sup>neg</sup>;*Rosa-Ai14*<sup>pos</sup> and P60 wild-type (*Sftpc-CreER*<sup>neg</sup>;*Rosa-Ai14*<sup>neg</sup>) lung  
659 sections. Asterisks indicate red blood cells with high auto-fluorescence, which give some false  
660 positive signals in wild-type lung, only. DAPI: blue, *RFP* mRNA detected with SCRINSHOT:  
661 magenta and endogenous fluorescence of RFP: green. Scale-bar: 10 $\mu\text{m}$ . (B) Regression  
662 analyses of RFP endogenous fluorescence (RAW integrated density) and *Ai14* SCRINSHOT  
663 dots, in the three analyzed lung sections, using Graphpad Prism. "n" indicates the number of total  
664 cells in the analyzed images, which used for the statistical analysis.

665

666 **Figure 5.** Correlation of *Sftpc* SCRINSHOT dots with RFP endogenous fluorescence and *RFP*  
667 mRNA signals. (A) Images of alveolar compartment from P21 *Sftpc-CreER*<sup>pos</sup>;*Rosa-Ai14*<sup>pos</sup>, P21  
668 *Sftpc-CreER*<sup>neg</sup>;*Rosa-Ai14*<sup>pos</sup> and P60 wild-type (*Sftpc-CreER*<sup>neg</sup>;*Rosa-Ai14*<sup>neg</sup>) lung sections,  
669 showing *Sftpc*<sup>pos</sup> (gray) AT2 cells in correlation to *Ai14* SCRINSHOT dots (detected *RFP* mRNA)  
670 (green) and RFP endogenous fluorescence (red). Scale-bar: 10  $\mu\text{m}$ . "n" designates the number  
671 of analyzed AT2 cells. (B) Violin plots of SCRINSHOT results for *RFP*, in addition to RFP

672 endogenous fluorescence (RAW integrated density) in AT2 cells of the analyzed lungs. (E) Bar  
673 plots of SCRINSHOT results for *Sftpc* in RFP<sup>pos</sup> and RFP<sup>neg</sup> alveolar cells, as indicated by  
674 endogenous fluorescence of *Sftpc-CreER<sup>neg</sup>;Rosa-Ai14<sup>pos</sup>* alveolar cells (threshold 2304340 units  
675 of raw integrated density), in addition to RFP in *Sftpc<sup>pos</sup>* and *Sftpc<sup>neg</sup>* AT2 cells. Threshold is set  
676 to 3 dots and shown with red dotted lines.

677

678 **Figure 6.** SCRINSHOT multiplexity and correlation with single-cell mRNA sequencing. (A)  
679 Representative image of an alveolar region (Alv), showing the SCRINSHOT signal-dots of 11 AT2  
680 selective genes. Merge image includes *Ager* (gray), *Sftpc* (green), *Cd74* (magenta) and DAPI  
681 (blue) for nuclear staining. The rest of the genes are indicated with italics and only single-channel  
682 images were used. (B) Image of an airway region (arw) with a neuroepithelial body (NEB),  
683 containing SCRINSHOT dots for the club-cell markers *Scgb1a1* (green) and *Cyp2f2* (yellow) and  
684 neuroendocrine (NE)-cell markers *Calca* (magenta) and *Ascl1* (gray). DAPI (blue) used for  
685 nuclear staining. (C) Correlation plot of the indicated genes, between the log<sub>2</sub>(raw counts+1)  
686 values of 156 AT2 cells from Liu et al., 2019 and SCRINSHOT signal dots of 1679 AT2 cells.  
687 Scale bar: 10µm.

688

689 **Figure 7.** Spatial mapping of tracheal cell types with SCRINSHOT. (A) Overview of analyzed  
690 trachea and lung tissue sections using nuclear staining. Analyzed areas are indicated by brackets,  
691 corresponding to proximal trachea, submucosal glands (GS), intermediate and distal trachea,  
692 followed by proximal and distal lung airways. Trachea image includes also thyroid glands. Scale  
693 bar: 500µm. (B) Balloon plot of the annotated cell-types at the analyzed positions. The balloon  
694 size indicates the percentage of the cell-type at the indicated position relatively to the total number  
695 of cells of the cell-type. The balloon intensity corresponds to the percentage of the specified cell-  
696 type, relative of the total number of cells at the indicated position. (C) Hierarchical clustering of

697 the annotated cells. Heatmap shows the  $\log_2(\text{dots/cell} + 1)$  gene values in the analyzed cells. (D)  
698 Characteristic example of basal cells in tracheal epithelium. *Trp63* (green), *Ktr5* (red), *Pdpr* (gray)  
699 and DAPI (blue). Scale bar: 10 $\mu\text{m}$ . (E) Detection of a tuft cell in tracheal epithelium. *Sox9* (green),  
700 *Gng13* (red), *Alox5ap* (gray), *Trpm5* (yellow), *Six1* (magenta) and DAPI (blue). Scale bar: 10 $\mu\text{m}$ .  
701 (F) An ionocyte in trachea airway epithelium, detected with *Tfcp2l1* (green), *Foxi1* (red), *Cftr*  
702 (gray), *Ascl3* (yellow) and Dapi (blue). Scale bar: 10 $\mu\text{m}$ .

703

704 **Supplementary Figure 1.** Comparison of SplintR-based (SCRINSHOT) and the cDNA-based *in*  
705 *situ* hybridization assays for high, intermediate and low abundant genes in sequential PFA fixed  
706 lung sections. (A) Images of SplintR-based (SCRINSHOT) and cDNA-based *in situ* hybridization  
707 assays, in sequential lung sections. DAPI: blue, *Scgb1a1*: green, *Sftpc*: gray, *Actb*: red and  
708 *Pecam1*: cyan. Pink outlines show the 2  $\mu\text{m}$  expanded airway nuclear ROIs, which are considered  
709 as cells. The square brackets indicate the magnified areas on the right. The “n” correspond to the  
710 number of counted cells in large images. Scale bar: 100 $\mu\text{m}$ . (B) Bar-plots of the analyzed gene  
711 signals, in the indicated tissue compartments, for SCRINSHOT and cDNA-based approaches.  
712 The differences between the two conditions are significant ( $P < 0.0001$ ) for all analyzed genes.  
713 (C) Histograms of the analyzed genes. The Y-axes indicate the percentage of the cell-ROIs and  
714 the X-axes, the binned signal dots in each cell. In SplintR-condition, 350 cells localized in airways  
715 (arw) and 1624 in alveolar (alv) compartment. In cDNA-condition, there are 295 airway and 1706  
716 alveolar cells. Analysis was done using raw images, with the same acquisition conditions and  
717 thresholds. Only for visualization purposes, signal intensity of *Scgb1a1* and *Sftpc* in cDNA-  
718 condition was set 5-times higher than SplintR.

719

720 **Supplementary Figure 2.** SCRINSHOT application on mouse kidney and heart. (A) Application  
721 of SCRINSHOT in adult mouse kidney sections shows signal for *Actb* (gray), *Napsa* (magenta)

722 and *Lyz2* (cyan) but not *Scgb1a1* (green) and *Sftpc* (red). (B) Representative image from an adult  
723 mouse heart section, containing a vessel (v). *Pecam1* (magenta) is detected at the vessel walls,  
724 *Actb* (gray) is uniformly expressed and *Lyz2* (cyan) labels a few cells (presumably macrophages)  
725 but not *Scgb1a1* (green) and *Sftpc* (red) are not detected. DAPI: blue, scale bar: 50µm.

726

727 **Supplementary Figure 3.** SCRINSHOT application on fetal human lung. On the left, overview of  
728 a w8.5 whole left lung tissue section, showing SCRINSHOT signal for SOX2 (green), SOX9 (red)  
729 and *ASCL1* (gray). The square brackets correspond to the images on the right. DAPI (blue) was  
730 used as nuclear staining. Scale bar: 500µm. (A) Representative image of proximal epithelium,  
731 which is highly positive of SOX2 and *ASCL1* but not SOX9. (B) Representative image of highly  
732 SOX9 positive distal epithelium.

733

734 **Supplementary Figure 4.** Comparison of detected *Calca* RCA-products in first and eighth  
735 hybridizations. (A, B) Images on the left show the *Ascl1*<sup>pos</sup> (gray) neuroendocrine cells of an airway  
736 neuroepithelial body, in relation to *Scgb1a1*<sup>pos</sup> (red) club cells. DAPI: blue, scale bar: 10µm. (C)  
737 Note that neuroepithelial bodies are tightly packed cellular structures, as indicated by DAPI  
738 nuclear staining. The images on the right show the *Calca* RCA-products, detected in the first (D)  
739 and the eighth (E) detection cycles. (D'-F') Magnified areas of the indicated positions (brackets)  
740 of images D-F, respectively. (F) Overlay of *Calca* identified signal-dots in first (cyan) and eighth  
741 (yellow) detection cycles, using the same threshold in CellProfiler.

742

743 **Supplementary Figure 5.** SCRINSHOT mapping of submucosal glands reveals spatial  
744 heterogeneity in goblet cell population. Overview of the analyzed submucosal gland for the  
745 expression of 6 goblet cell markers shows their expression in submucosal gland but not airway

746 epithelium. *Muc5b* is detected along the airway epithelium of the proximal trachea, indicating that  
747 it is a general proximal epithelial cell marker. *Tff2*: green, *Muc5b*: red, *Gp2*: gray, *Dcpp3*: cyan,  
748 *Dcpp1*: magenta, *Lipf*: yellow, DAPI: blue and cell-ROIs: pink. Scale bar: 500 $\mu$ m. (A) Insert  
749 showing the previously described *Muc5b*<sup>pos</sup> *Tff2*<sup>pos</sup> goblet subtype (arrow) and the *Lipf*<sup>pos</sup> *Dcpp3*<sup>pos</sup>  
750 (asterisk). *Lipf*<sup>pos</sup> (hash) and *Dcpp3*<sup>pos</sup> (arrowhead) are detected in the same region, being positive  
751 for the general goblet cell marker *Gp2*. (B) Insert showing regionally restricted expression of  
752 *Dcpp1* in a subset of *Dcpp3*<sup>pos</sup> cells. Insert scale bar: 10 $\mu$ m.

753

754 **Supplementary Figure 6.** Ionocyte in the submucosal gland. (Top) overview of the analyzed  
755 submucosal gland, showing SCRINSHOT signal for ionocyte markers, *Tfcp2l1* (green), *Cftr*  
756 (gray), *Foxi1* (red), *Ascl3* (yellow) and DAPI (blue). Scale bar: 500 $\mu$ m. (Bottom) Magnified area of  
757 the indicated square in overview image, showing a detected ionocyte in submucosal gland. Scale  
758 bar: 10 $\mu$ m.

759

760 **Supplementary Figure 7.** SCRINSHOT generates cell-type digital annotation maps of large  
761 tissue areas. (i) Overview image of SCRINSHOT fluorescence signal-dots for *Scgb1a1* (green),  
762 *Sftpc* (magenta) and *Ascl1* (gray) of a large area from P21 *Sftpc-CreER*<sup>pos</sup>;*Rosa-Ai14*<sup>pos</sup> lung  
763 section, after Tamoxifen induction on P1 (RFP was not shown at that image). The image contains  
764 14167 manual segmented nuclei, which were expanded for 2  $\mu$ m and considered as cells. (ii)  
765 Spatial map of annotated cell types according to the indicated criteria. (A) Same airway area as  
766 in Figure 6B, showing club (*Scgb1a1*: green and *Cyp2f2*: yellow) and NE-cell (*Calca*: magenta  
767 and *Ascl1*: gray) markers, in an airway position with a neuro-epithelial body (NEB). (A') Cell-type  
768 digital annotation of the area corresponding to "A". The "\*" indicate *Ascl1*<sup>pos</sup> *Calca*<sup>neg</sup> cells Club  
769 cells: green and NE-cells: red. (B) Same alveolar area as in Figure 6A showing *Ager*<sup>pos</sup> (gray)  
770 *Sftpc*<sup>neg</sup> (green) *Cd74*<sup>neg</sup> (magenta) AT1 cells (arrow), *Ager*<sup>low</sup> *Sftpc*<sup>pos</sup> *Cd74*<sup>low</sup> AT2 cells (asterisks)



771 and *Ager<sup>neg</sup> Sftpc<sup>neg</sup> Lyz2<sup>pos</sup> Cd74<sup>high</sup>* macrophages (mΦ, arrowhead). (B') Cell-type digital  
772 annotation of the area corresponding to "B". AT1 cells: gray, AT2 cells: magenta and  
773 macrophages: white. All not annotated cells are depicted with blue. Scale bar: 200μm.

774

775

776

777

778

779

780

781

782

783

784

785

786

787

788

789

790

791

792 **Literature**

- 793 1. Ziegenhain C, Vieth B, Parekh S, Reinius B, Guillaumet-Adkins A, Smets M, et al.  
794 Comparative Analysis of Single-Cell RNA Sequencing Methods. *Mol Cell*. 2017;65(4):631-43 e4.
- 795 2. Strell C, Hilscher MM, Laxman N, Svedlund J, Wu C, Yokota C, et al. Placing RNA in  
796 context and space - methods for spatially resolved transcriptomics. *FEBS J*. 2019;286(8):1468-  
797 81.
- 798 3. Ke R, Mignardi M, Pacureanu A, Svedlund J, Botling J, Wahlby C, et al. In situ sequencing  
799 for RNA analysis in preserved tissue and cells. *Nat Methods*. 2013;10(9):857-60.
- 800 4. Chen KH, Boettiger AN, Moffitt JR, Wang S, Zhuang X. RNA imaging. Spatially resolved,  
801 highly multiplexed RNA profiling in single cells. *Science*. 2015;348(6233):aaa6090.
- 802 5. Codeluppi S, Borm LE, Zeisel A, La Manno G, van Lunteren JA, Svensson CI, et al. Spatial  
803 organization of the somatosensory cortex revealed by osmFISH. *Nat Methods*. 2018;15(11):932-  
804 5.
- 805 6. Stahl PL, Salmen F, Vickovic S, Lundmark A, Navarro JF, Magnusson J, et al.  
806 Visualization and analysis of gene expression in tissue sections by spatial transcriptomics.  
807 *Science*. 2016;353(6294):78-82.
- 808 7. Rodriques SG, Stickels RR, Goeva A, Martin CA, Murray E, Vanderburg CR, et al. Slide-  
809 seq: A scalable technology for measuring genome-wide expression at high spatial resolution.  
810 *Science*. 2019;363(6434):1463-7.
- 811 8. Gall JG, Pardue ML. Formation and detection of RNA-DNA hybrid molecules in cytological  
812 preparations. *Proc Natl Acad Sci U S A*. 1969;63(2):378-83.
- 813 9. Femino AM, Fay FS, Fogarty K, Singer RH. Visualization of single RNA transcripts in situ.  
814 *Science*. 1998;280(5363):585-90.

- 815 10. Raj A, van den Bogaard P, Rifkin SA, van Oudenaarden A, Tyagi S. Imaging individual  
816 mRNA molecules using multiple singly labeled probes. *Nat Methods*. 2008;5(10):877-9.
- 817 11. Strell C, Hilscher MM, Laxman N, Svedlund J, Wu C, Yokota C, et al. Placing RNA in  
818 context and space – methods for spatially resolved transcriptomics. 2019;286(8):1468-81.
- 819 12. Nagendran M, Riordan DP, Harbury PB, Desai TJJE. Automated cell-type classification in  
820 intact tissues by single-cell molecular profiling. 2018;7:e30510.
- 821 13. Ramachandran Iyer EP, Punthambaker S, Liu S, Jindal K, Farrell M, Murn J, et al.  
822 Barcoded oligonucleotides ligated on RNA amplified for multiplex and parallel in-situ analyses.  
823 2018:281121.
- 824 14. Eng CL, Lawson M, Zhu Q, Dries R, Koulena N, Takei Y, et al. Transcriptome-scale super-  
825 resolved imaging in tissues by RNA seqFISH. *Nature*. 2019;568(7751):235-9.
- 826 15. Lubeck E, Coskun AF, Zhiyentayev T, Ahmad M, Cai L. Single-cell in situ RNA profiling  
827 by sequential hybridization. *Nat Methods*. 2014;11(4):360-1.
- 828 16. Shah S, Lubeck E, Schwarzkopf M, He TF, Greenbaum A, Sohn CH, et al. Single-molecule  
829 RNA detection at depth by hybridization chain reaction and tissue hydrogel embedding and  
830 clearing. *Development*. 2016;143(15):2862-7.
- 831 17. Wang F, Flanagan J, Su N, Wang L-C, Bui S, Nielson A, et al. RNAscope: A Novel *in*  
832 *Situ* RNA Analysis Platform for Formalin-Fixed, Paraffin-Embedded Tissues. *The Journal*  
833 *of Molecular Diagnostics*. 2012;14(1):22-9.
- 834 18. Choi HMT, Calvert CR, Husain N, Huss D, Barsi JC, Deverman BE, et al. Mapping a  
835 multiplexed zoo of mRNA expression. 2016;143(19):3632-7.

- 836 19. Shah S, Lubeck E, Schwarzkopf M, He T-F, Greenbaum A, Sohn CH, et al. Single-  
837 molecule RNA detection at depth by hybridization chain reaction and tissue hydrogel embedding  
838 and clearing. 2016;143(15):2862-7.
- 839 20. Marras SAE, Bushkin Y, Tyagi S. High-fidelity amplified FISH for the detection and allelic  
840 discrimination of single mRNA molecules. Proc Natl Acad Sci U S A. 2019;116(28):13921-6.
- 841 21. Larsson C, Grundberg I, Soderberg O, Nilsson M. In situ detection and genotyping of  
842 individual mRNA molecules. Nat Methods. 2010;7(5):395-7.
- 843 22. Lizardi PM, Huang X, Zhu Z, Bray-Ward P, Thomas DC, Ward DC. Mutation detection and  
844 single-molecule counting using isothermal rolling-circle amplification. Nat Genet. 1998;19(3):225-  
845 32.
- 846 23. Dean FB, Nelson JR, Giesler TL, Lasken RS. Rapid amplification of plasmid and phage  
847 DNA using Phi 29 DNA polymerase and multiply-primed rolling circle amplification. Genome Res.  
848 2001;11(6):1095-9.
- 849 24. Svedlund J, Strell C, Qian X, Zilkens KJC, Tobin NP, Bergh J, et al. Generation of in situ  
850 sequencing based OncoMaps to spatially resolve gene expression profiles of diagnostic and  
851 prognostic markers in breast cancer. EBioMedicine. 2019.
- 852 25. Wang X, Allen WE, Wright MA, Sylwestrak EL, Samusik N, Vesuna S, et al. Three-  
853 dimensional intact-tissue sequencing of single-cell transcriptional states. Science.  
854 2018;361(6400).
- 855 26. Iyer EPR, Punthambaker S, Liu S, Jindal K, Farrell M, Murn J, et al. Barcoded  
856 oligonucleotides ligated on RNA amplified for multiplex and parallel in-situ analyses. bioRxiv.  
857 2018:281121.

- 858 27. Rouhanifard SH, Mellis IA, Dunagin M, Bayatpour S, Jiang CL, Dardani I, et al. ClampFISH  
859 detects individual nucleic acid molecules using click chemistry-based amplification. *Nat*  
860 *Biotechnol.* 2018.
- 861 28. Nagendran M, Riordan DP, Harbury PB, Desai TJ. Automated cell-type classification in  
862 intact tissues by single-cell molecular profiling. *Elife.* 2018;7.
- 863 29. Ho CK, Van Etten JL, Shuman S. Characterization of an ATP-dependent DNA ligase  
864 encoded by *Chlorella* virus PBCV-1. *J Virol.* 1997;71(3):1931-7.
- 865 30. Jiang M, Liu L, Hong C, Chen D, Yao X, Chen X, et al. Single molecule chromogenic in  
866 situ hybridization assay for RNA visualization in fixed cells and tissues. *RNA.* 2019;25(8):1038-  
867 46.
- 868 31. Takahashi H, Ohkawachi M, Horio K, Kobori T, Aki T, Matsumura Y, et al. RNase H-  
869 assisted RNA-primed rolling circle amplification for targeted RNA sequence detection. *Sci Rep.*  
870 2018;8(1):7770.
- 871 32. Schneider N, Meier M. Efficient in situ detection of mRNAs using the *Chlorella* virus DNA  
872 ligase for padlock probe ligation. *RNA.* 2017;23(2):250-6.
- 873 33. Krzywkowski T, Nilsson M. Fidelity of RNA templated end-joining by *chlorella* virus DNA  
874 ligase and a novel iLock assay with improved direct RNA detection accuracy. *Nucleic Acids Res.*  
875 2017;45(18):e161.
- 876 34. Shah S, Lubeck E, Zhou W, Cai L. In Situ Transcription Profiling of Single Cells Reveals  
877 Spatial Organization of Cells in the Mouse Hippocampus. *Neuron.* 2016;92(2):342-57.
- 878 35. Ho CK, Van Etten JL, Shuman S. Characterization of an ATP-dependent DNA ligase  
879 encoded by *Chlorella* virus PBCV-1. 1997;71(3):1931-7.

- 880 36. Abram CL, Roberge GL, Hu Y, Lowell CA. Comparative analysis of the efficiency and  
881 specificity of myeloid-Cre deleting strains using ROSA-EYFP reporter mice. *J Immunol Methods*.  
882 2014;408:89-100.
- 883 37. Stadtfeld M, Ye M, Graf T. Identification of interventricular septum precursor cells in the  
884 mouse embryo. *Dev Biol*. 2007;302(1):195-207.
- 885 38. Munro DAD, Hughes J. The Origins and Functions of Tissue-Resident Macrophages in  
886 Kidney Development. *Front Physiol*. 2017;8:837.
- 887 39. Mori K, Shimizu H, Konno A, Iwanaga T. Immunohistochemical localization of napsin and  
888 its potential role in protein catabolism in renal proximal tubules. *Arch Histol Cytol*. 2002;65(4):359-  
889 68.
- 890 40. Danopoulos S, Alonso I, Thornton ME, Grubbs BH, Bellusci S, Warburton D, et al. Human  
891 lung branching morphogenesis is orchestrated by the spatiotemporal distribution of ACTA2,  
892 SOX2, and SOX9. *Am J Physiol Lung Cell Mol Physiol*. 2018;314(1):L144-L9.
- 893 41. Nikolic MZ, Caritg O, Jeng Q, Johnson JA, Sun D, Howell KJ, et al. Human embryonic  
894 lung epithelial tips are multipotent progenitors that can be expanded in vitro as long-term self-  
895 renewing organoids. *Elife*. 2017;6.
- 896 42. Chapman HA, Li X, Alexander JP, Brumwell A, Lorzio W, Tan K, et al. Integrin  
897 alpha6beta4 identifies an adult distal lung epithelial population with regenerative potential in mice.  
898 *J Clin Invest*. 2011;121(7):2855-62.
- 899 43. Lakso M, Sauer B, Mosinger B, Jr., Lee EJ, Manning RW, Yu SH, et al. Targeted oncogene  
900 activation by site-specific recombination in transgenic mice. *Proc Natl Acad Sci U S A*.  
901 1992;89(14):6232-6.

- 902 44. Madisen L, Zwingman TA, Sunkin SM, Oh SW, Zariwala HA, Gu H, et al. A robust and  
903 high-throughput Cre reporting and characterization system for the whole mouse brain. *Nat*  
904 *Neurosci.* 2010;13(1):133-40.
- 905 45. Hogan BL, Barkauskas CE, Chapman HA, Epstein JA, Jain R, Hsia CC, et al. Repair and  
906 regeneration of the respiratory system: complexity, plasticity, and mechanisms of lung stem cell  
907 function. *Cell Stem Cell.* 2014;15(2):123-38.
- 908 46. Hug N, Longman D, Caceres JF. Mechanism and regulation of the nonsense-mediated  
909 decay pathway. *Nucleic Acids Res.* 2016;44(4):1483-95.
- 910 47. Liu Q, Liu K, Cui G, Huang X, Yao S, Guo W, et al. Lung regeneration by multipotent stem  
911 cells residing at the bronchioalveolar-duct junction. *Nat Genet.* 2019;51(4):728-38.
- 912 48. Montoro DT, Haber AL, Biton M, Vinarsky V, Lin B, Birket SE, et al. A revised airway  
913 epithelial hierarchy includes CFTR-expressing ionocytes. *Nature.* 2018;560(7718):319-24.
- 914 49. Plasschaert LW, Zilionis R, Choo-Wing R, Savova V, Knehr J, Roma G, et al. A single-cell  
915 atlas of the airway epithelium reveals the CFTR-rich pulmonary ionocyte. *Nature.*  
916 2018;560(7718):377-81.
- 917 50. McGovern S, Pan J, Oliver G, Cutz E, Yeger H. The role of hypoxia and neurogenic genes  
918 (Mash-1 and Prox-1) in the developmental programming and maturation of pulmonary  
919 neuroendocrine cells in fetal mouse lung. *Lab Invest.* 2010;90(2):180-95.
- 920 51. Metzger RJ, Klein OD, Martin GR, Krasnow MA. The branching programme of mouse lung  
921 development. *Nature.* 2008;453(7196):745-50.
- 922 52. Birket SE, Davis JM, Fernandez CM, Tuggle KL, Oden AM, Chu KK, et al. Development  
923 of an airway mucus defect in the cystic fibrosis rat. *JCI Insight.* 2018;3(1).

- 924 53. Inglis SK, Wilson SM. Cystic fibrosis and airway submucosal glands. *Pediatr Pulmonol.*  
925 2005;40(4):279-84.
- 926 54. Nabhan AN, Brownfield DG, Harbury PB, Krasnow MA, Desai TJ. Single-cell Wnt signaling  
927 niches maintain stemness of alveolar type 2 cells. *Science.* 2018;359(6380):1118-23.
- 928 55. McCubbrey AL, Allison KC, Lee-Sherick AB, Jakubzick CV, Janssen WJ. Promoter  
929 Specificity and Efficacy in Conditional and Inducible Transgenic Targeting of Lung Macrophages.  
930 *Front Immunol.* 2017;8:1618.
- 931 56. Lee JH, Kim J, Gludish D, Roach RR, Saunders AH, Barrios J, et al. Surfactant protein-C  
932 chromatin-bound green fluorescence protein reporter mice reveal heterogeneity of surfactant  
933 protein C-expressing lung cells. *Am J Respir Cell Mol Biol.* 2013;48(3):288-98.
- 934 57. Chung MI, Hogan BLM. Ager-CreER(T2): A New Genetic Tool for Studying Lung Alveolar  
935 Development, Homeostasis, and Repair. *Am J Respir Cell Mol Biol.* 2018;59(6):706-12.
- 936 58. Wickham H. *Ggplot2 : elegant graphics for data analysis.* New York: Springer; 2009. viii,  
937 212 p. p.
- 938 59. Berg S, Kutra D, Kroeger T, Straehle CN, Kausler BX, Haubold C, et al. *ilastik: interactive*  
939 *machine learning for (bio)image analysis.* *Nat Methods.* 2019.
- 940 60. McQuin C, Goodman A, Chernyshev V, Kametsky L, Cimini BA, Karhohs KW, et al.  
941 *CellProfiler 3.0: Next-generation image processing for biology.* *PLoS Biol.* 2018;16(7):e2005970.
- 942 61. Schindelin J, Arganda-Carreras I, Frise E, Kaynig V, Longair M, Pietzsch T, et al. Fiji: an  
943 open-source platform for biological-image analysis. *Nat Methods.* 2012;9(7):676-82.
- 944 62. Preibisch S, Saalfeld S, Tomancak P. Globally optimal stitching of tiled 3D microscopic  
945 image acquisitions. *Bioinformatics.* 2009;25(11):1463-5.



- 946 63. Schneider CA, Rasband WS, Eliceiri KW. NIH Image to ImageJ: 25 years of image  
947 analysis. *Nat Methods*. 2012;9(7):671-5.
- 948 64. Team RC. R: A language and environment for statistical computing. 2013.
- 949 65. Allaire J. RStudio: integrated development environment for R. Boston, MA. 2012;770.
- 950 66. Wickham H, Wickham MH. Package 'plyr'. Obtenido de [https://cran](https://cran.rproject.org/web/packages/dplyr/dplyr.pdf)  
951 [rproject](https://cran.rproject.org/web/packages/dplyr/dplyr.pdf)  
org/web/packages/dplyr/dplyr pdf. 2016.
- 952 67. Peterson M, Malloy J, Buonaccorsi V, Marden J. Teaching RNAseq at undergraduate  
953 institutions: a tutorial and R package from the Genome Consortium for Active Teaching.  
954 CourseSource doi: [https://doi](https://doi.org/1024918/cs) org/1024918/cs. 2015.
- 955 68. Mullner D. fastcluster: Fast Hierarchical, Agglomerative Clustering Routines for R and  
956 Python. *J Stat Softw*. 2013;53(9):1-18.
- 957 69. Kassambara A. ggpubr: "ggplot2" based publication ready plots. R package version 01.  
958 2017;6.
- 959 70. Kolde R. Pheatmap: pretty heatmaps. 2015. R package version. 2017;1(10).
- 960 71. Hennig C. fpc: Flexible procedures for clustering. R package version 2.1-5. 2013.
- 961

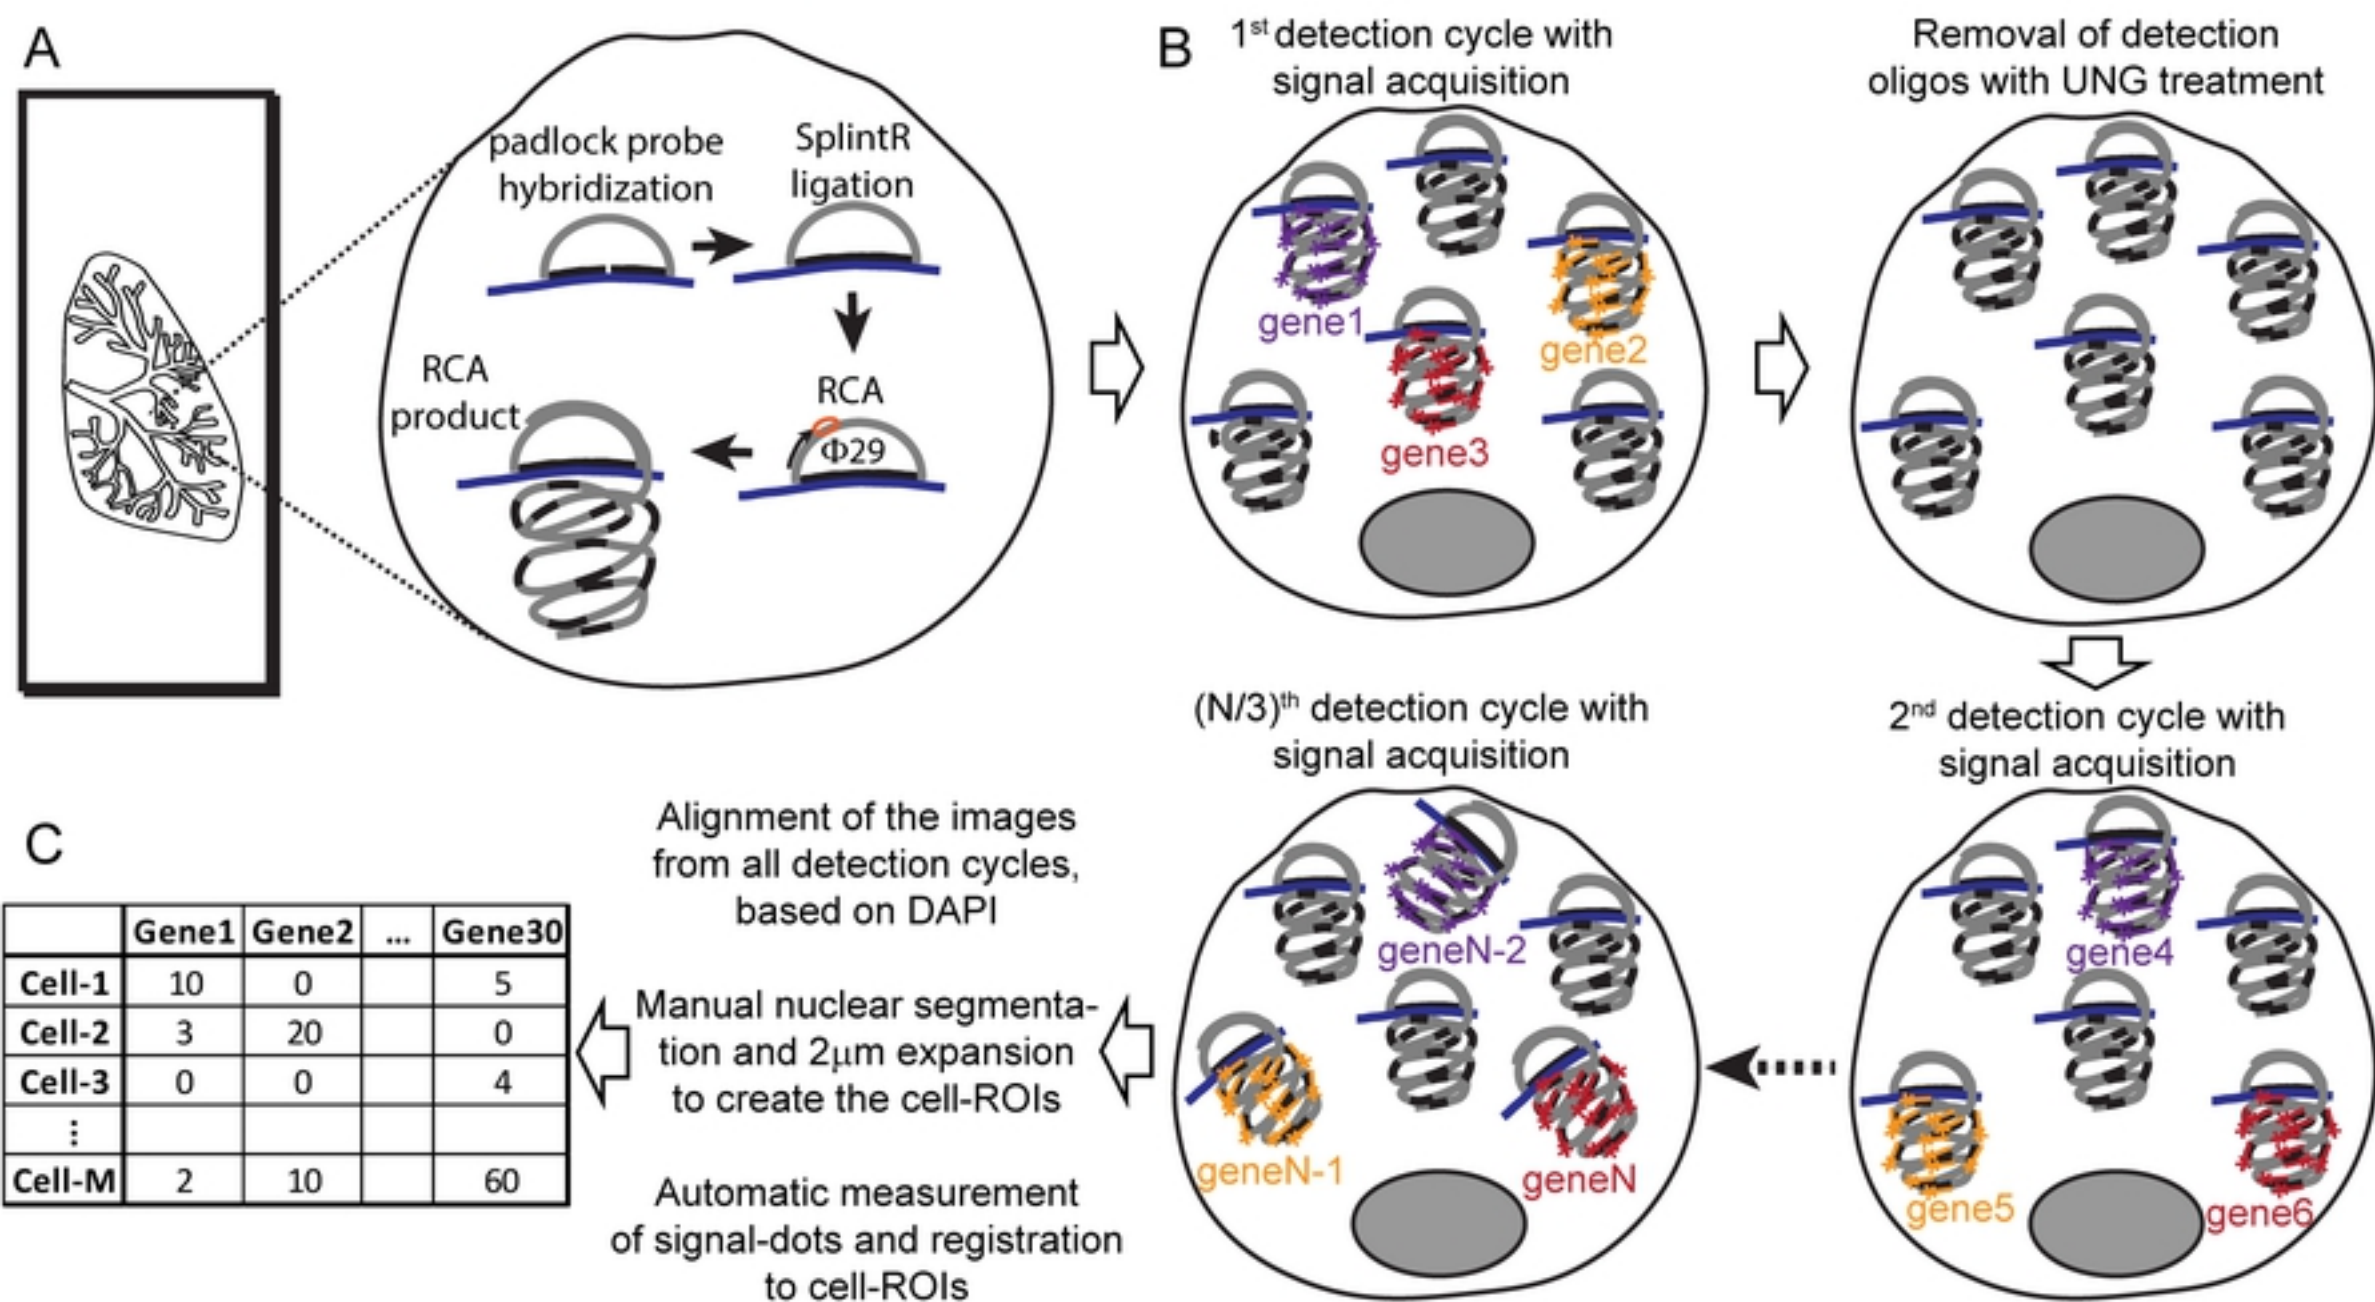

Figure\_1



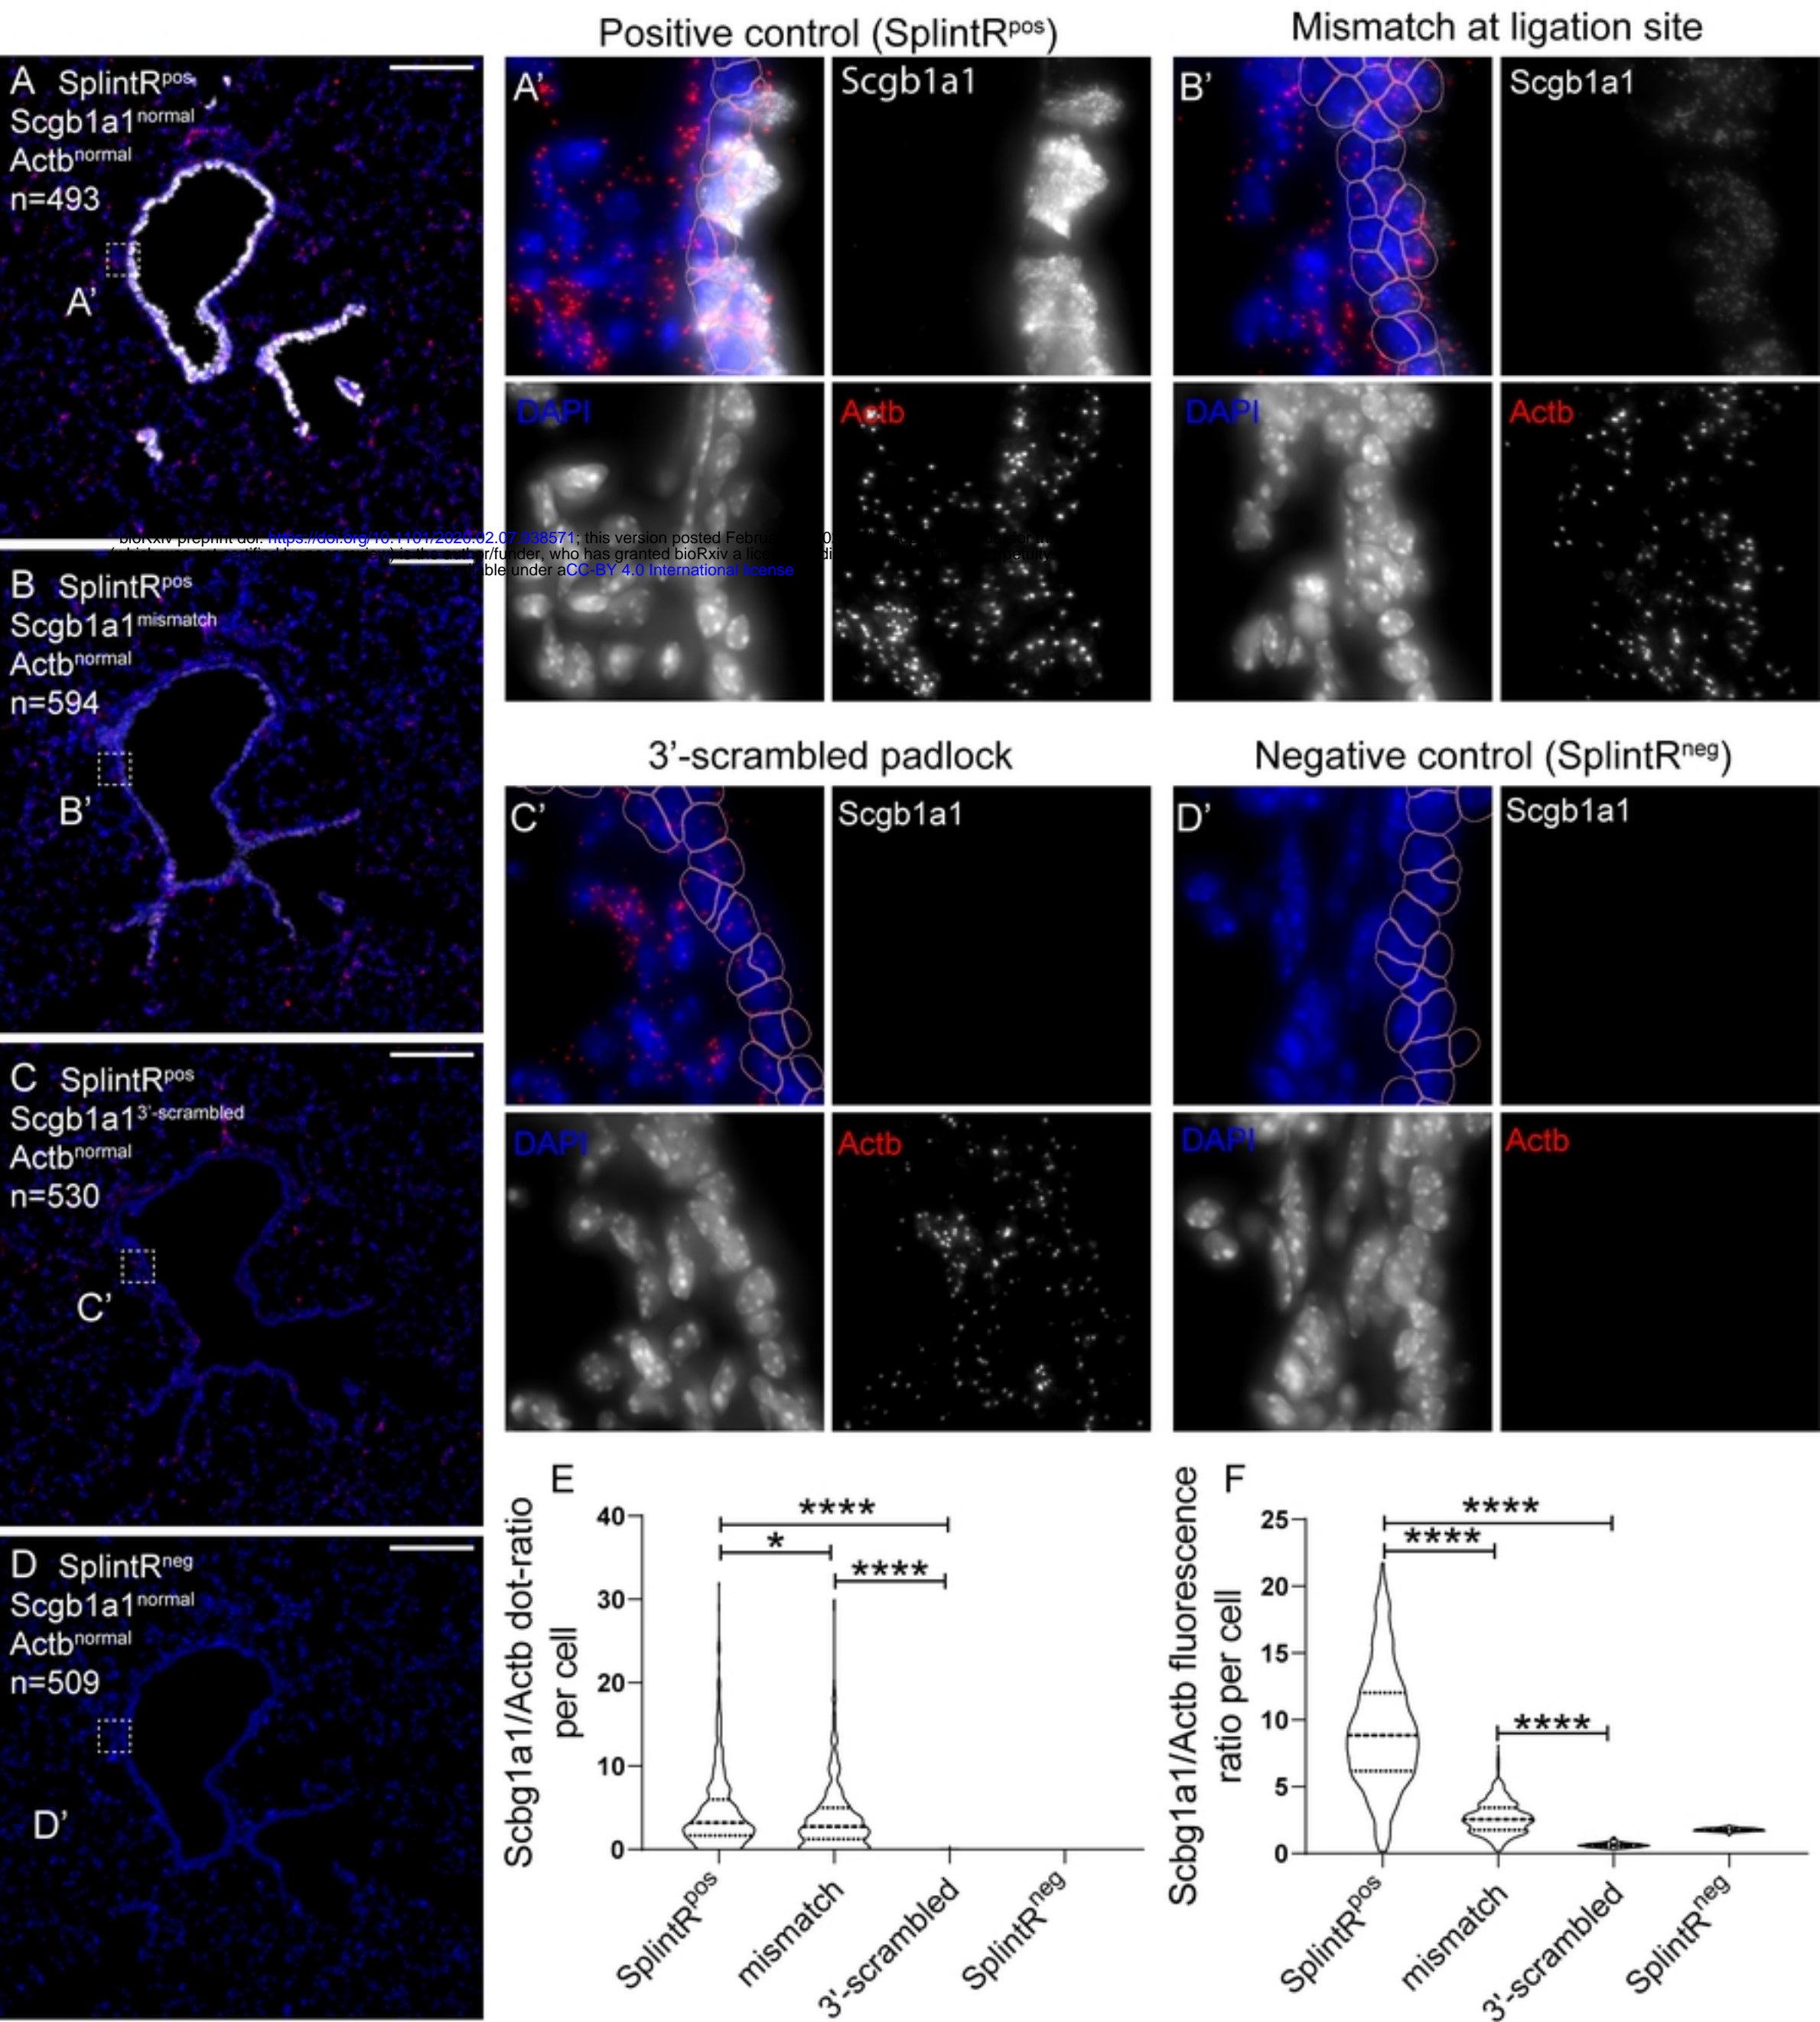

Figure\_2



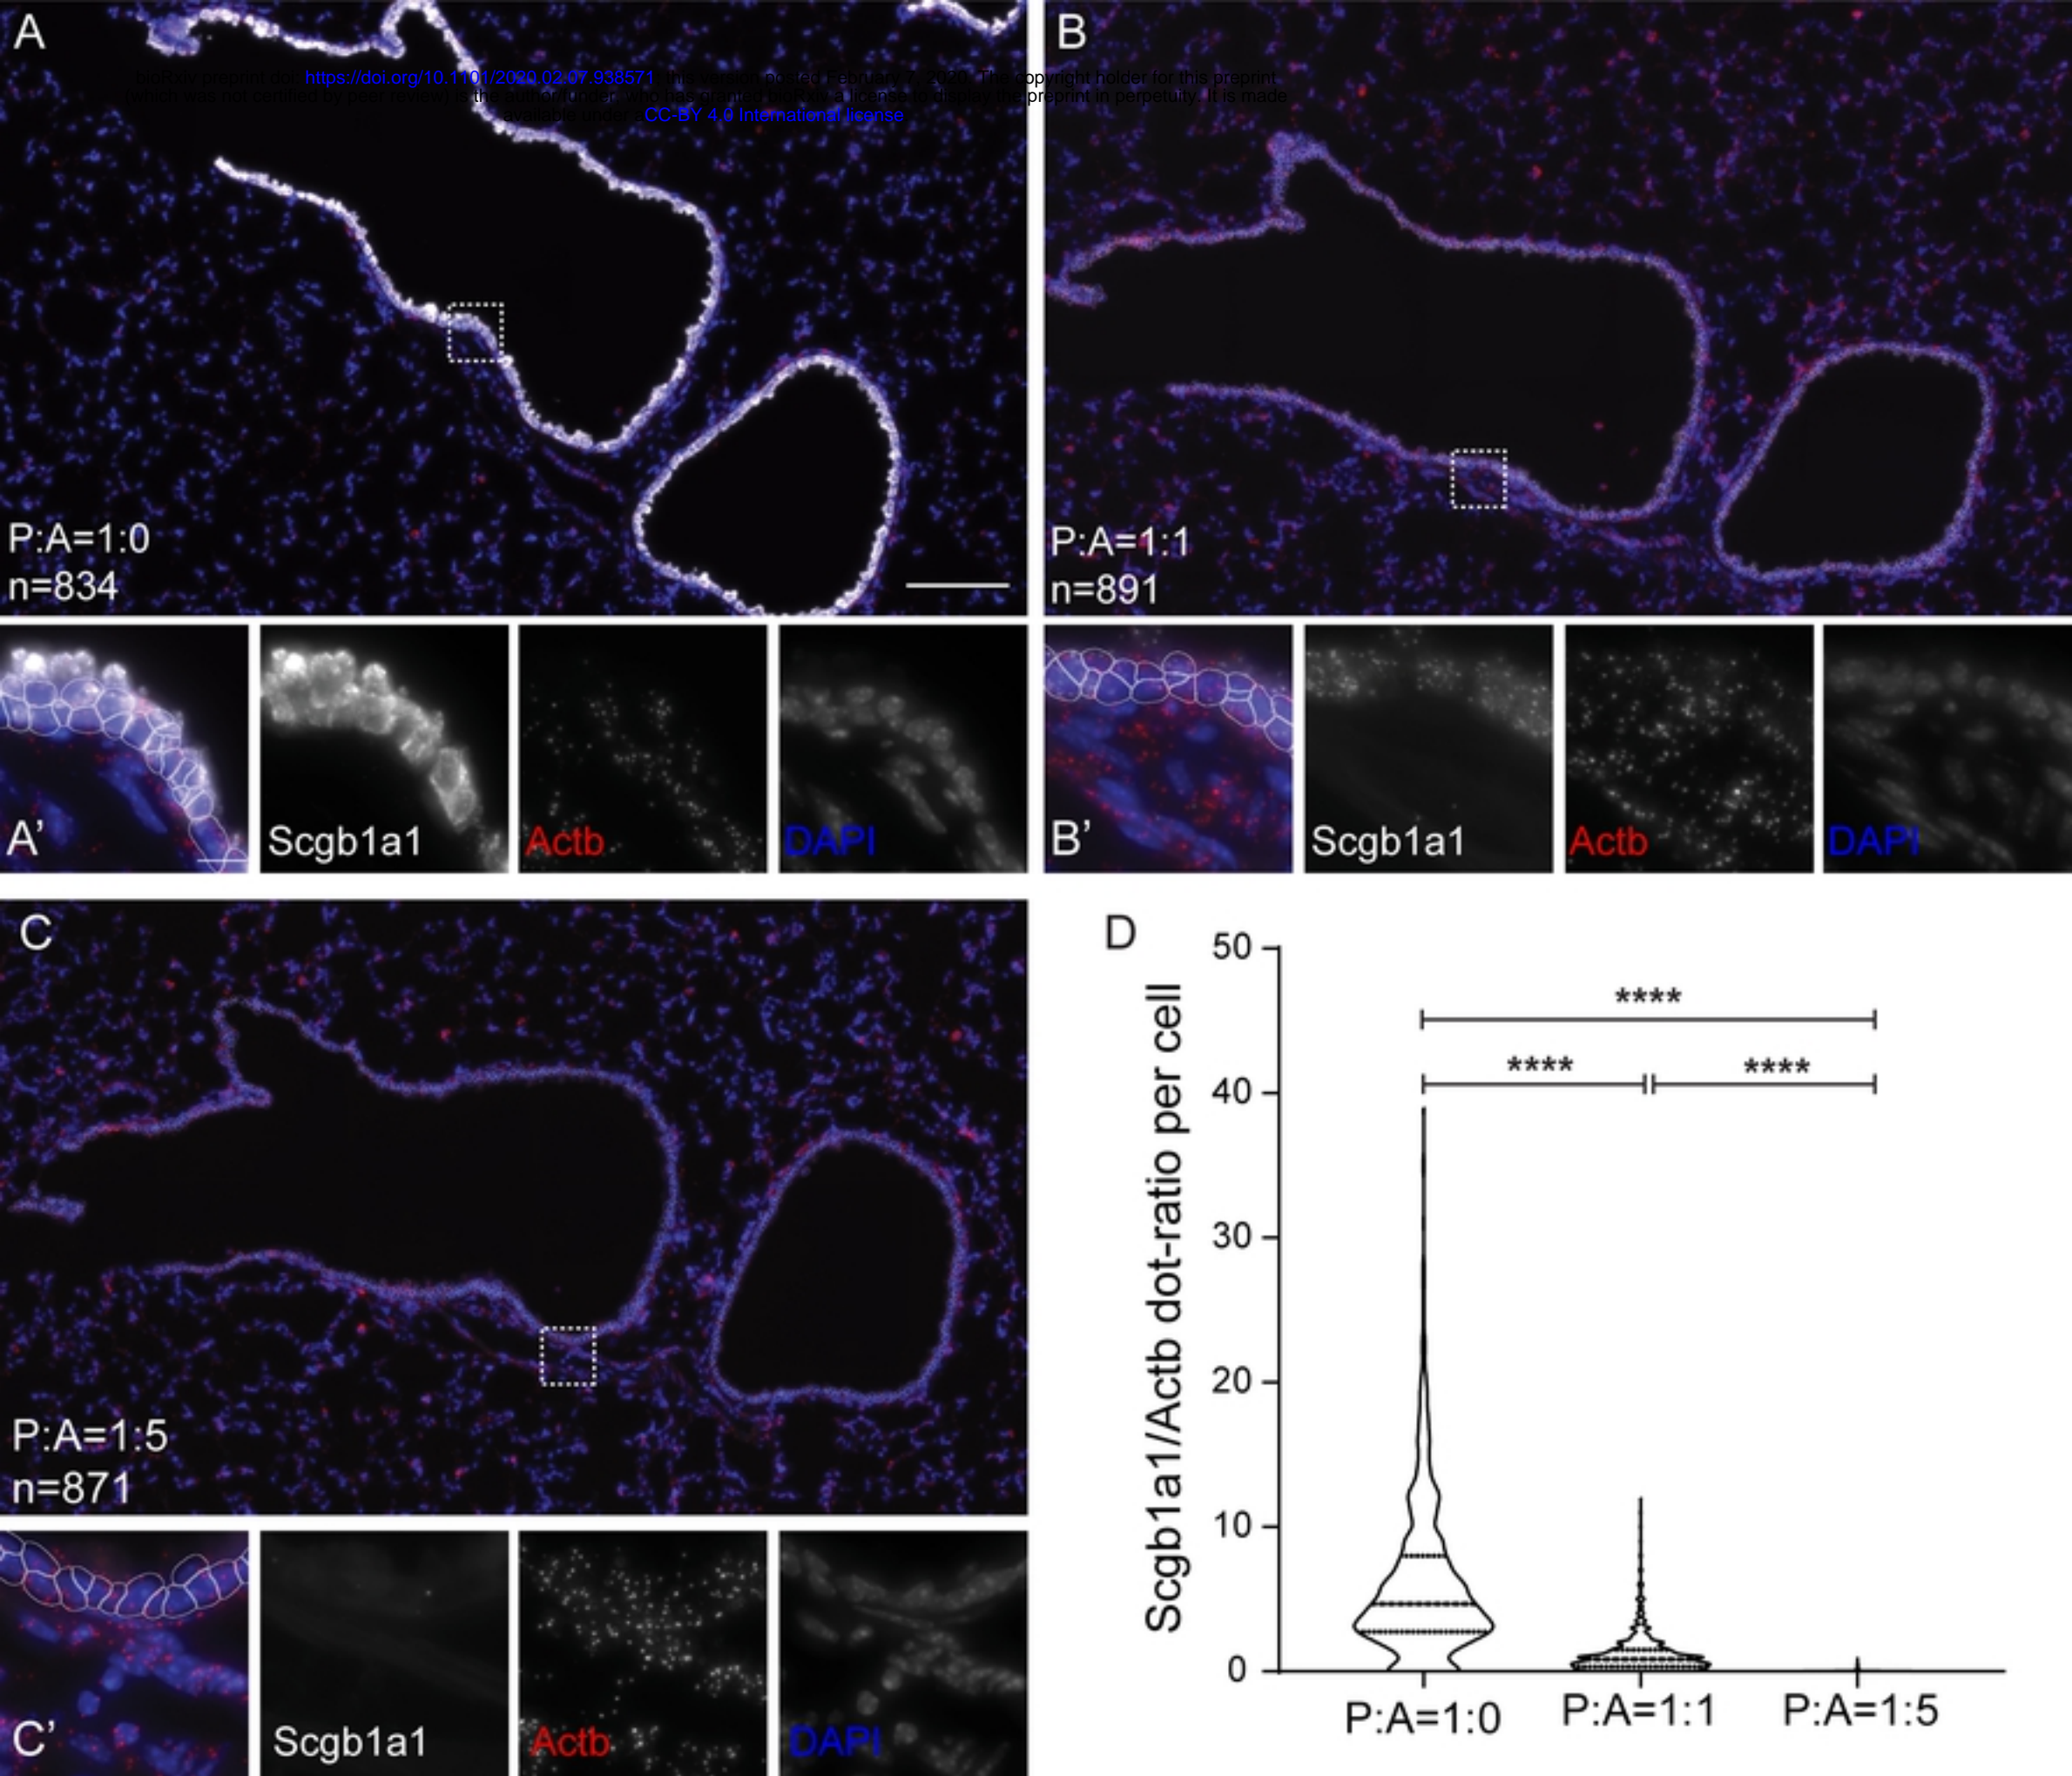

Figure\_3

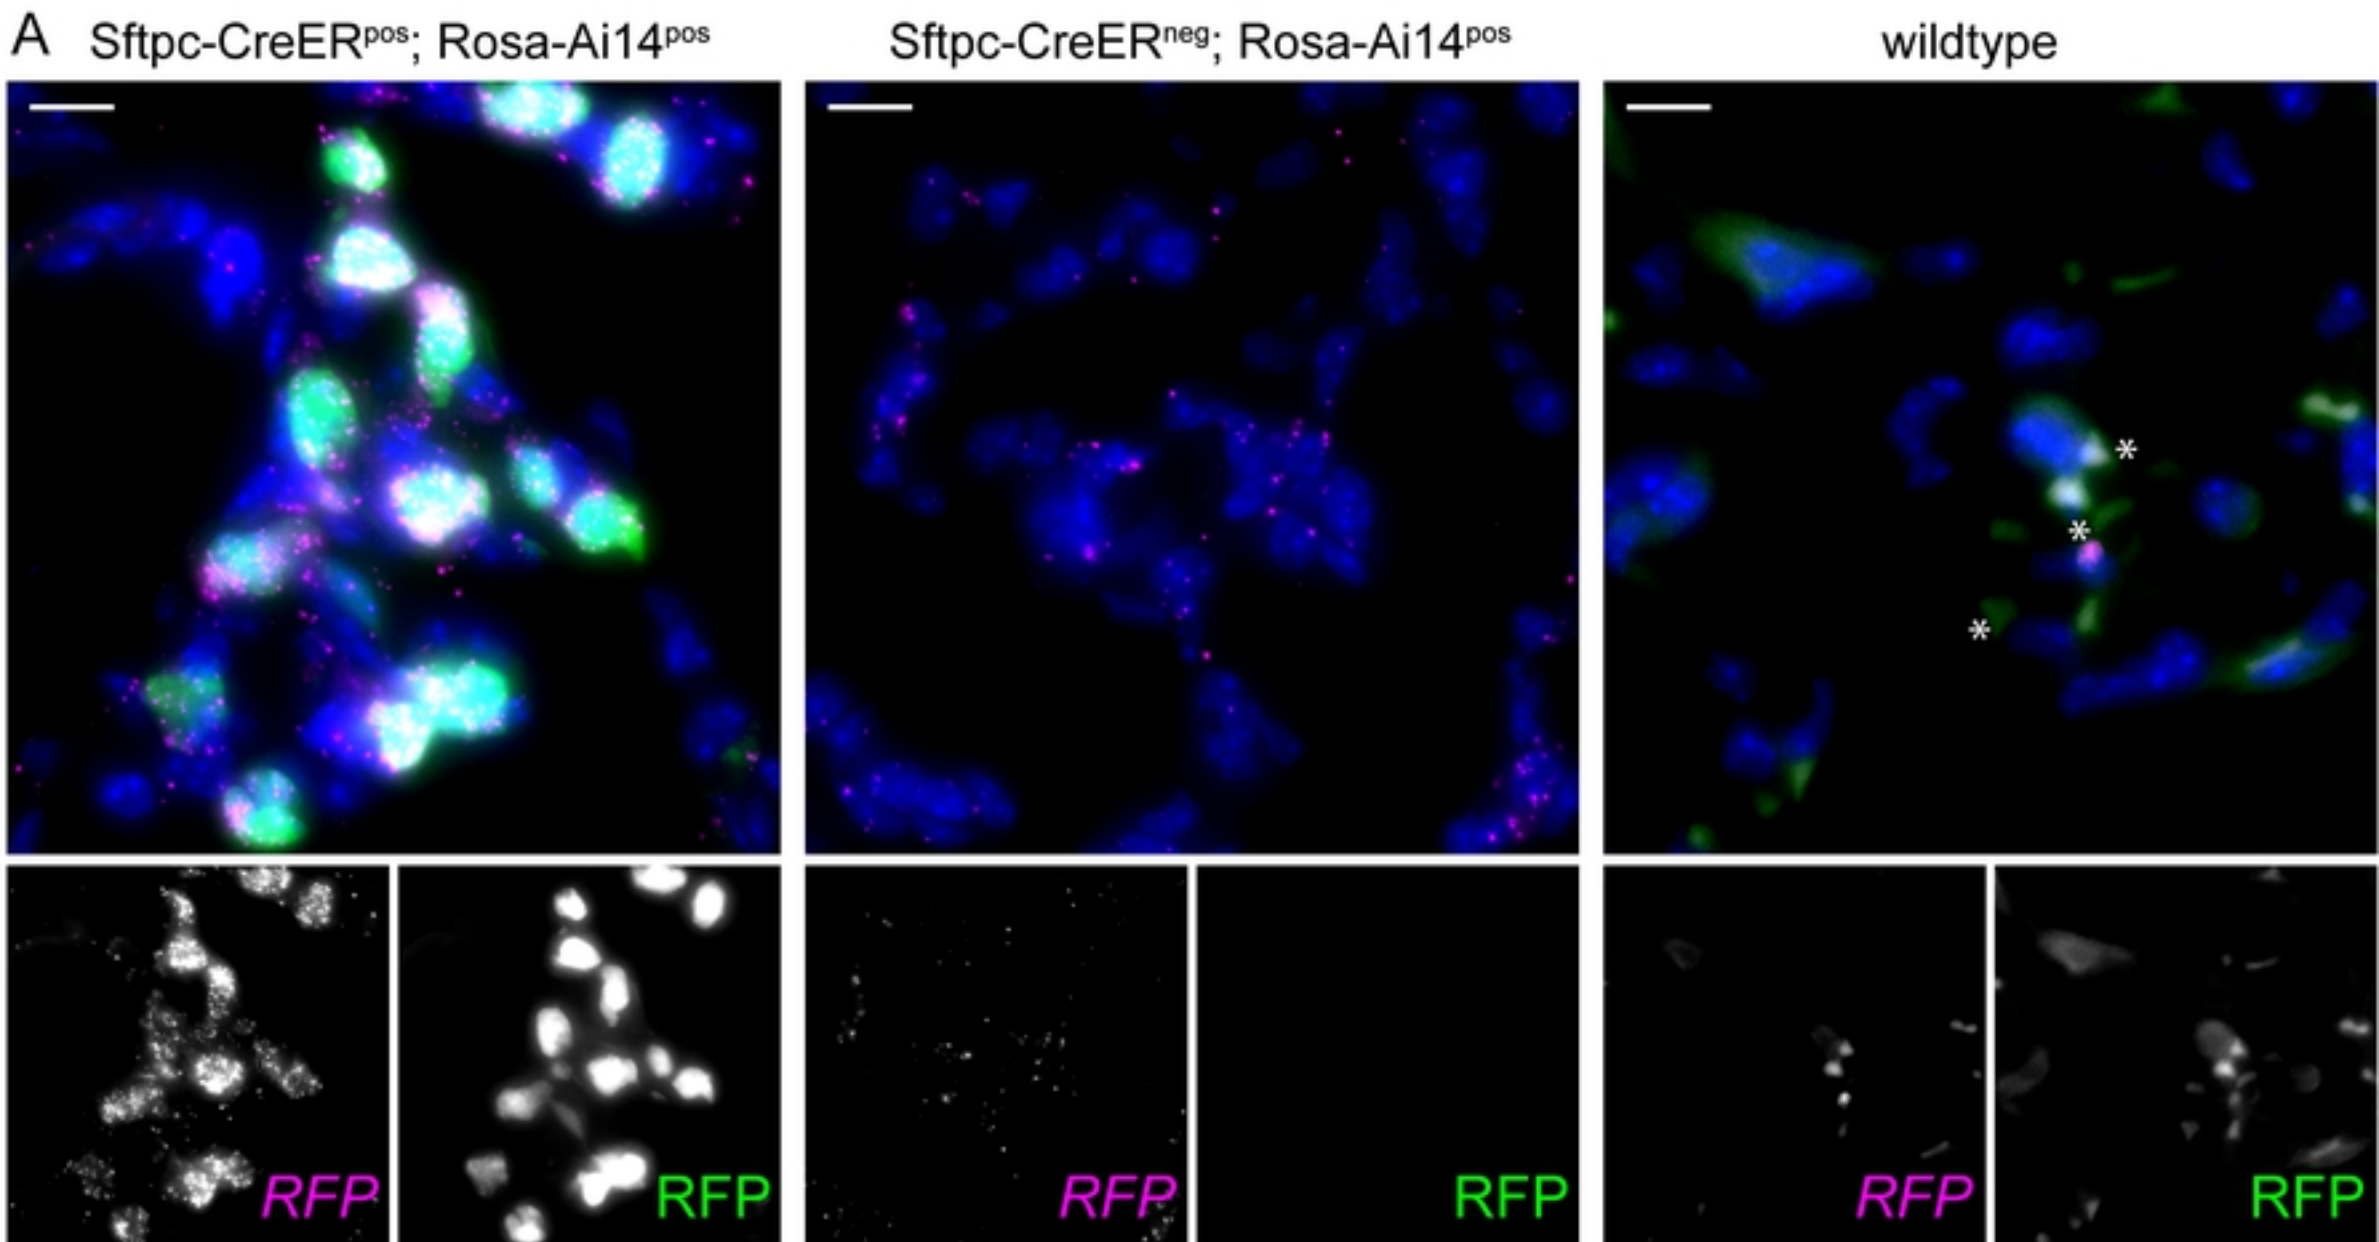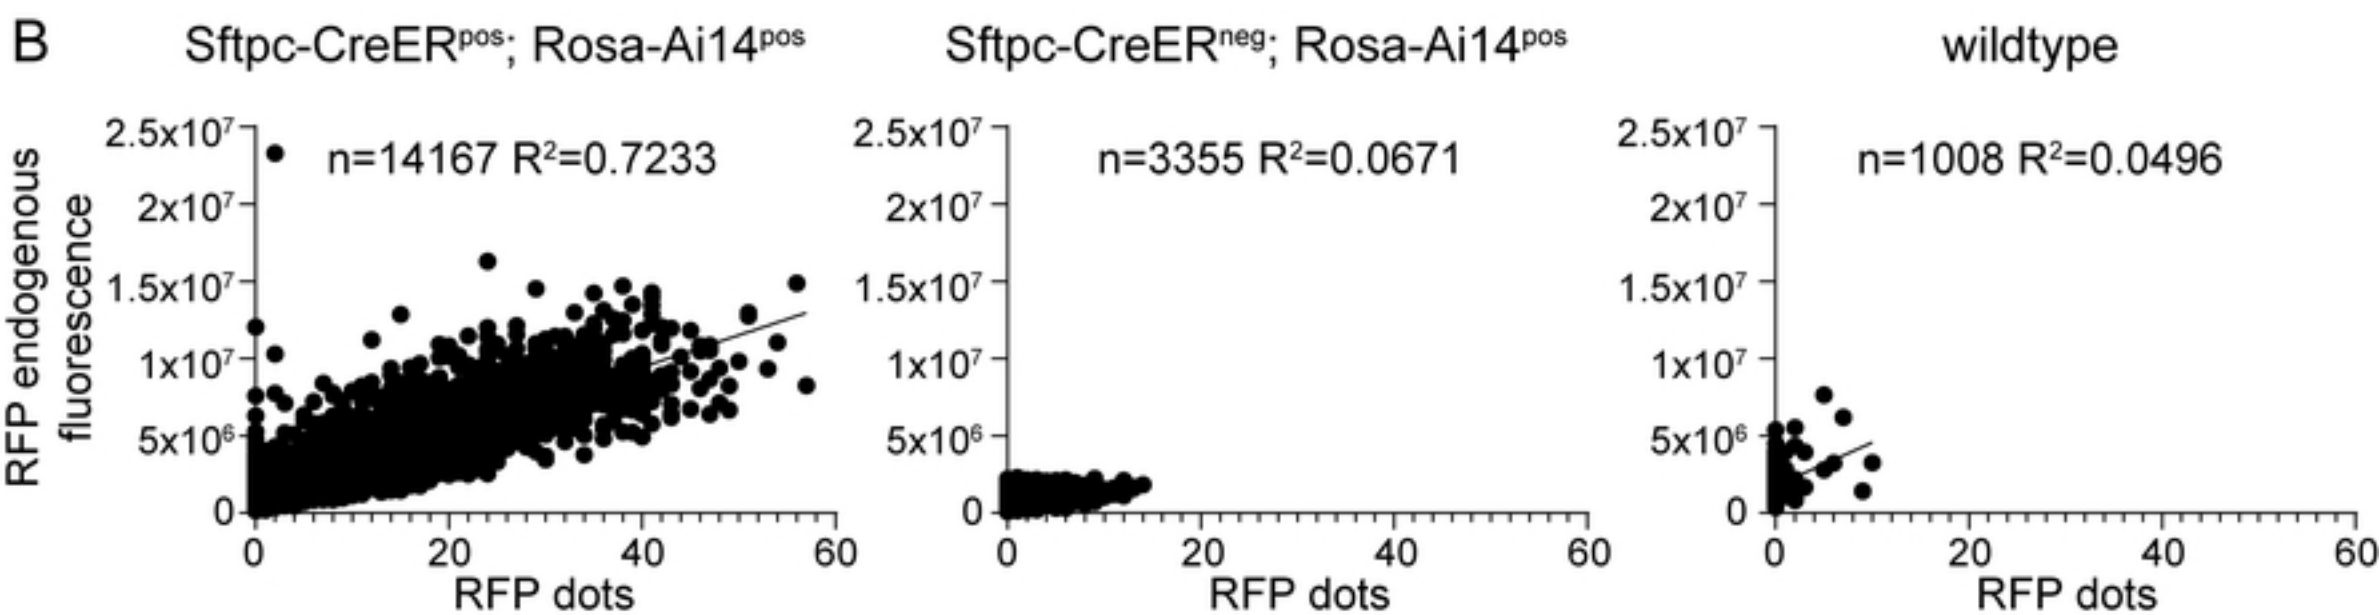

Figure\_4



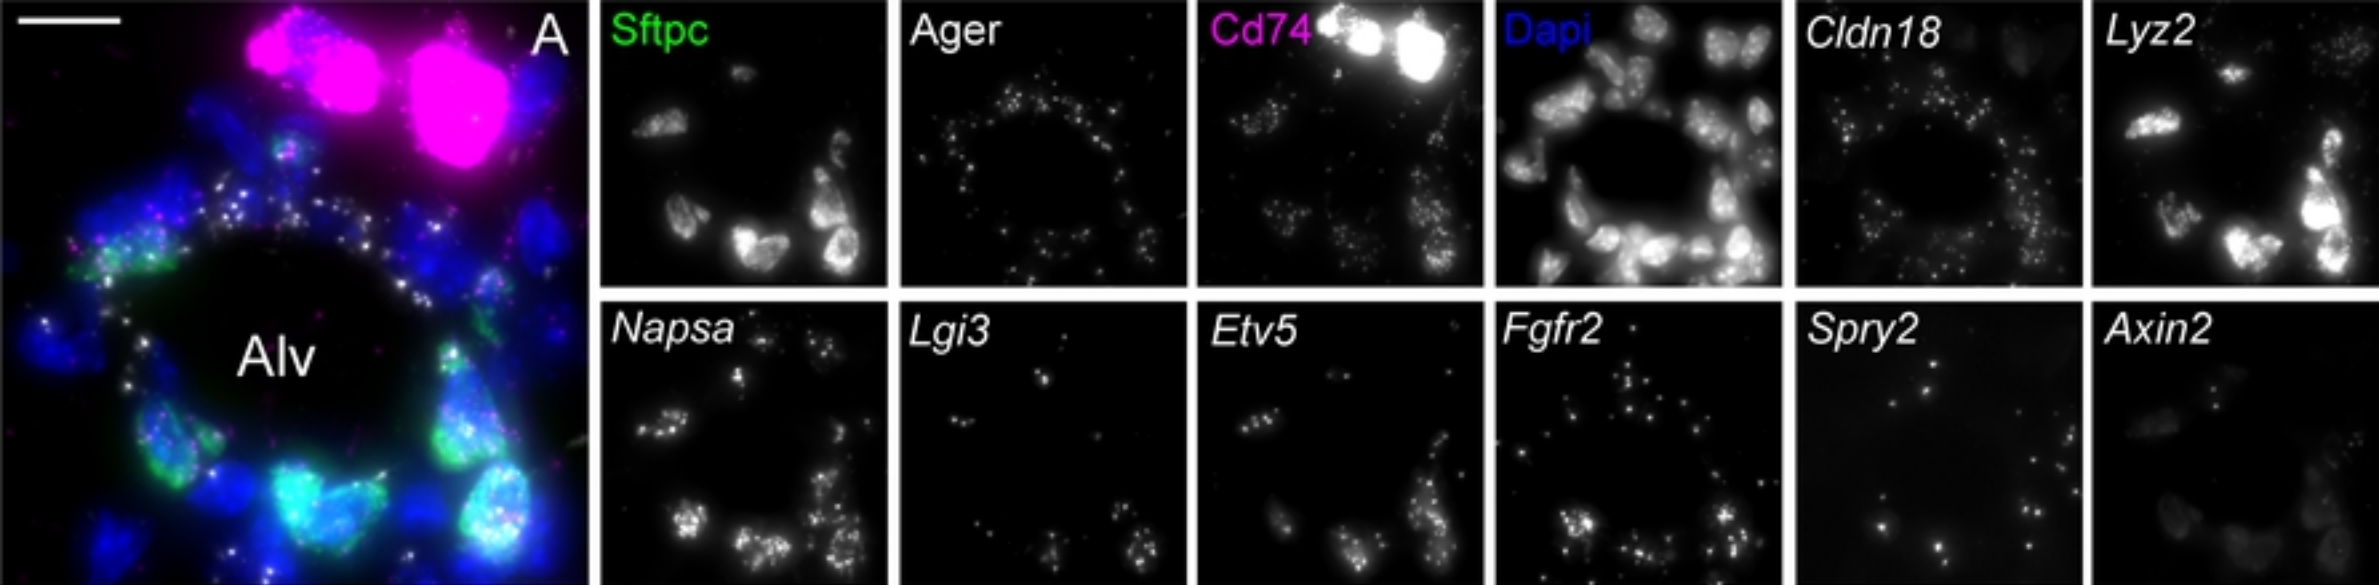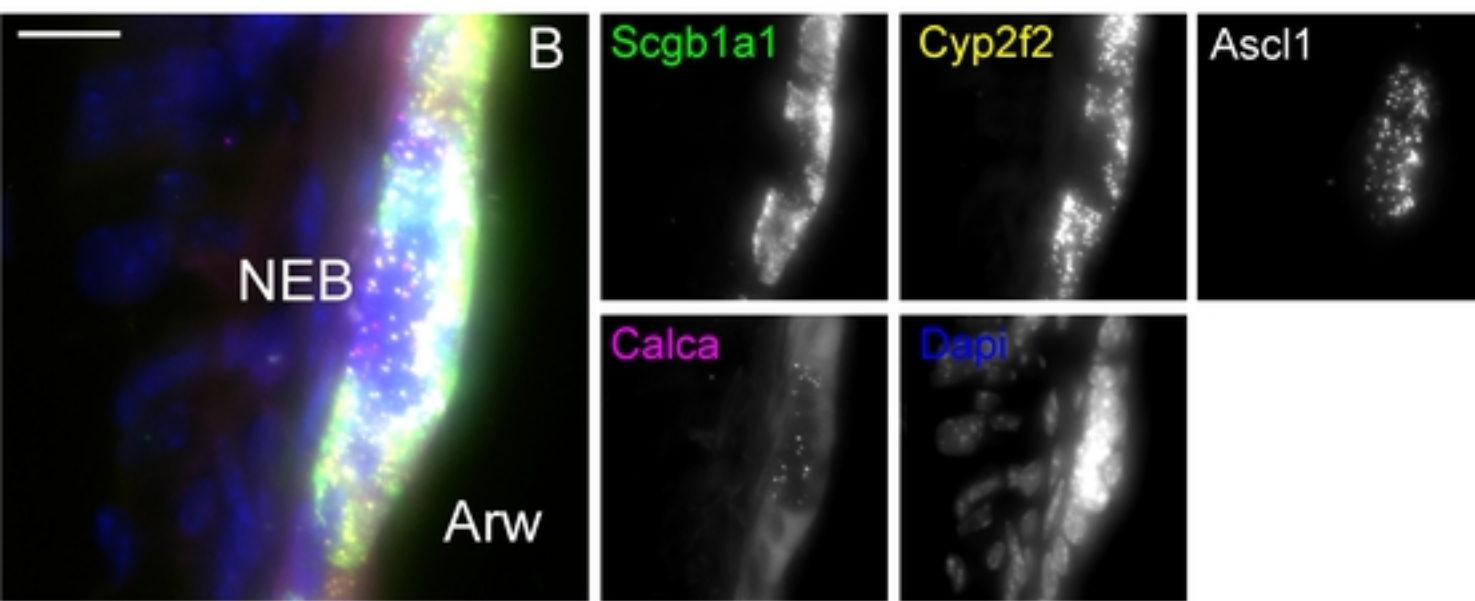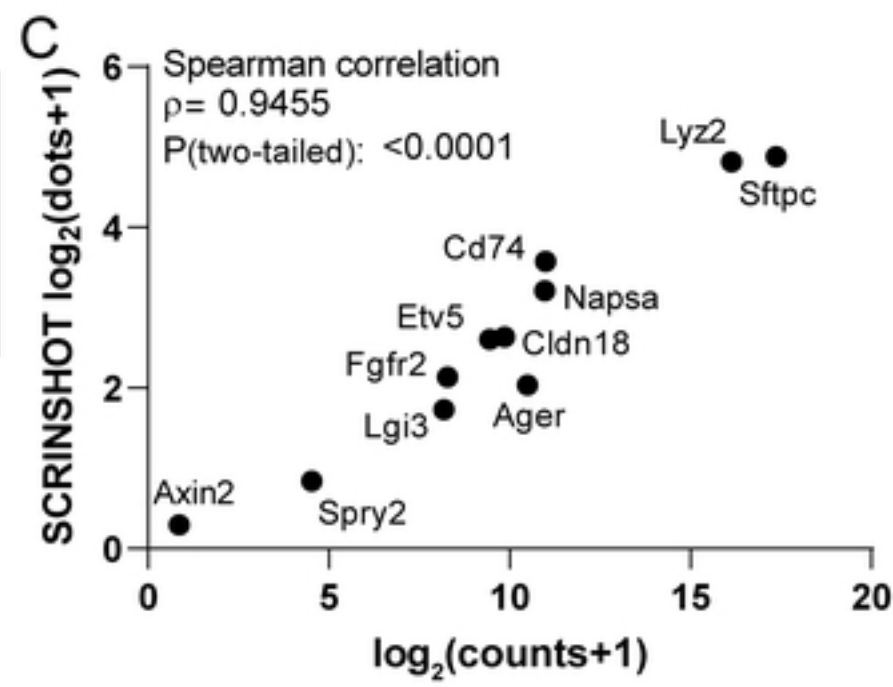

Figure\_6



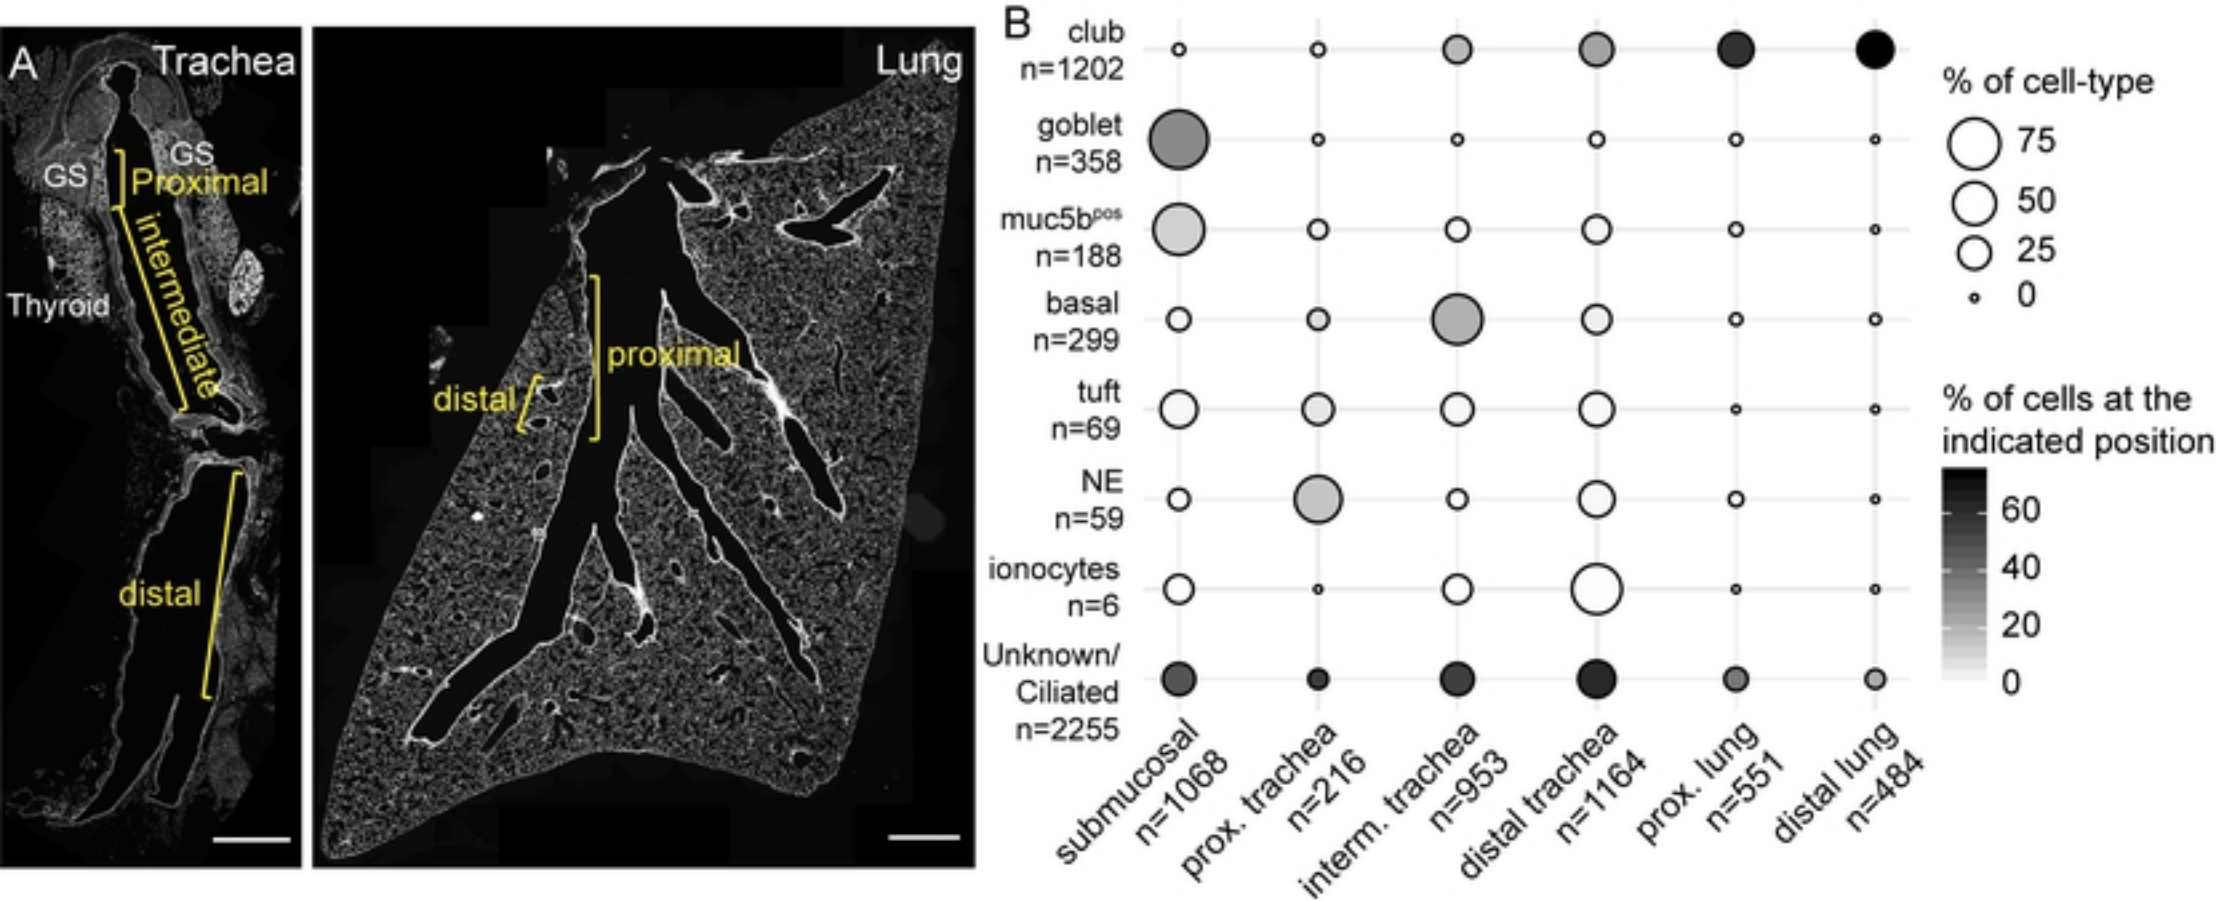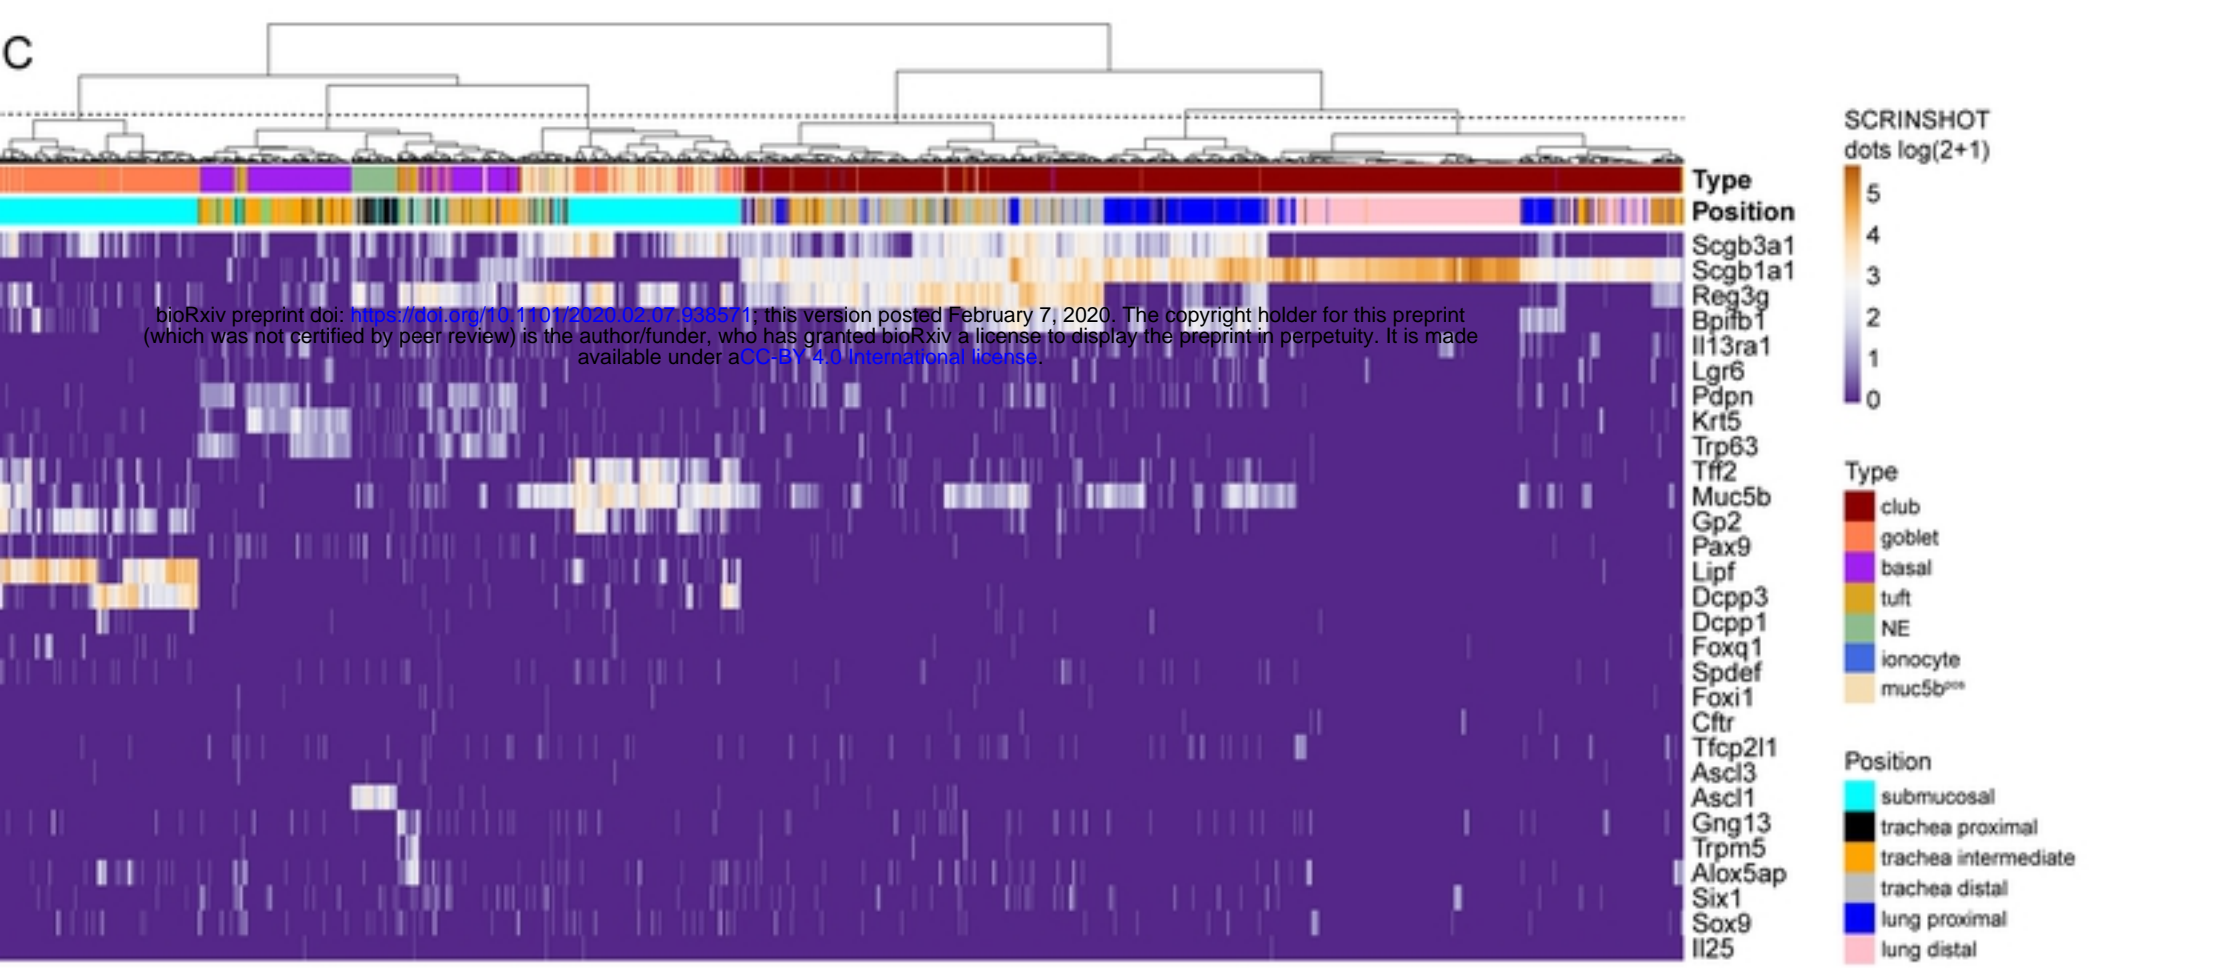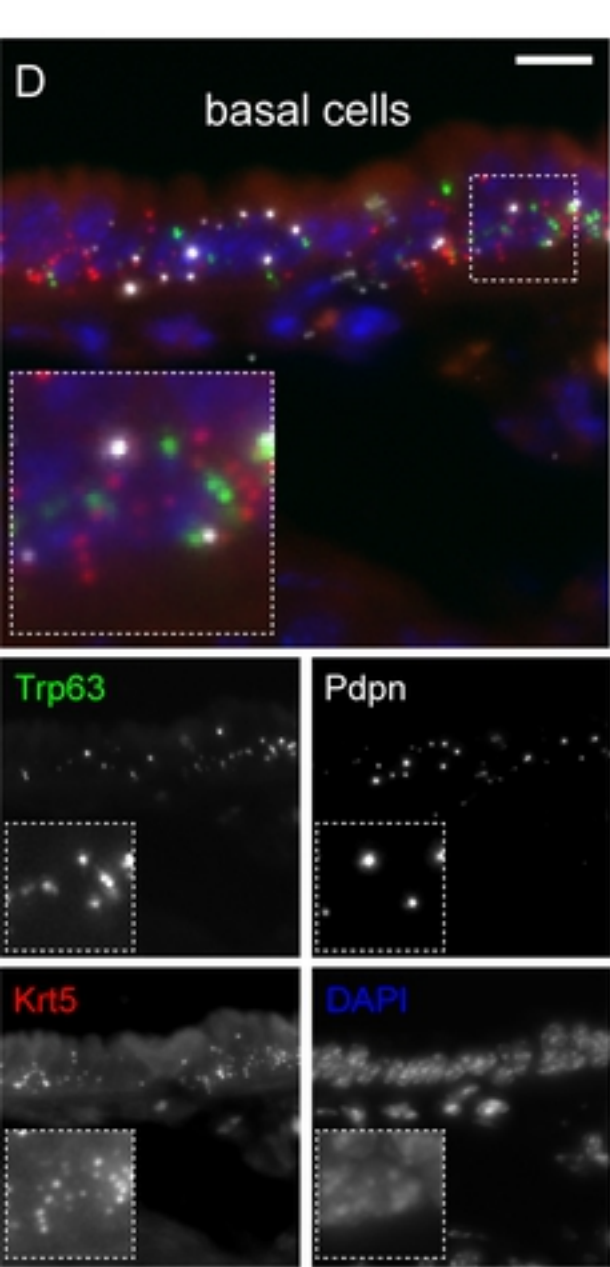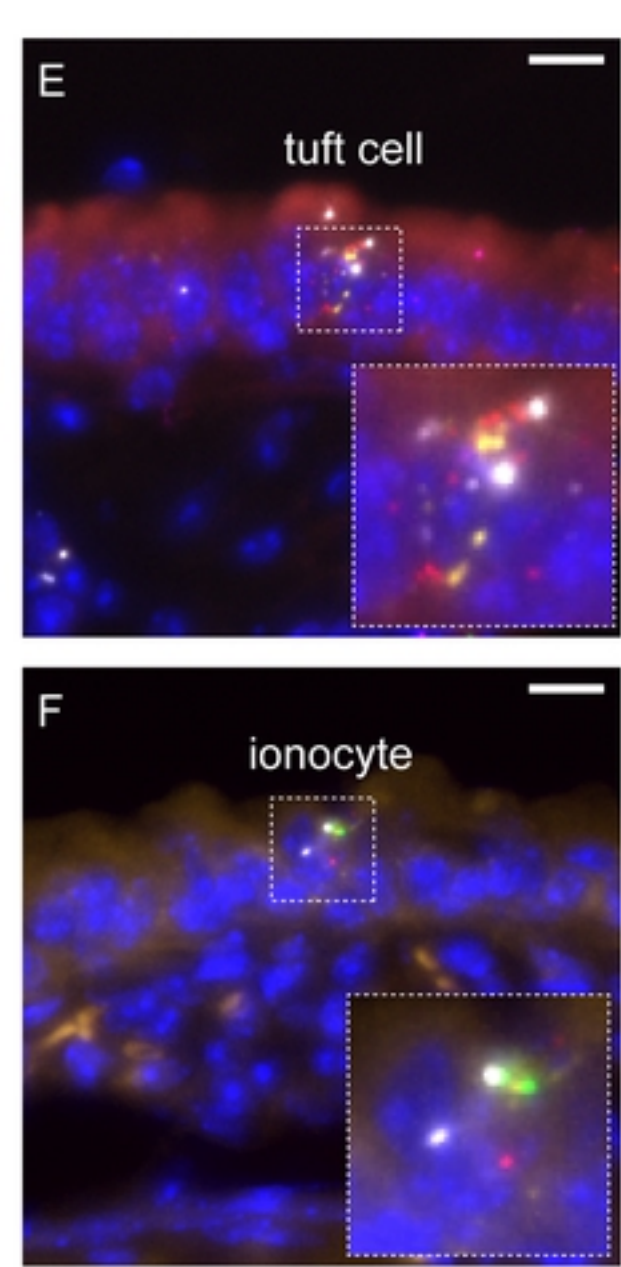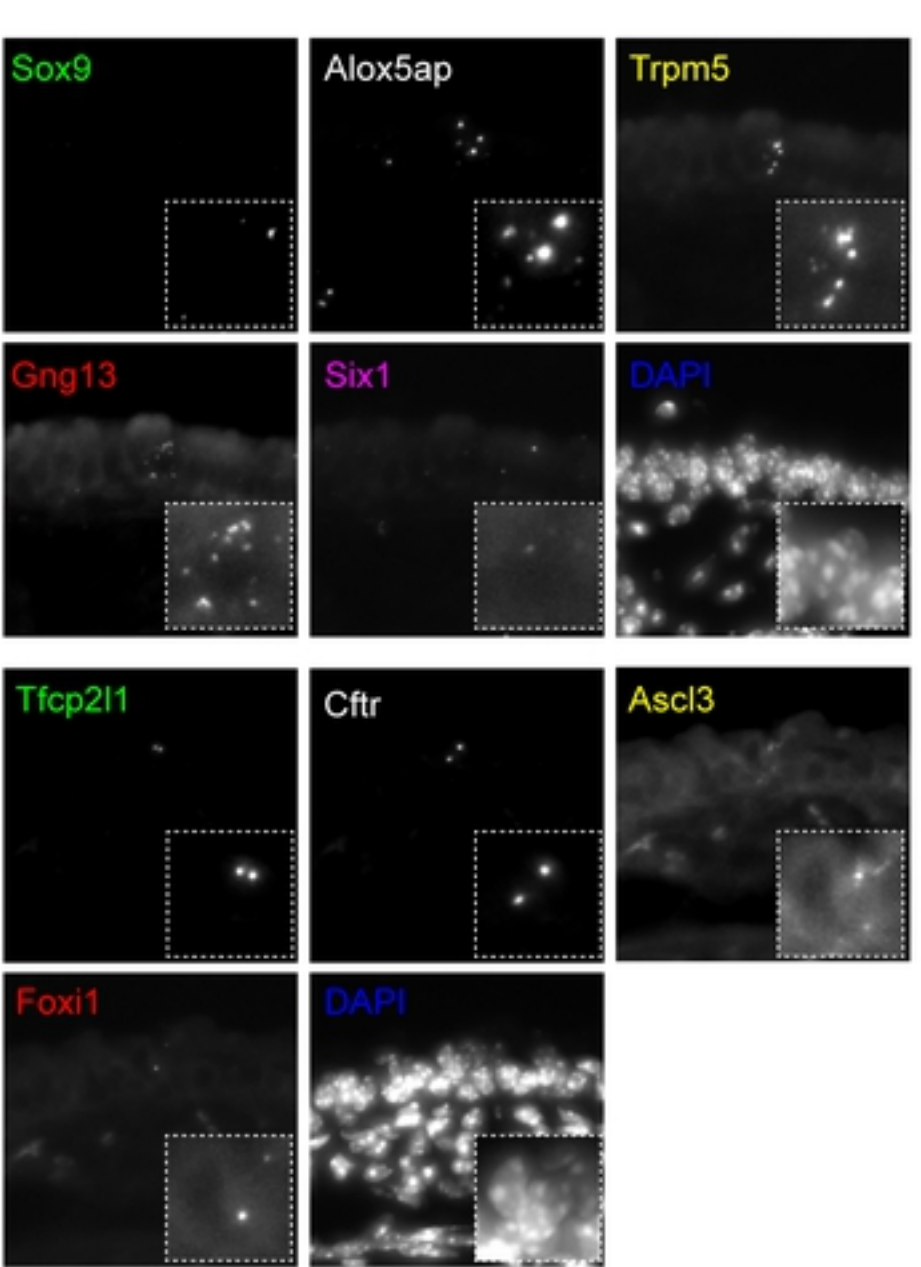

Figure\_7



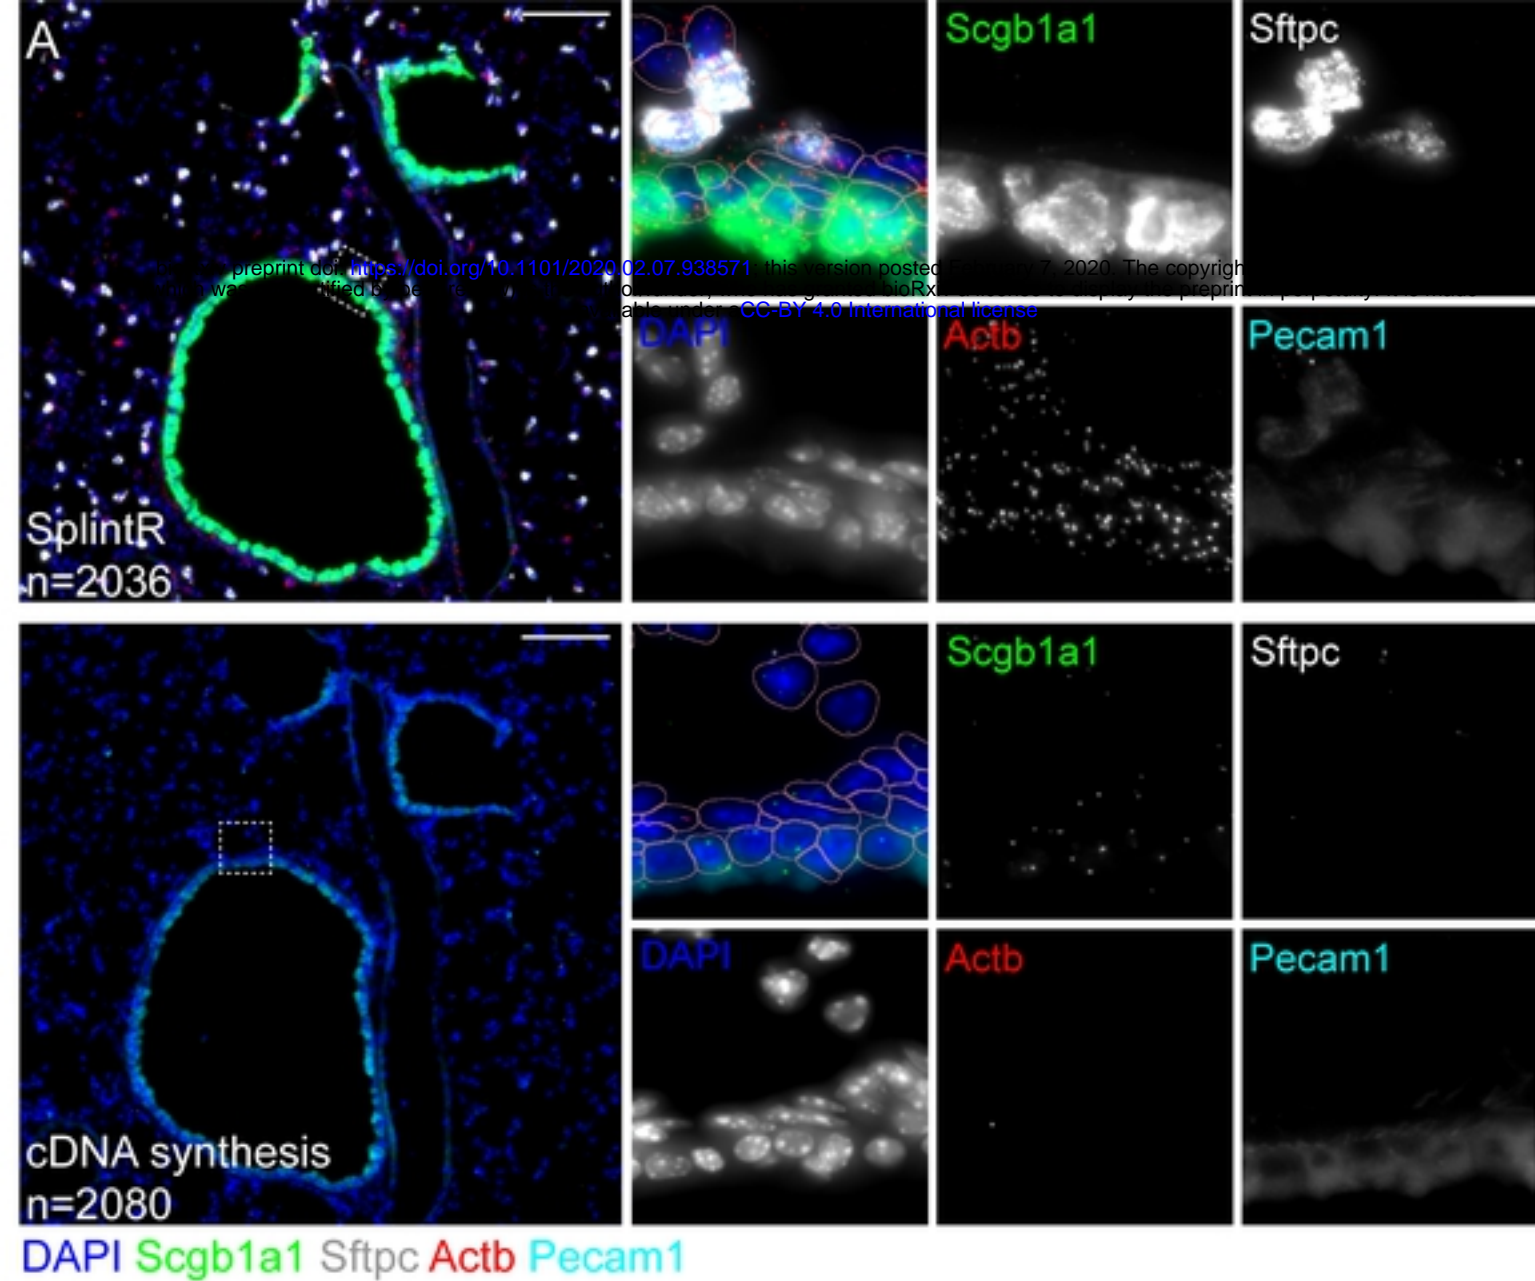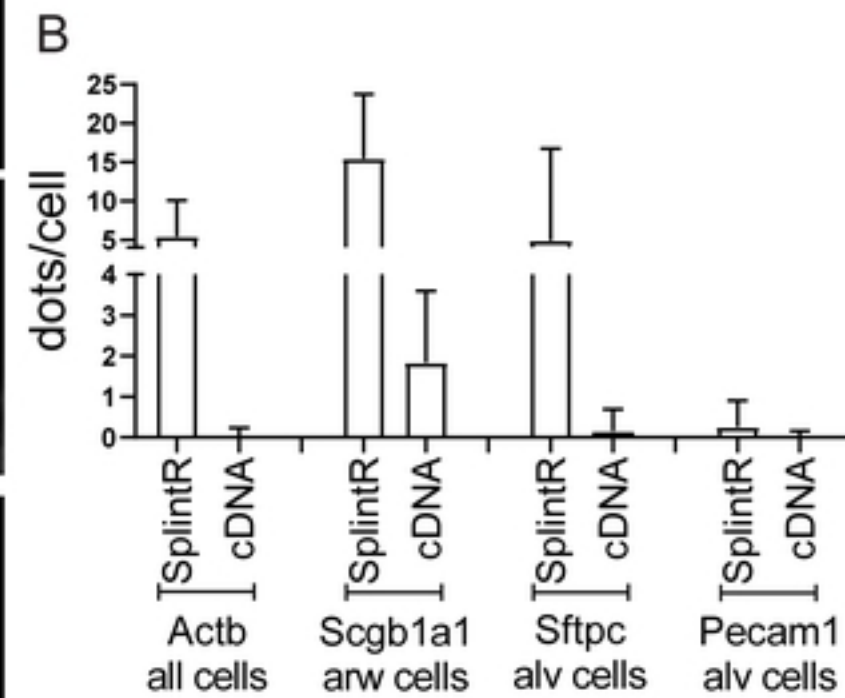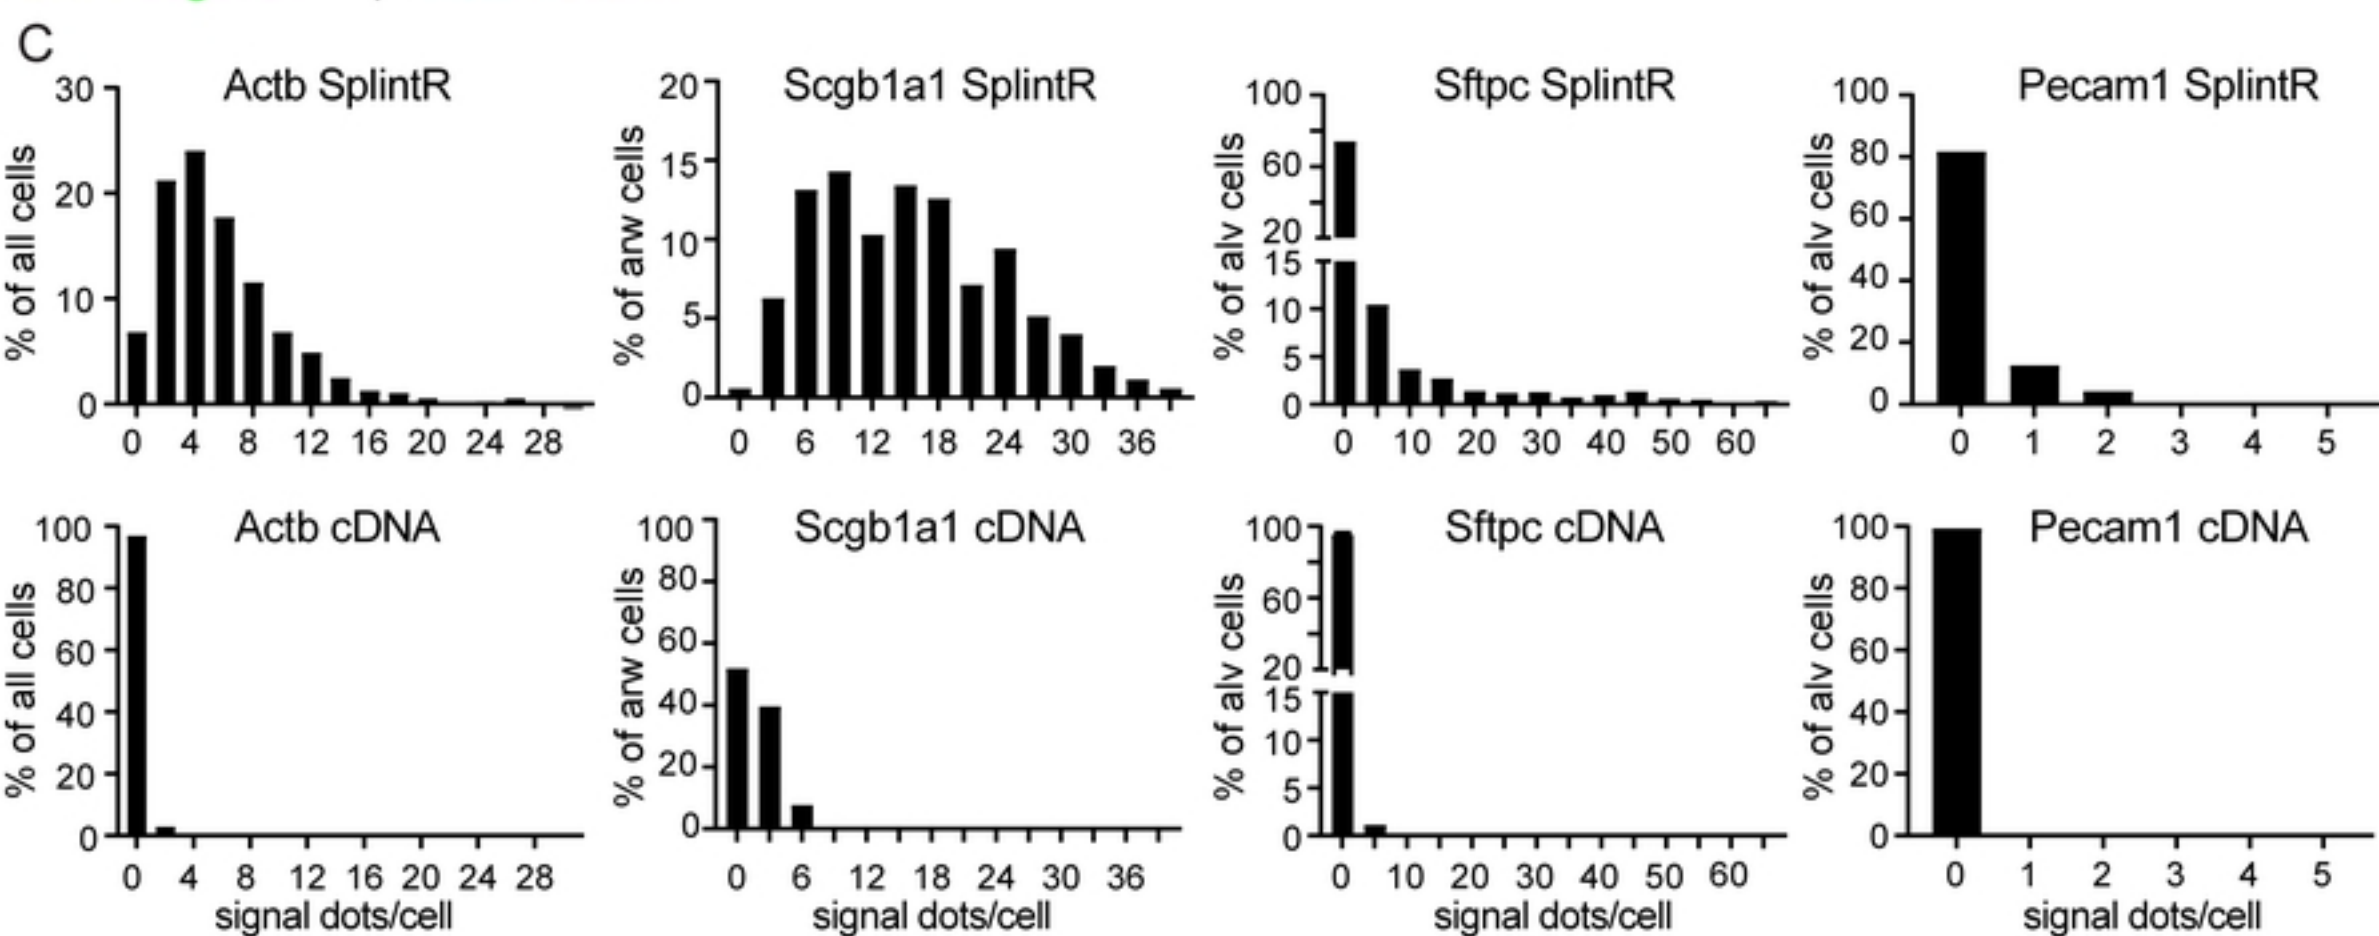



# P60 mouse kidney

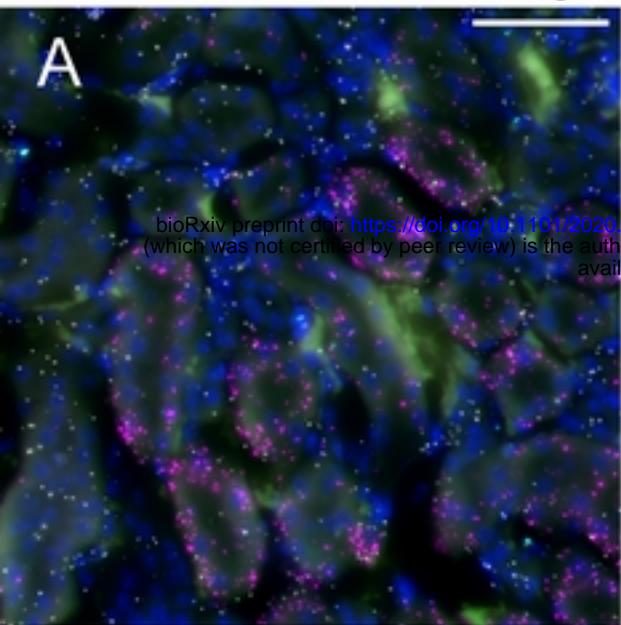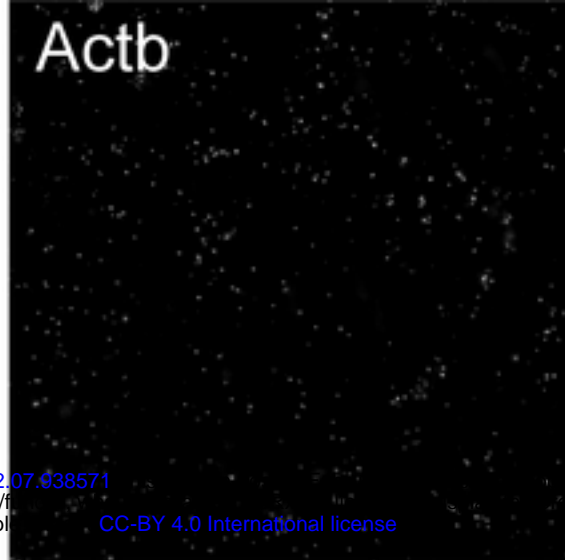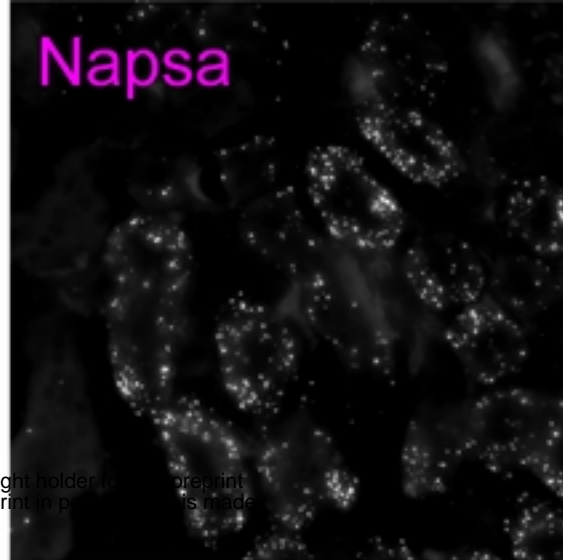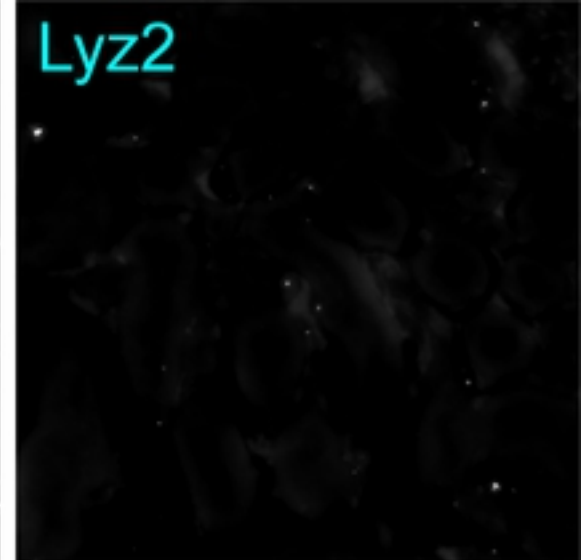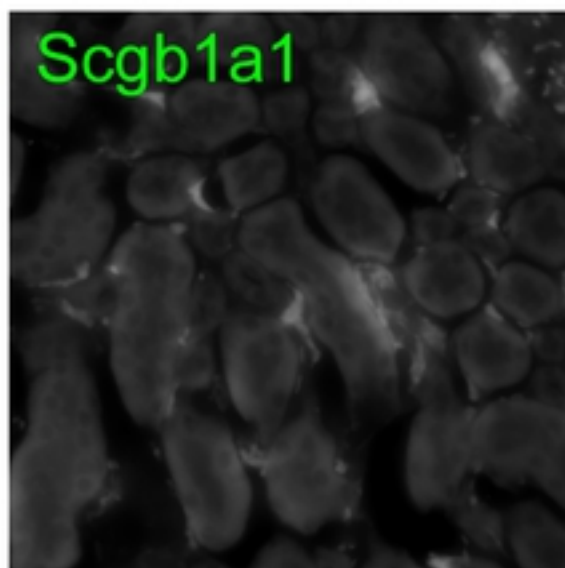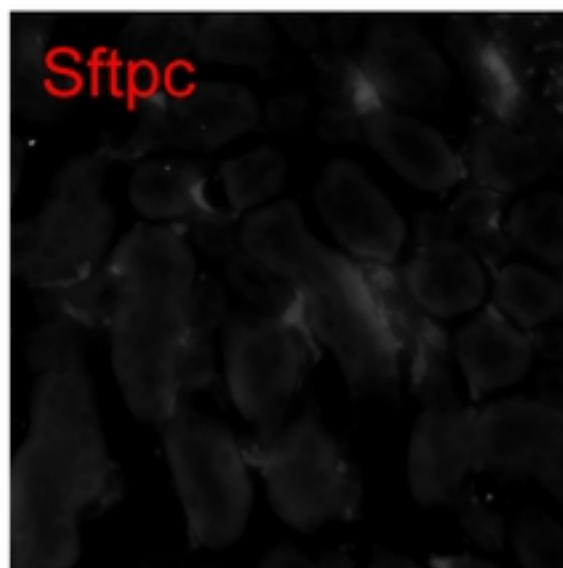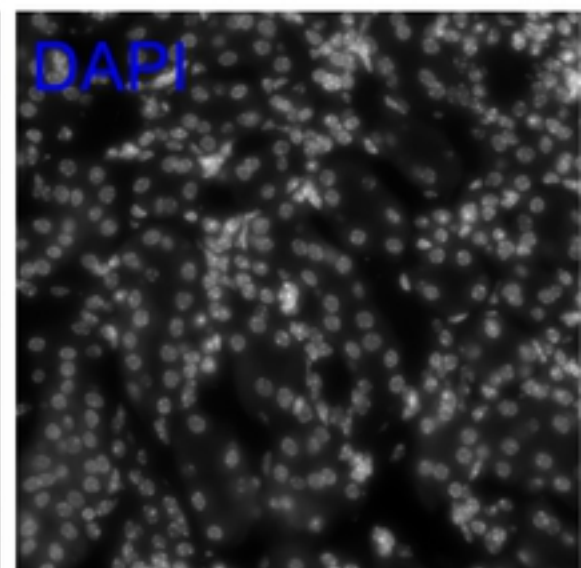

# P60 mouse heart

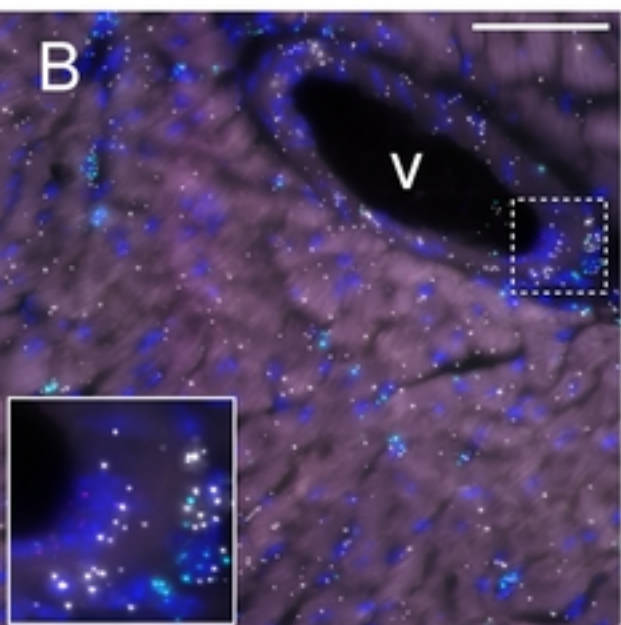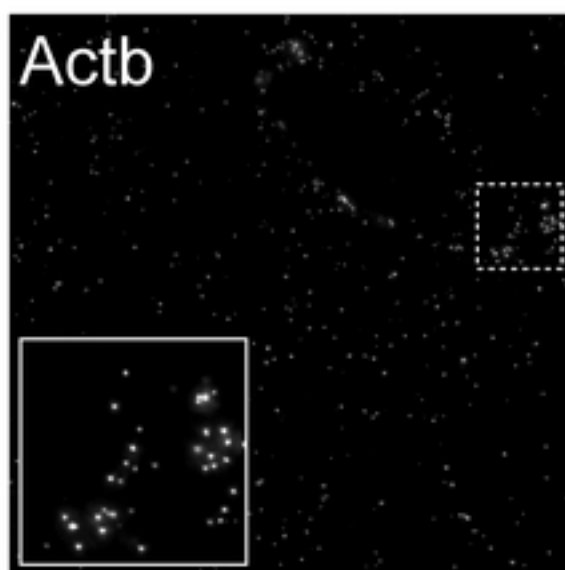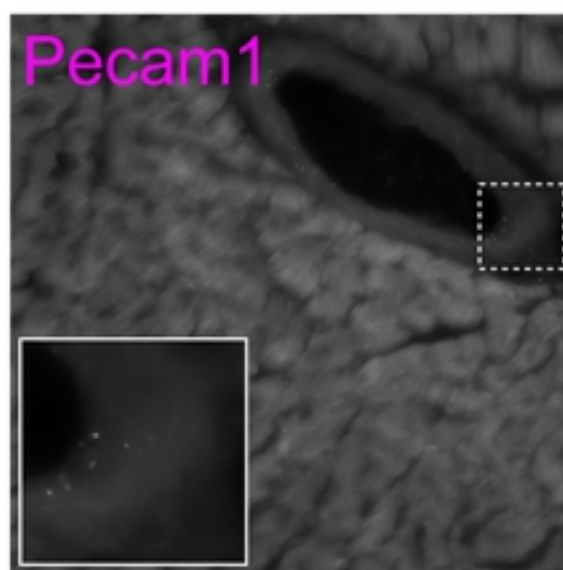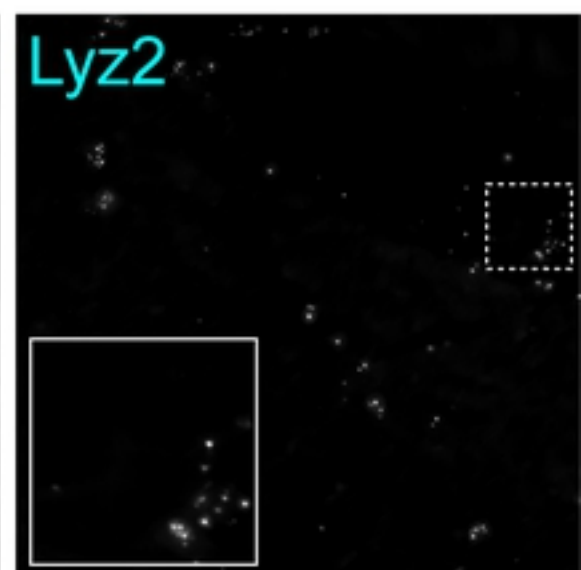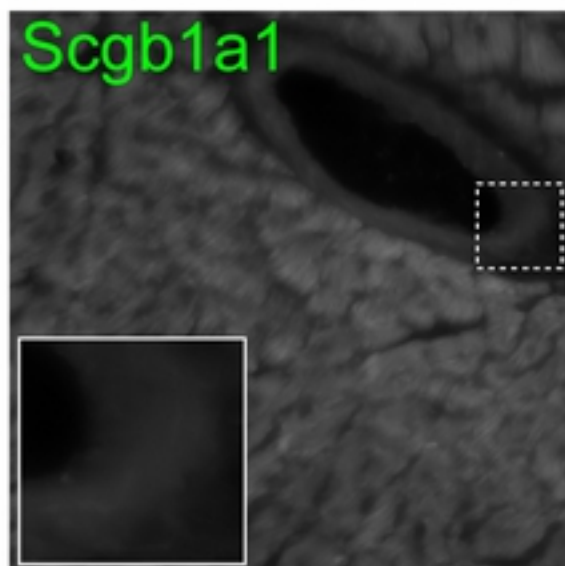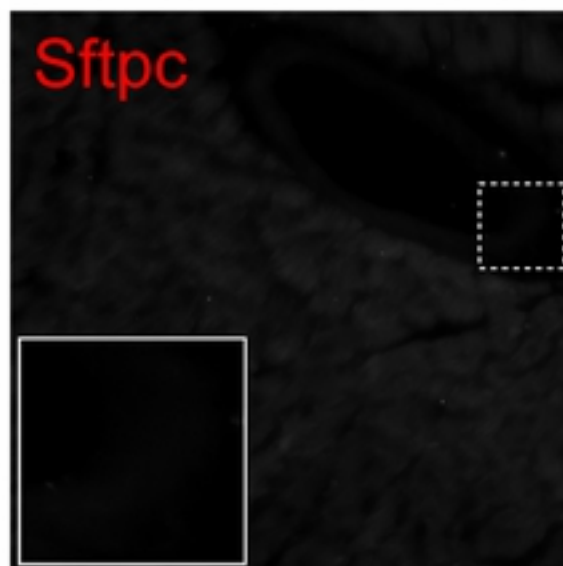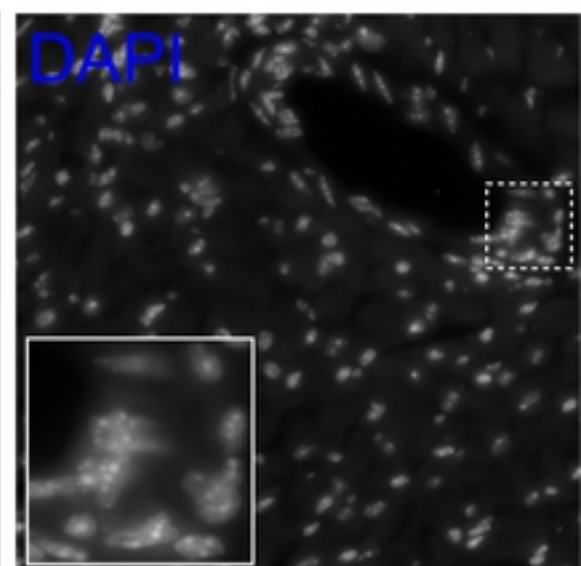



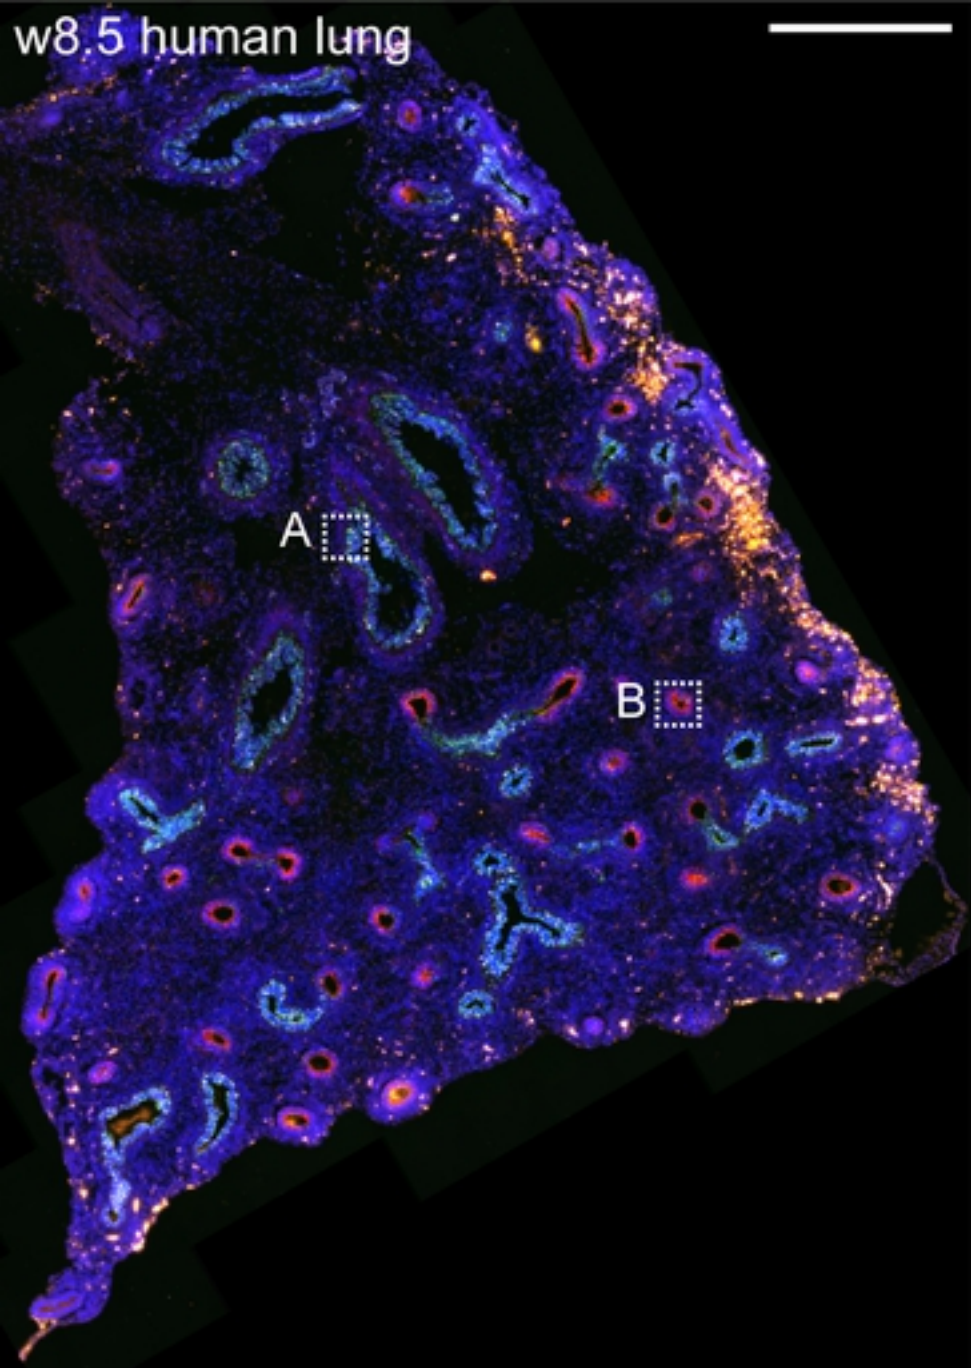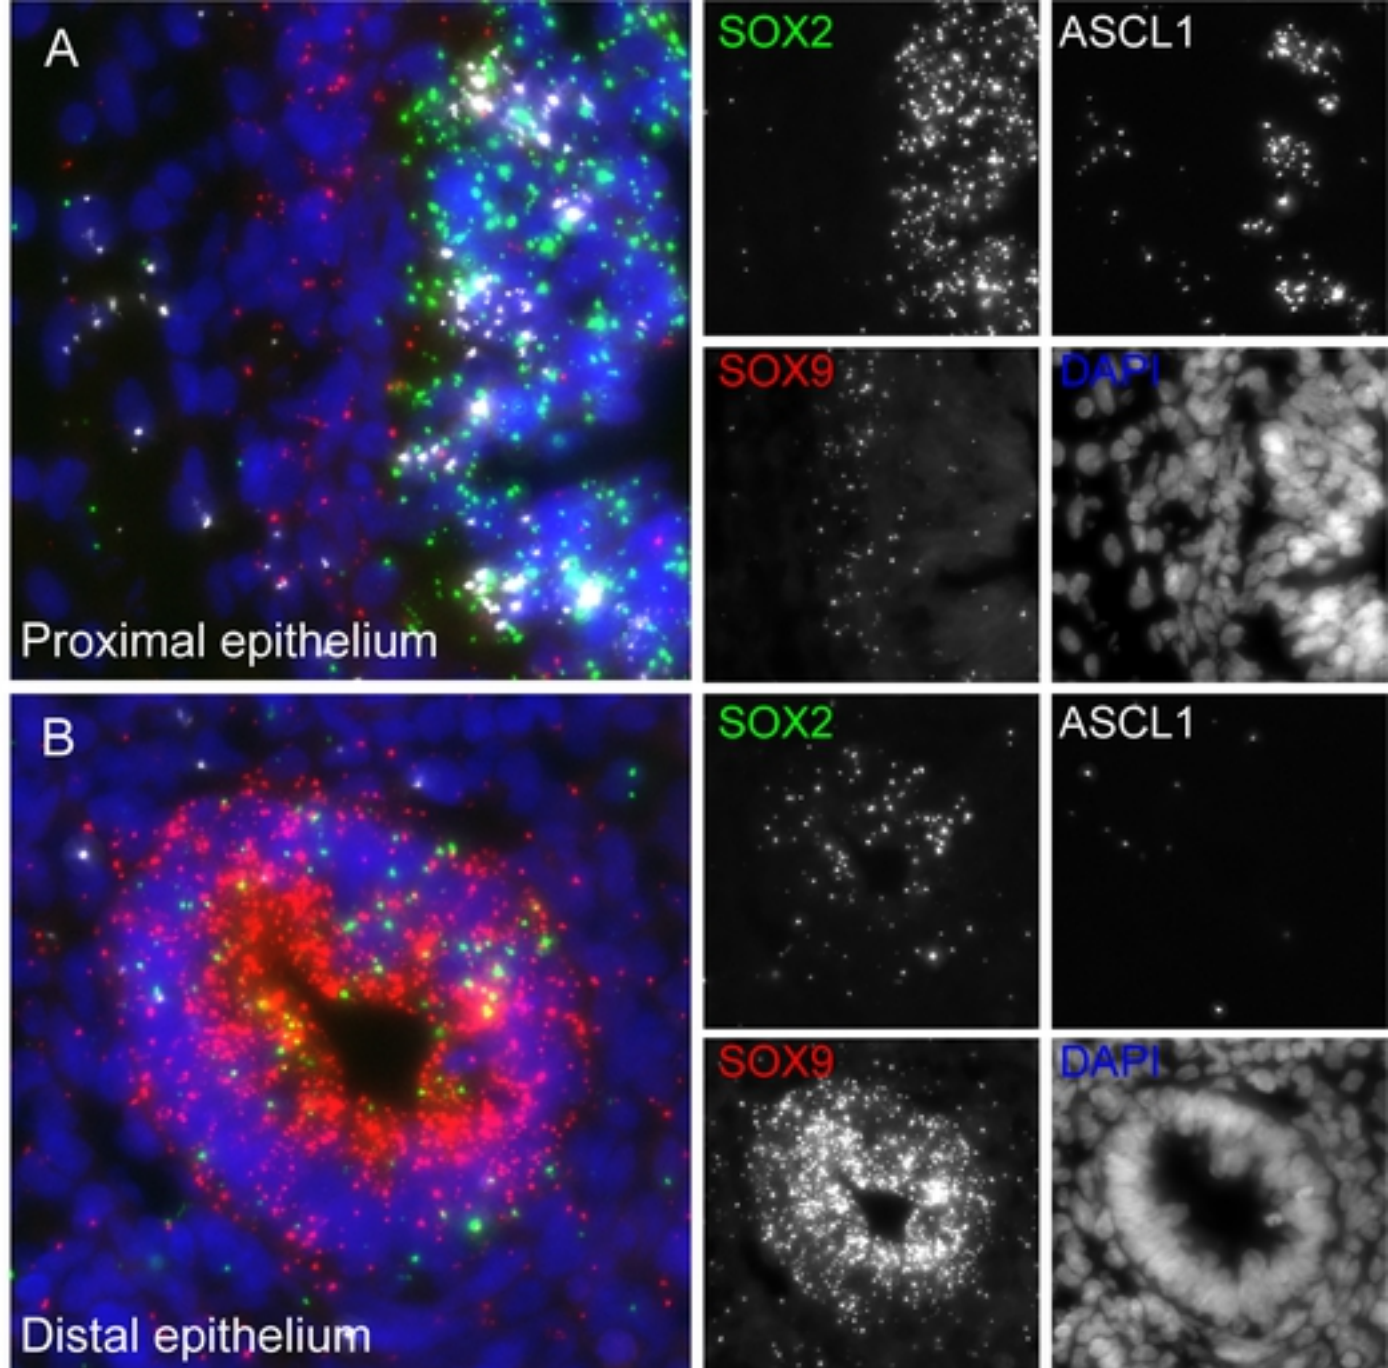

Suppl\_Figure\_3

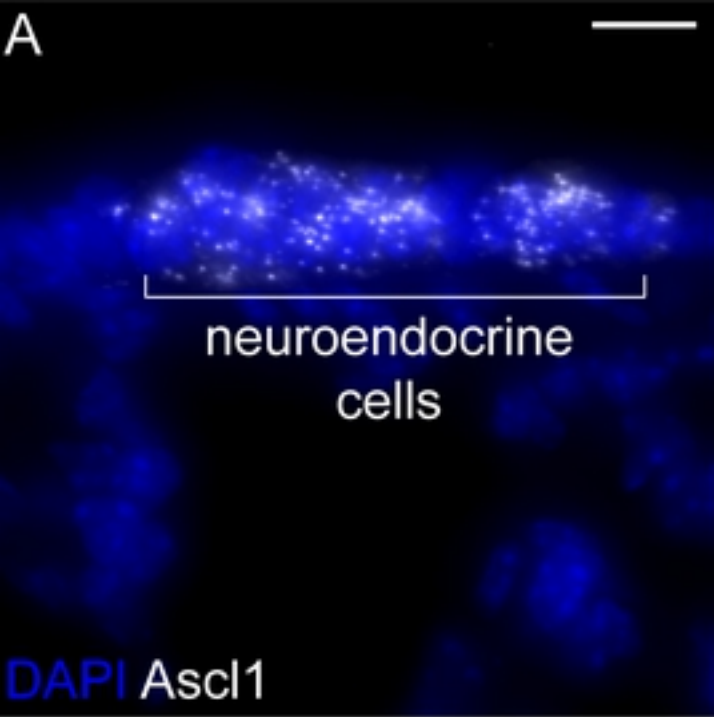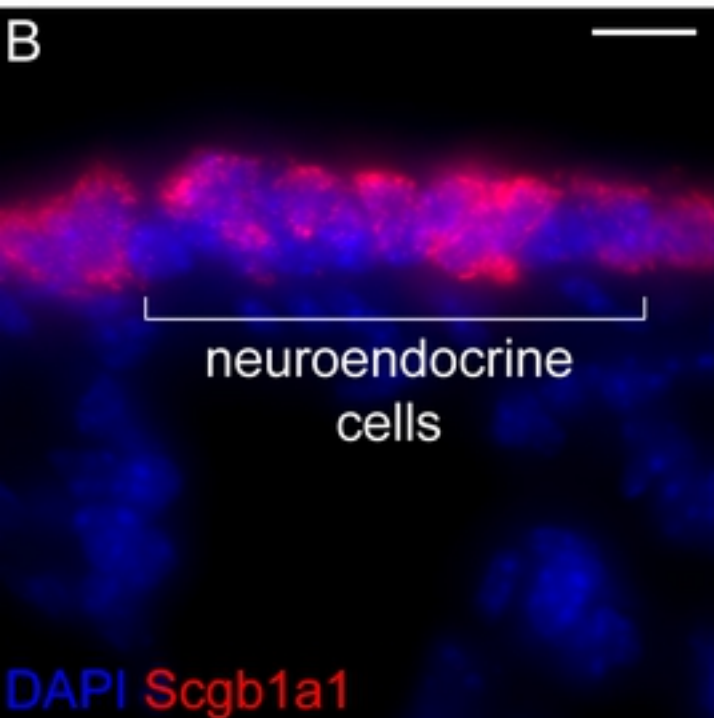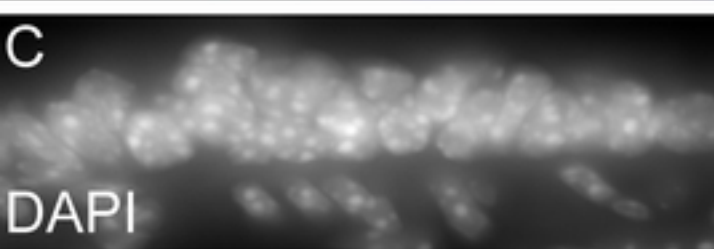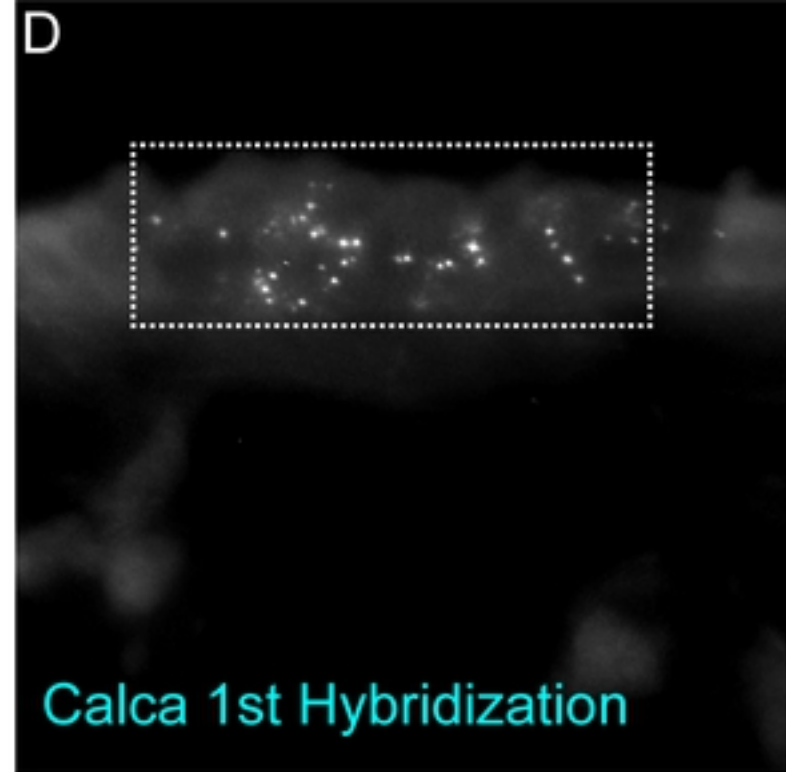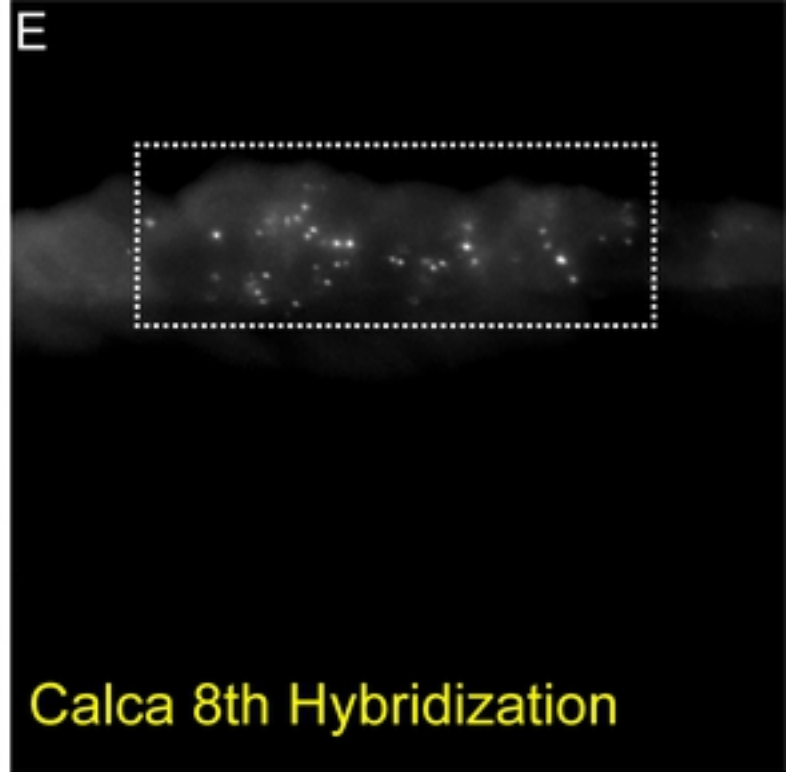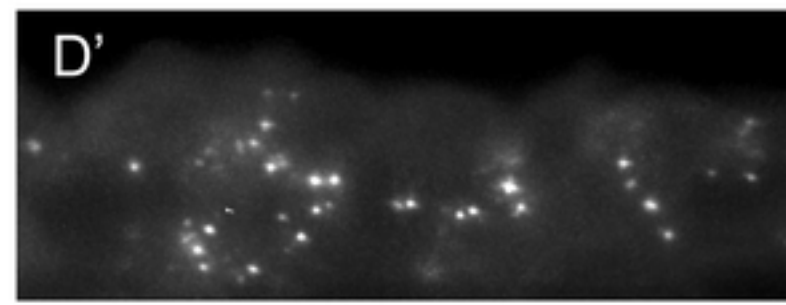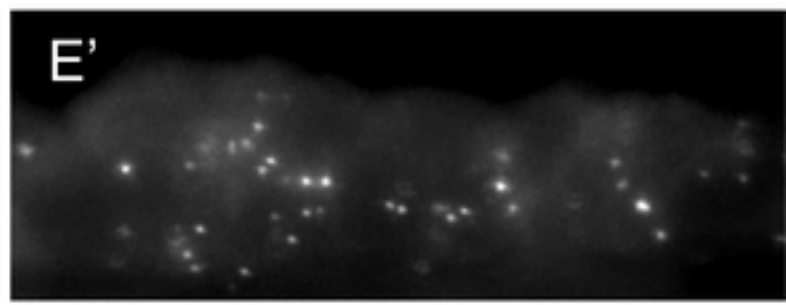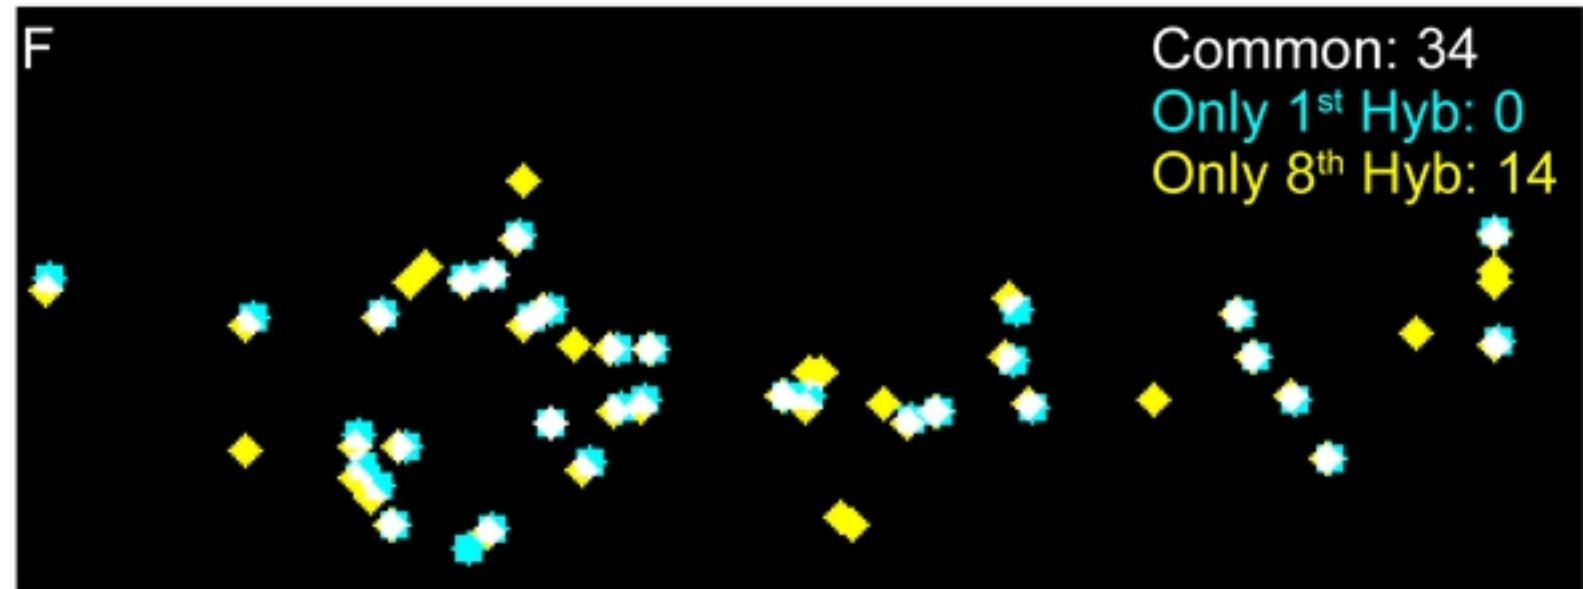

Suppl\_Figure\_4



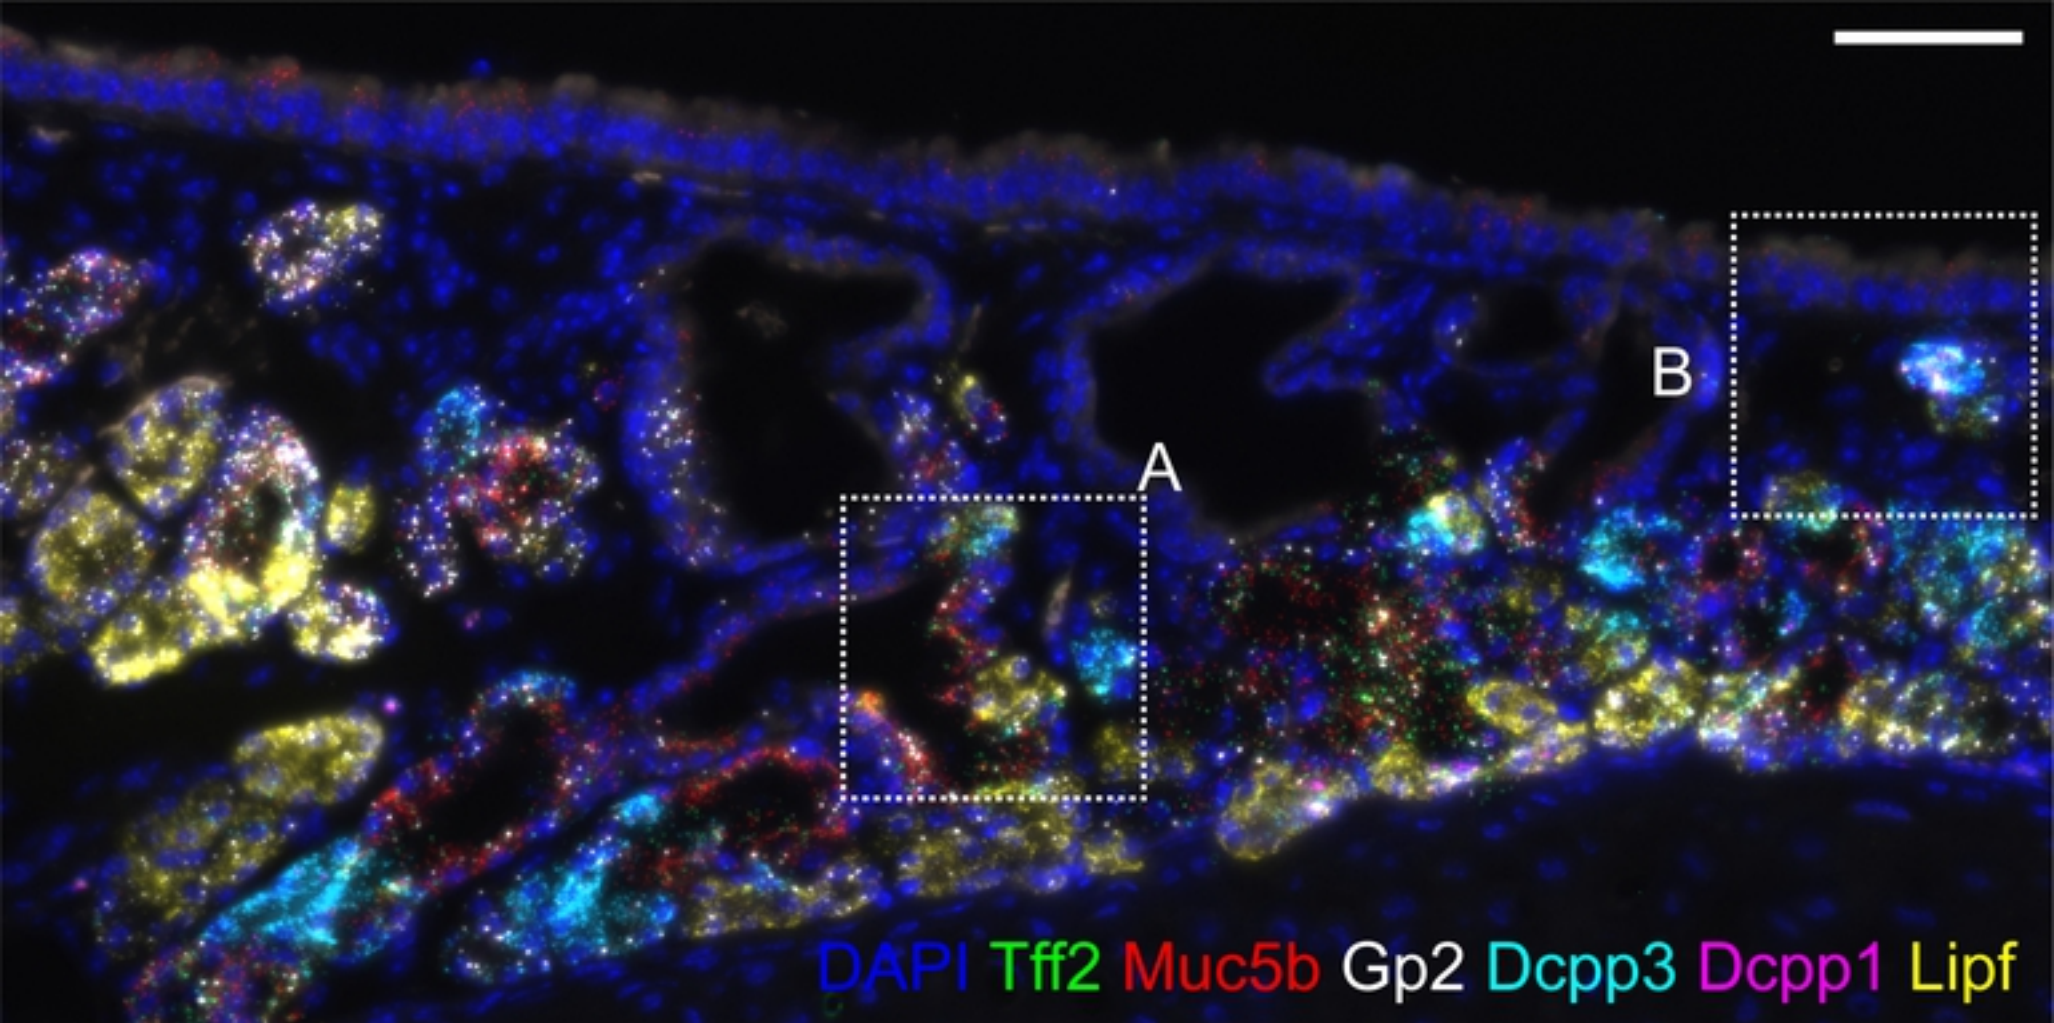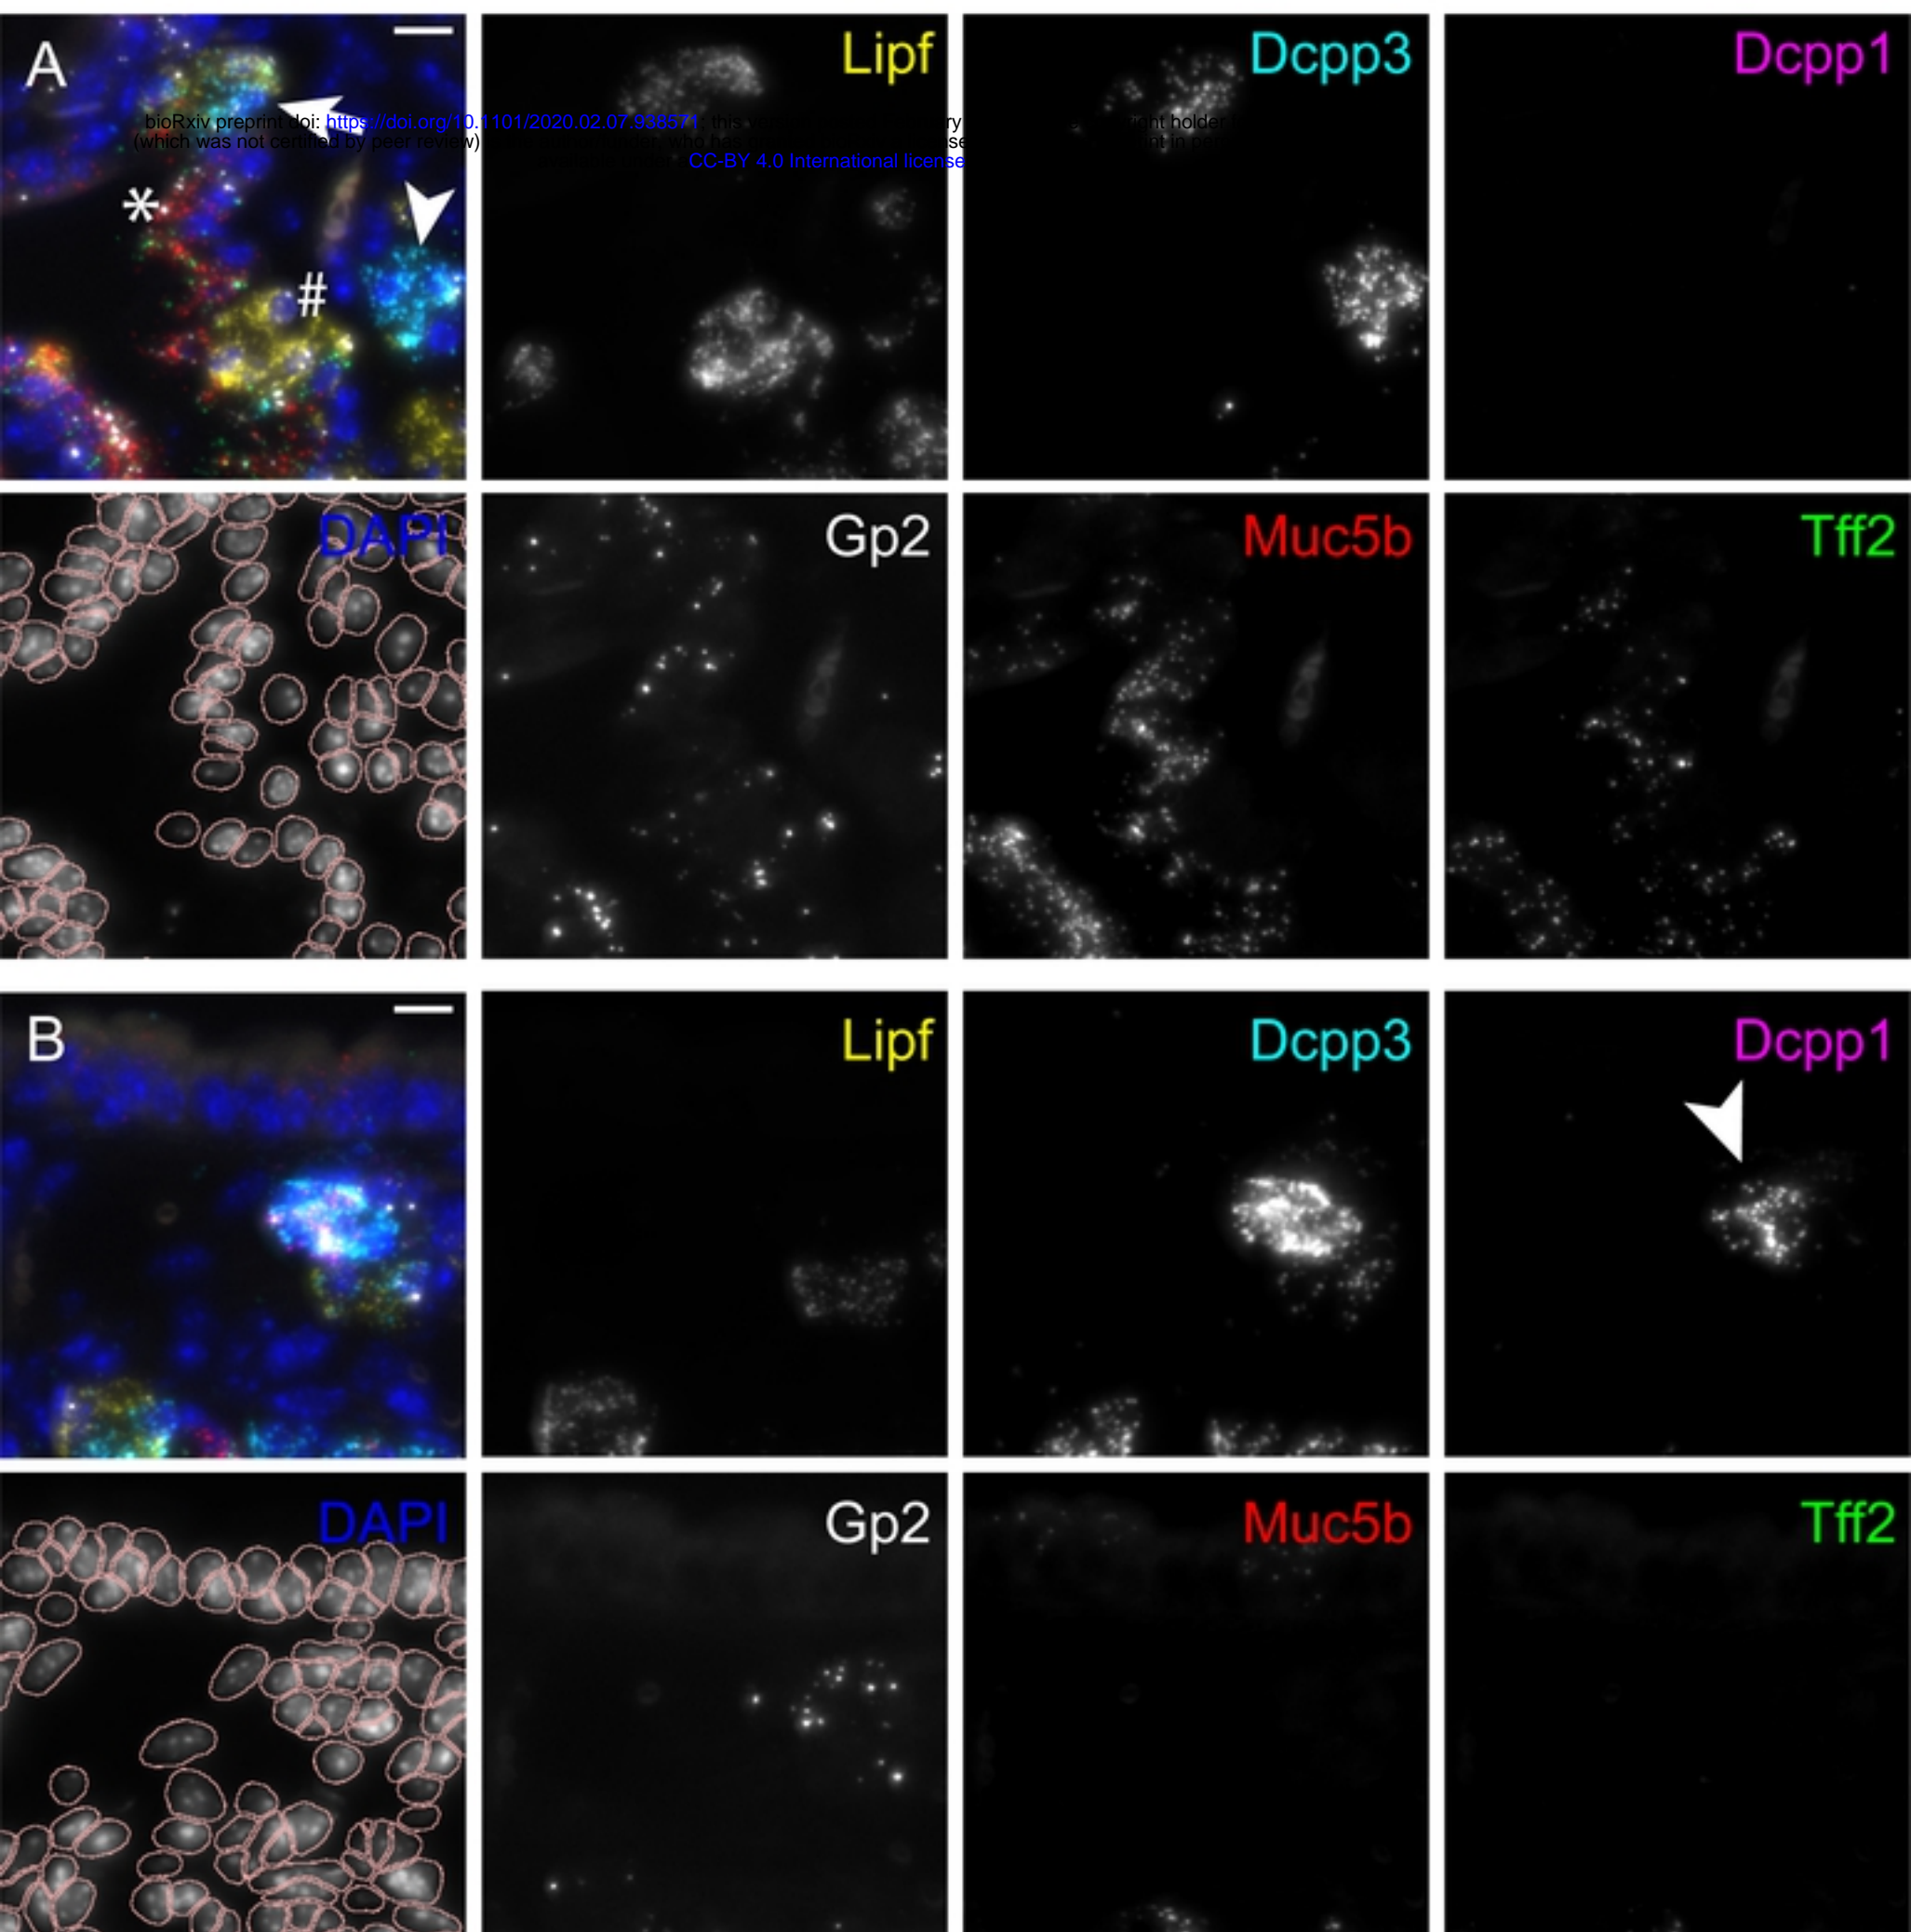

Suppl\_Figure\_5



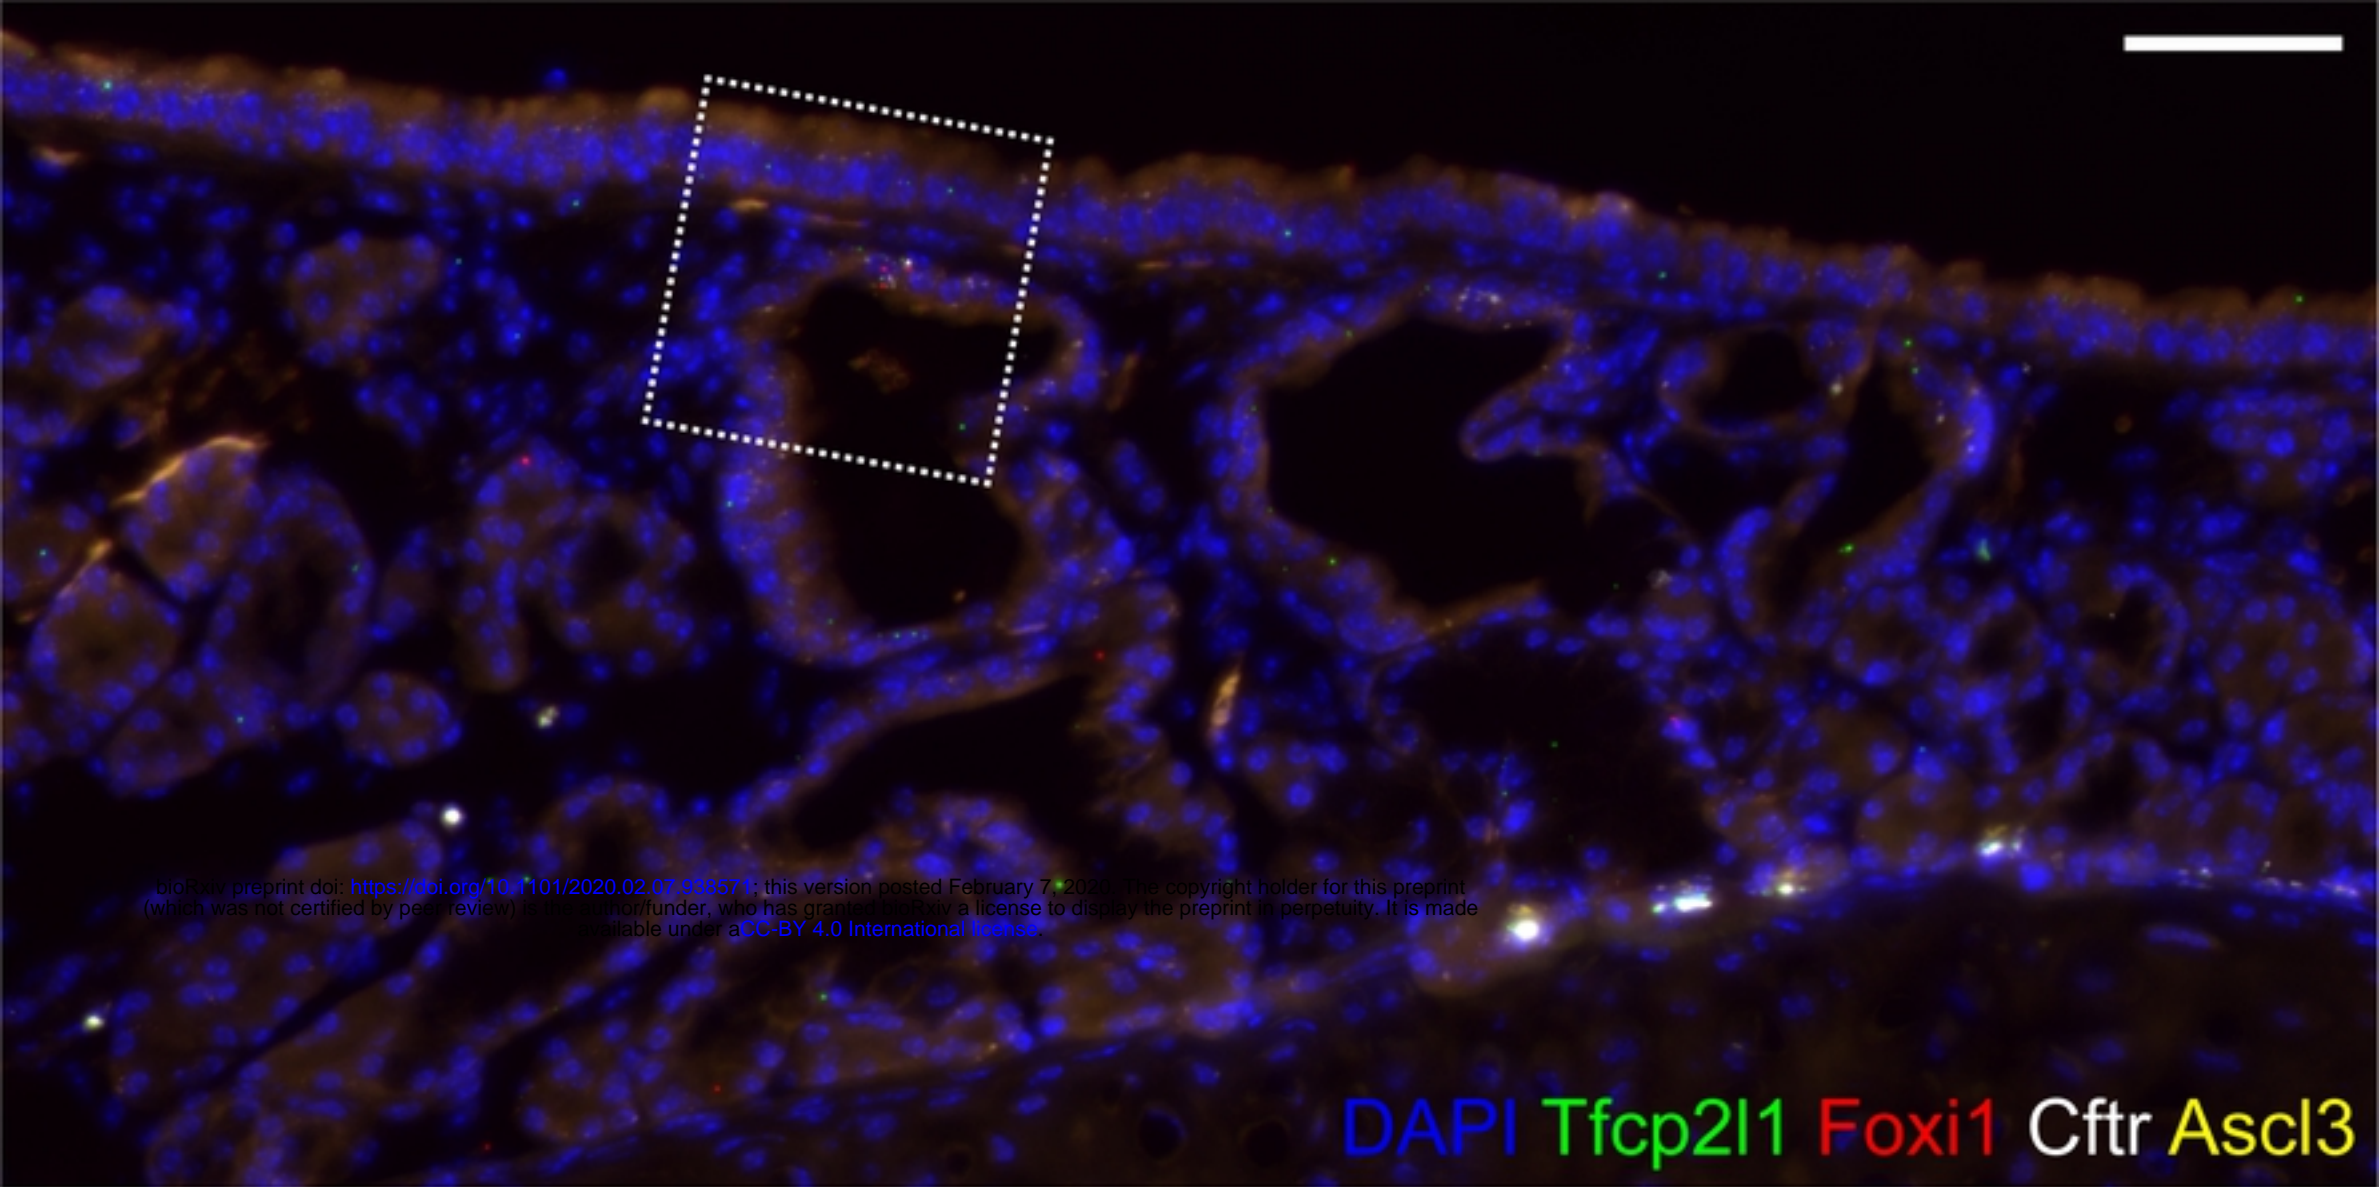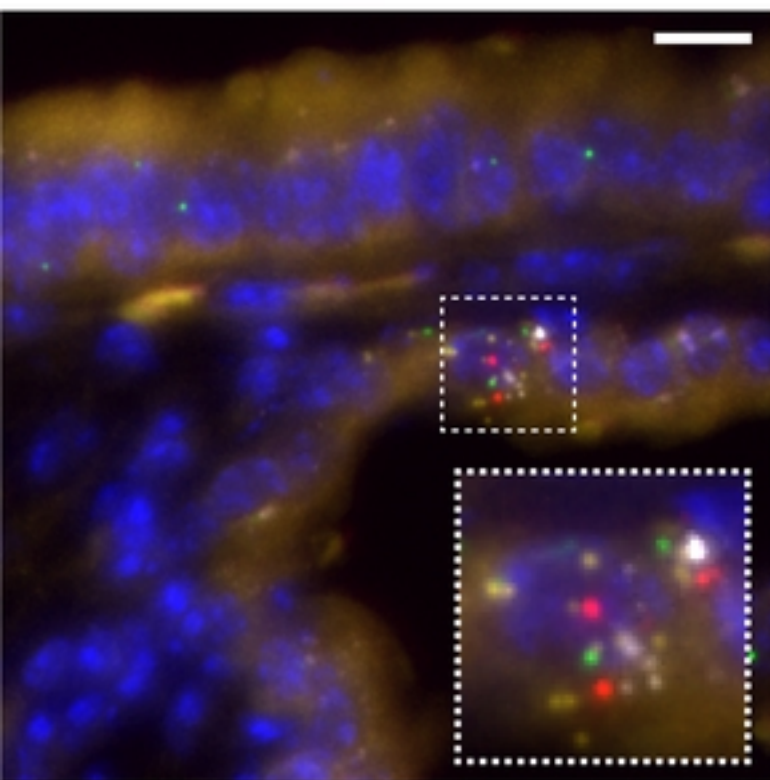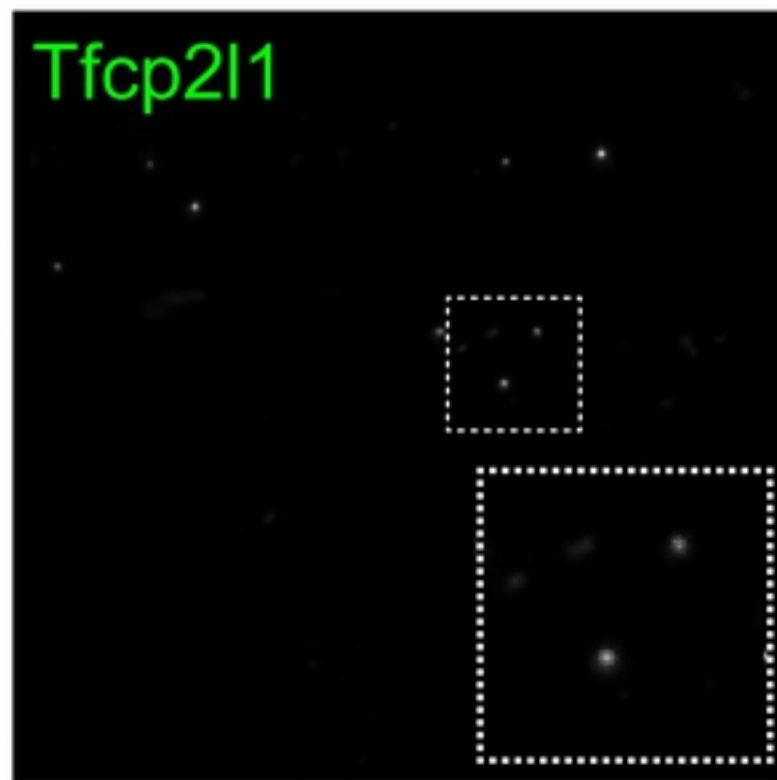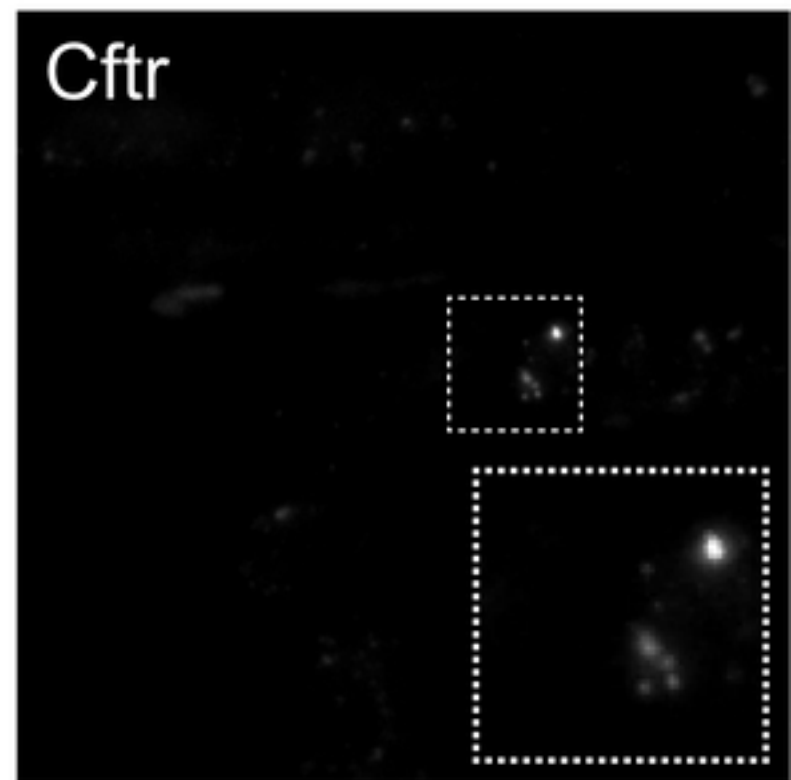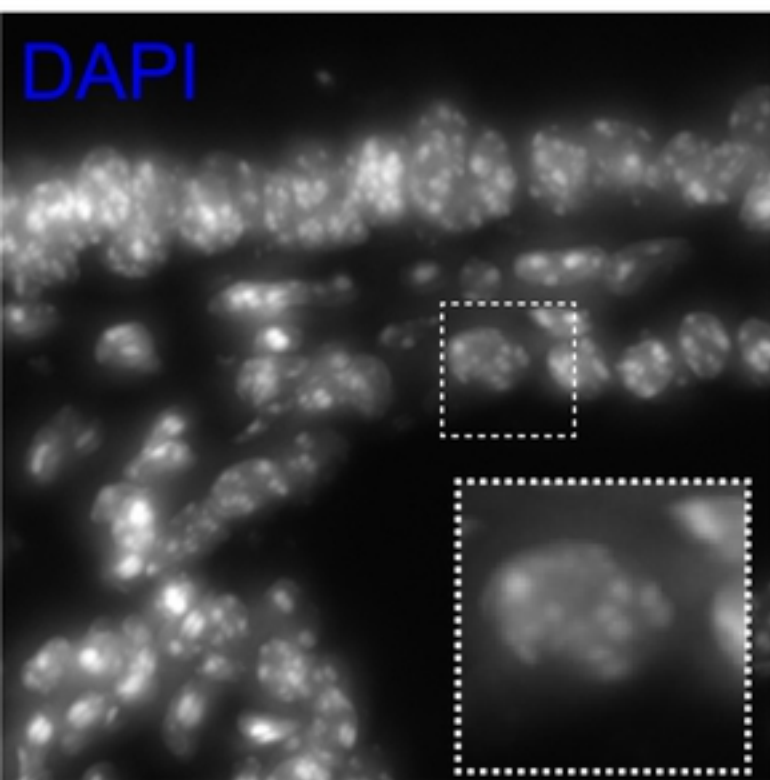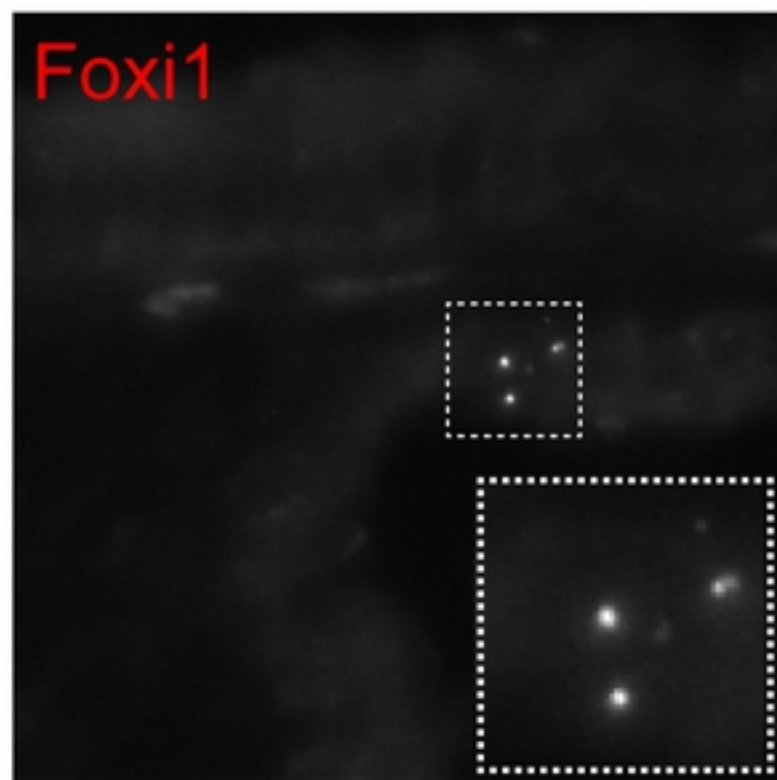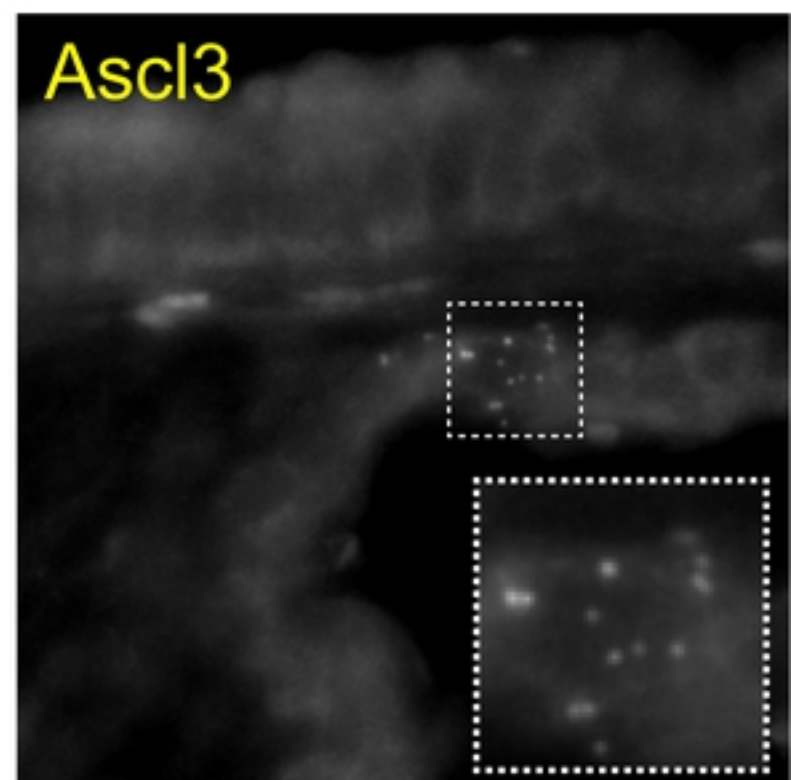

Suppl\_Figure\_6



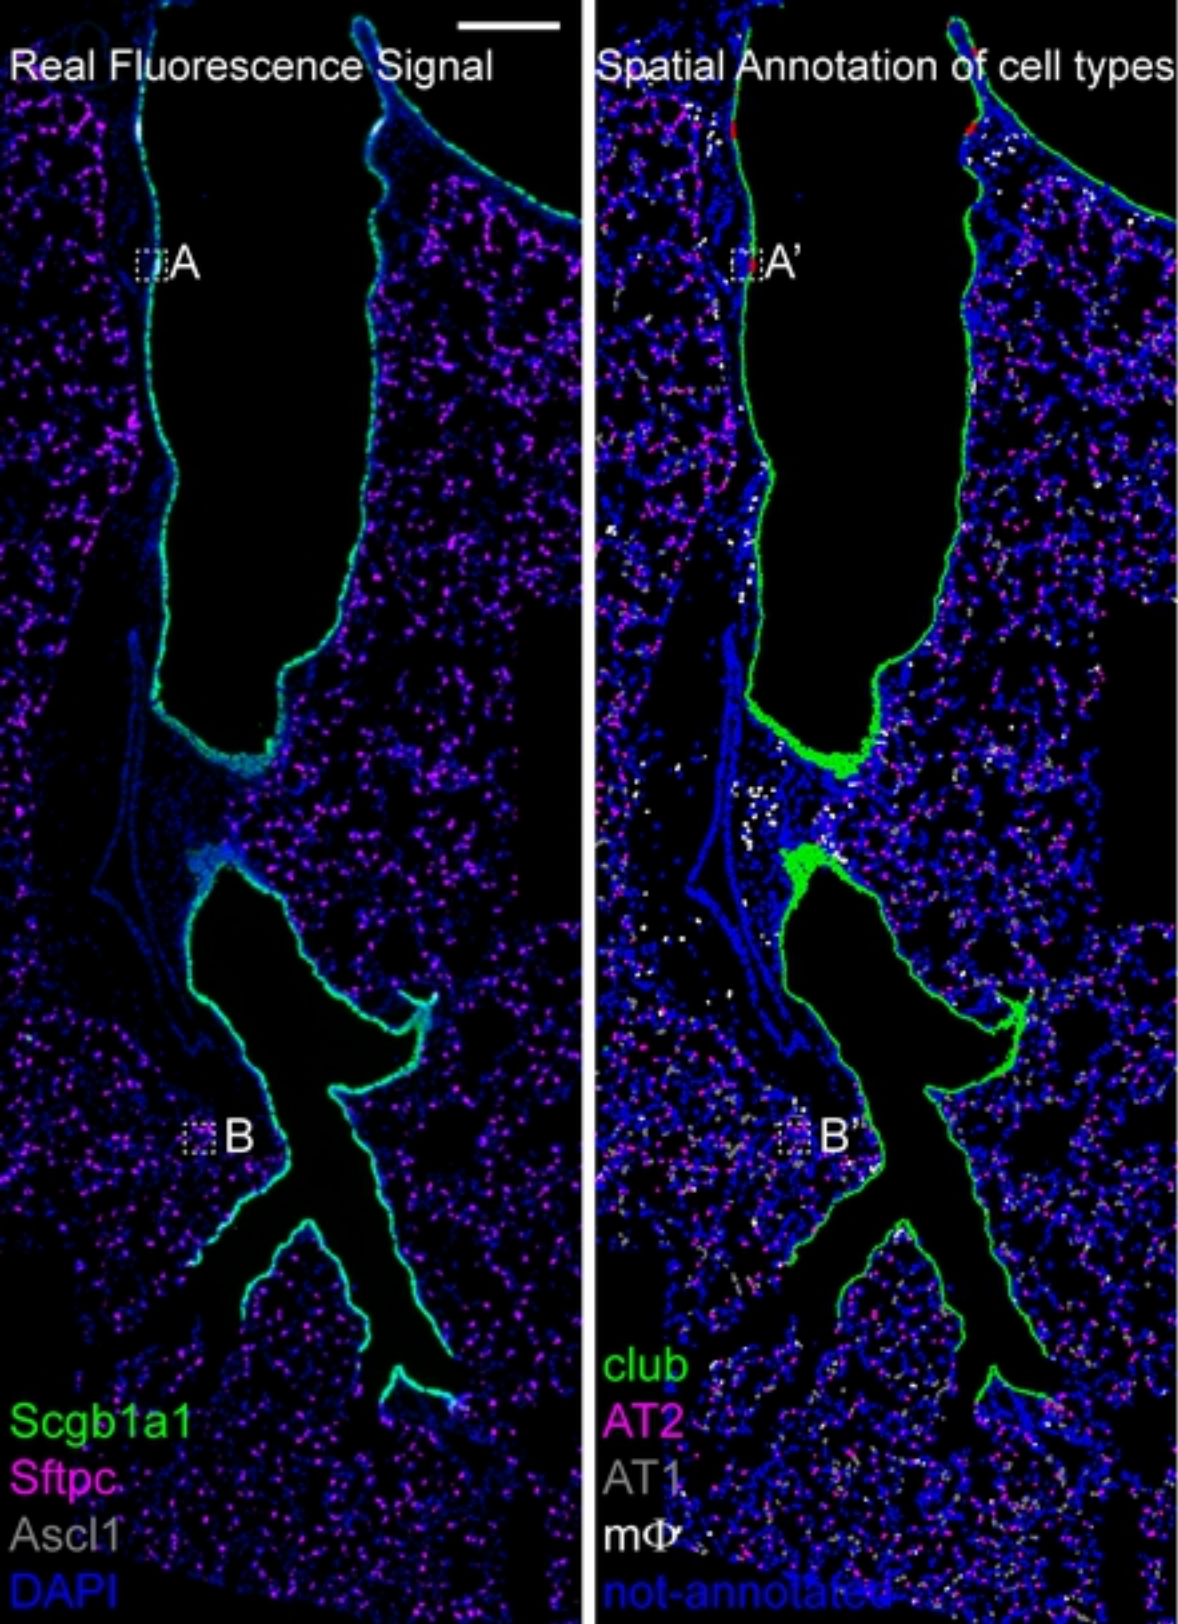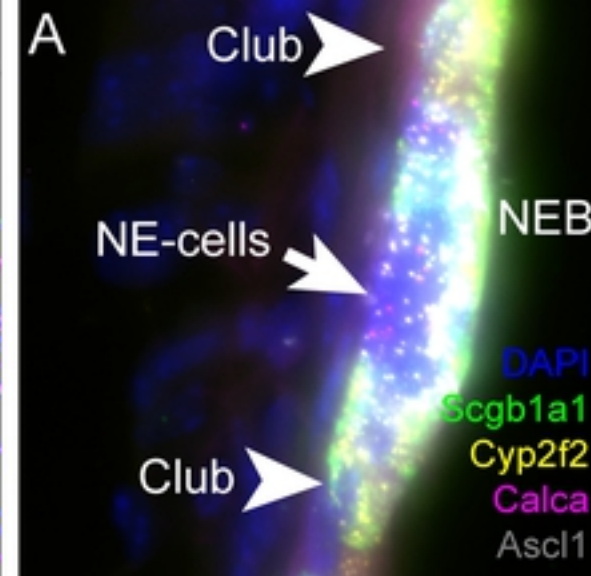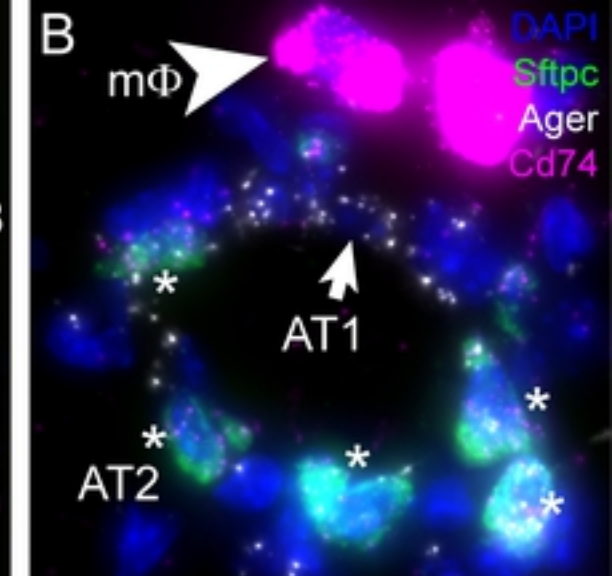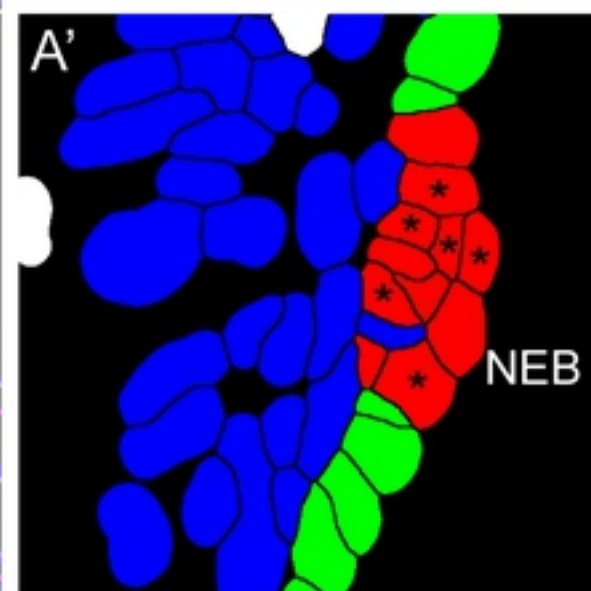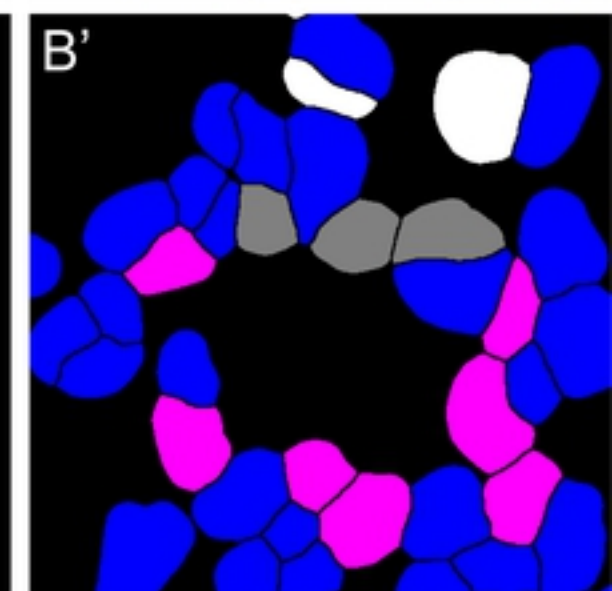

not annotated cells: blue

Club ( $Scgb1a1^{pos}$   $Cyp2f2^{pos}$   $Ascl1^{neg}$ ): green

NE ( $Ascl1^{pos}$ ): red (\*  $Calca=0$  dots)

AT2 ( $Sftpc^{pos}$   $Lyz2^{pos}$   $Cd74^{pos}$ ): magenta

AT1 ( $Ager^{pos}$  &  $Sftpc^{neg}$  &  $Scgb1a1^{neg}$ ): gray

Macrophages ( $Lyz2^{pos}$   $Cd74^{pos}$   $Sftpc^{neg}$ ): white



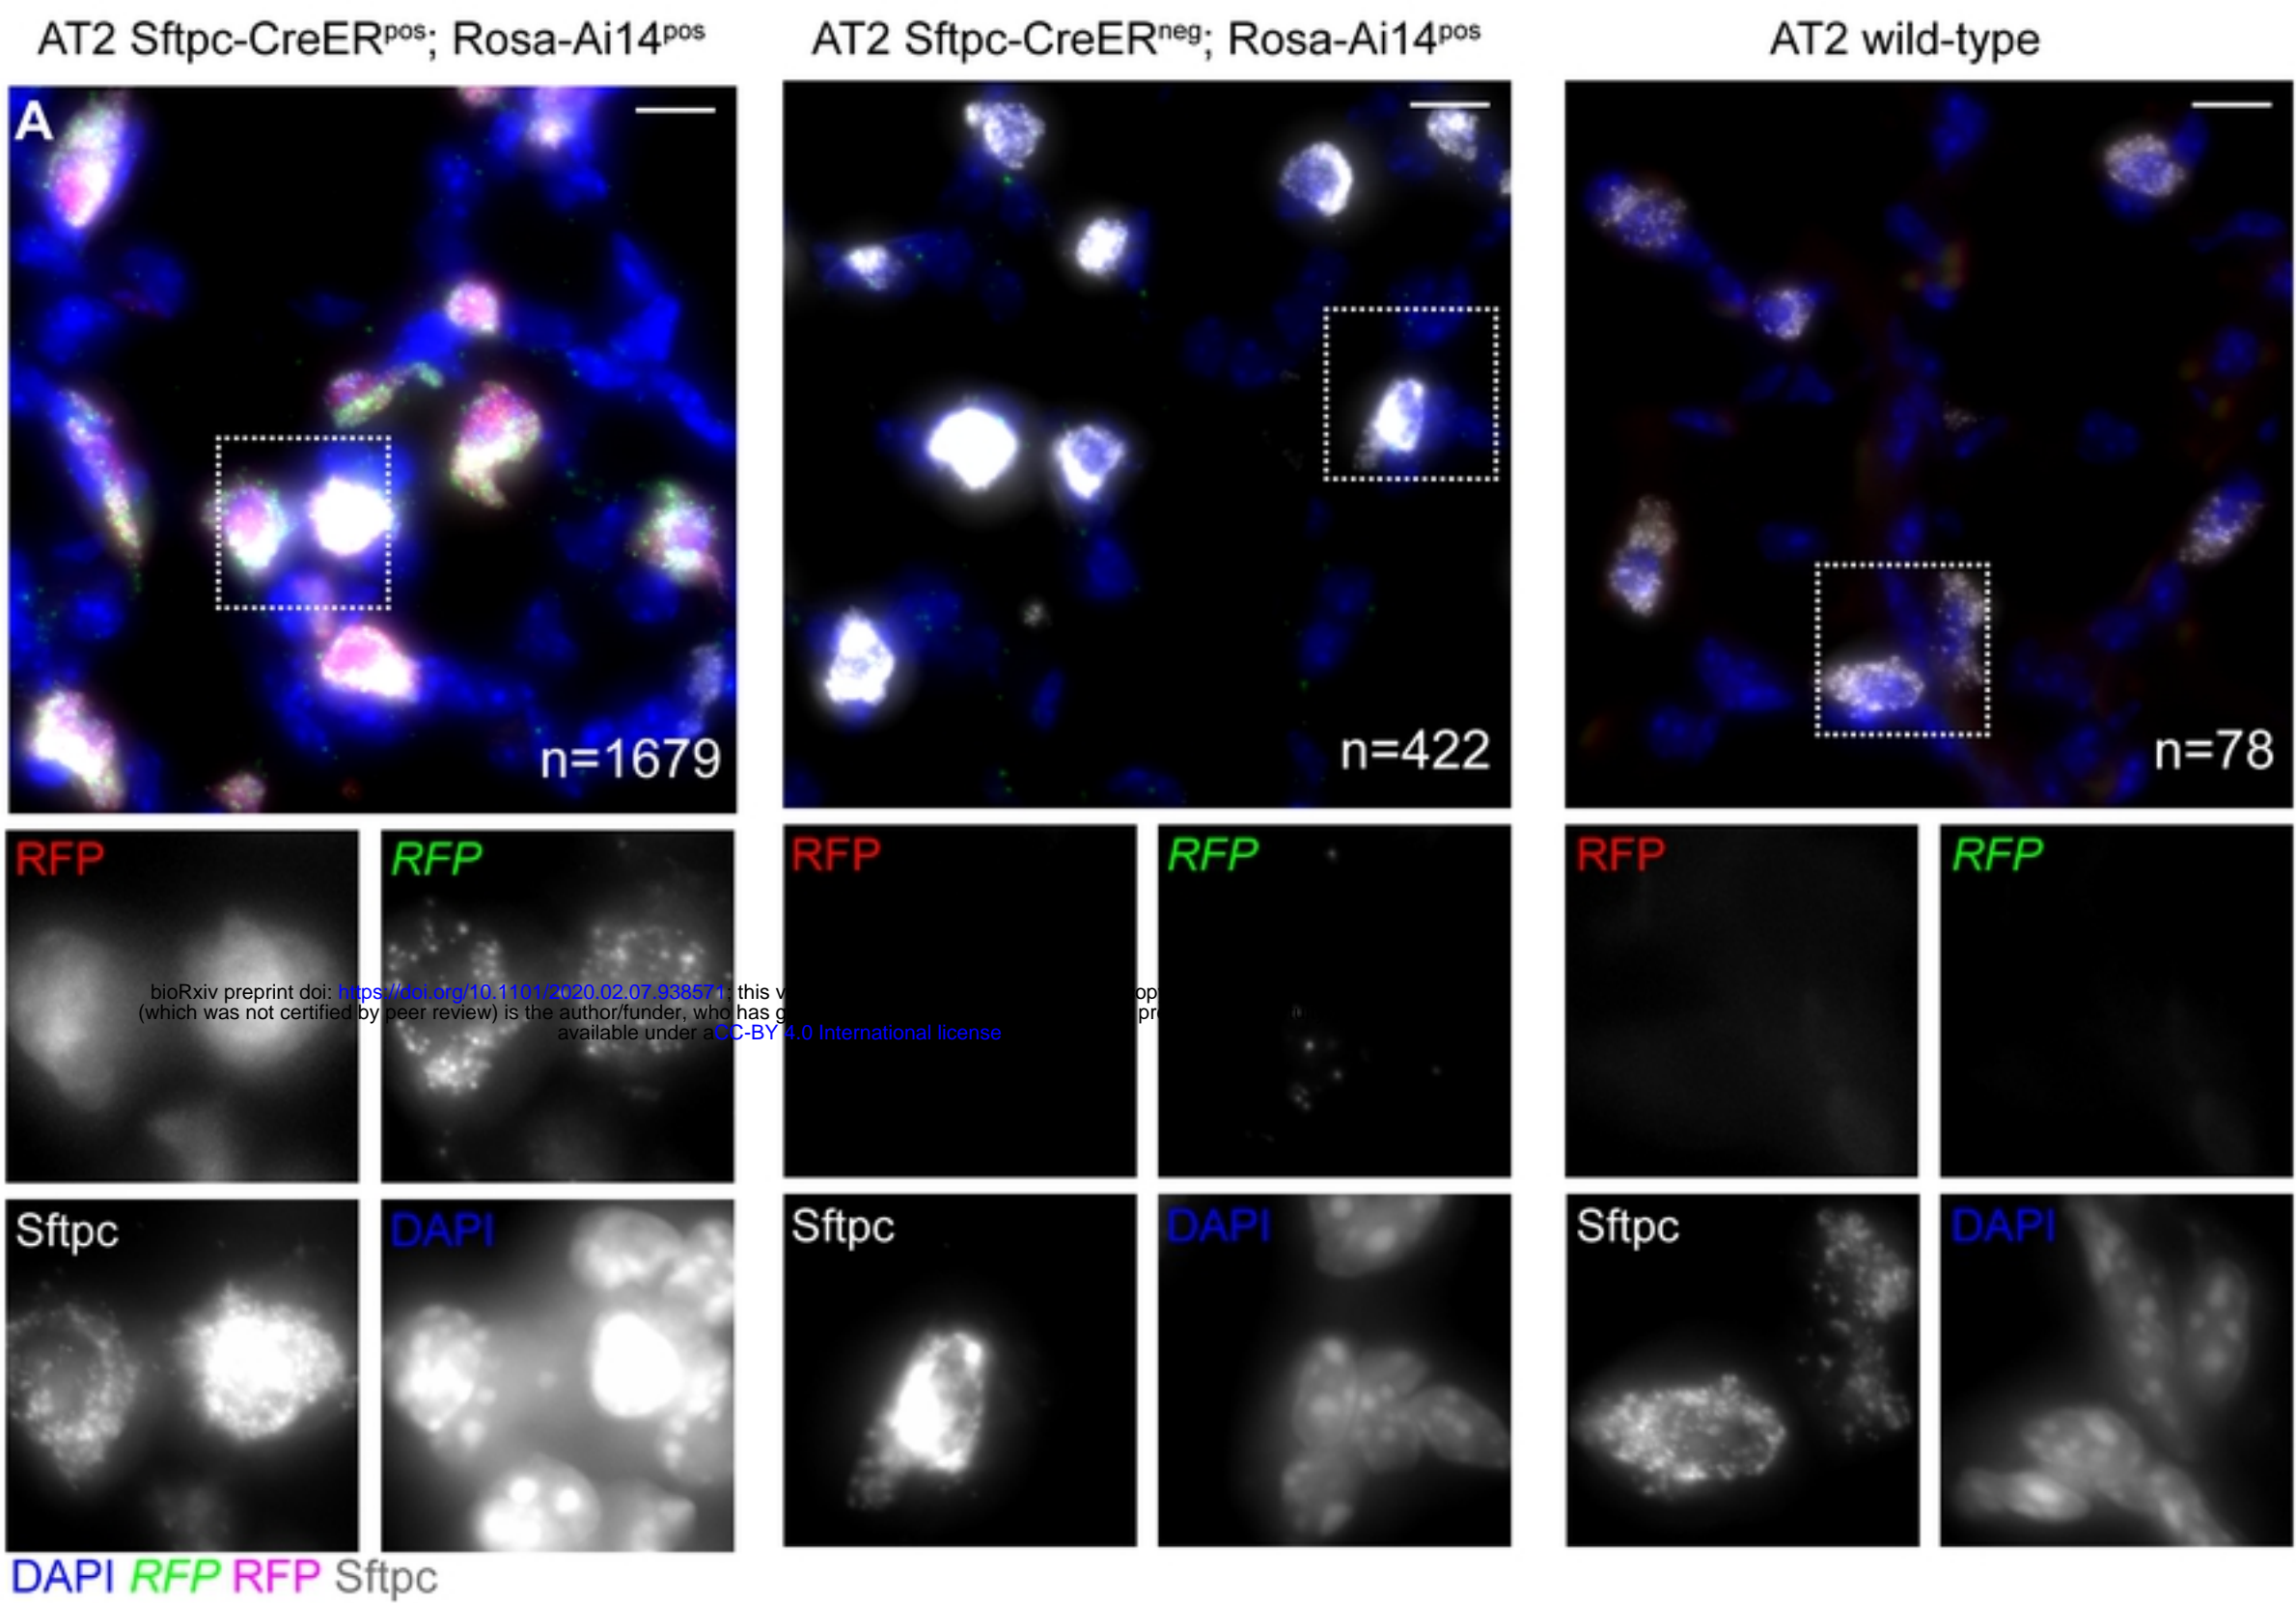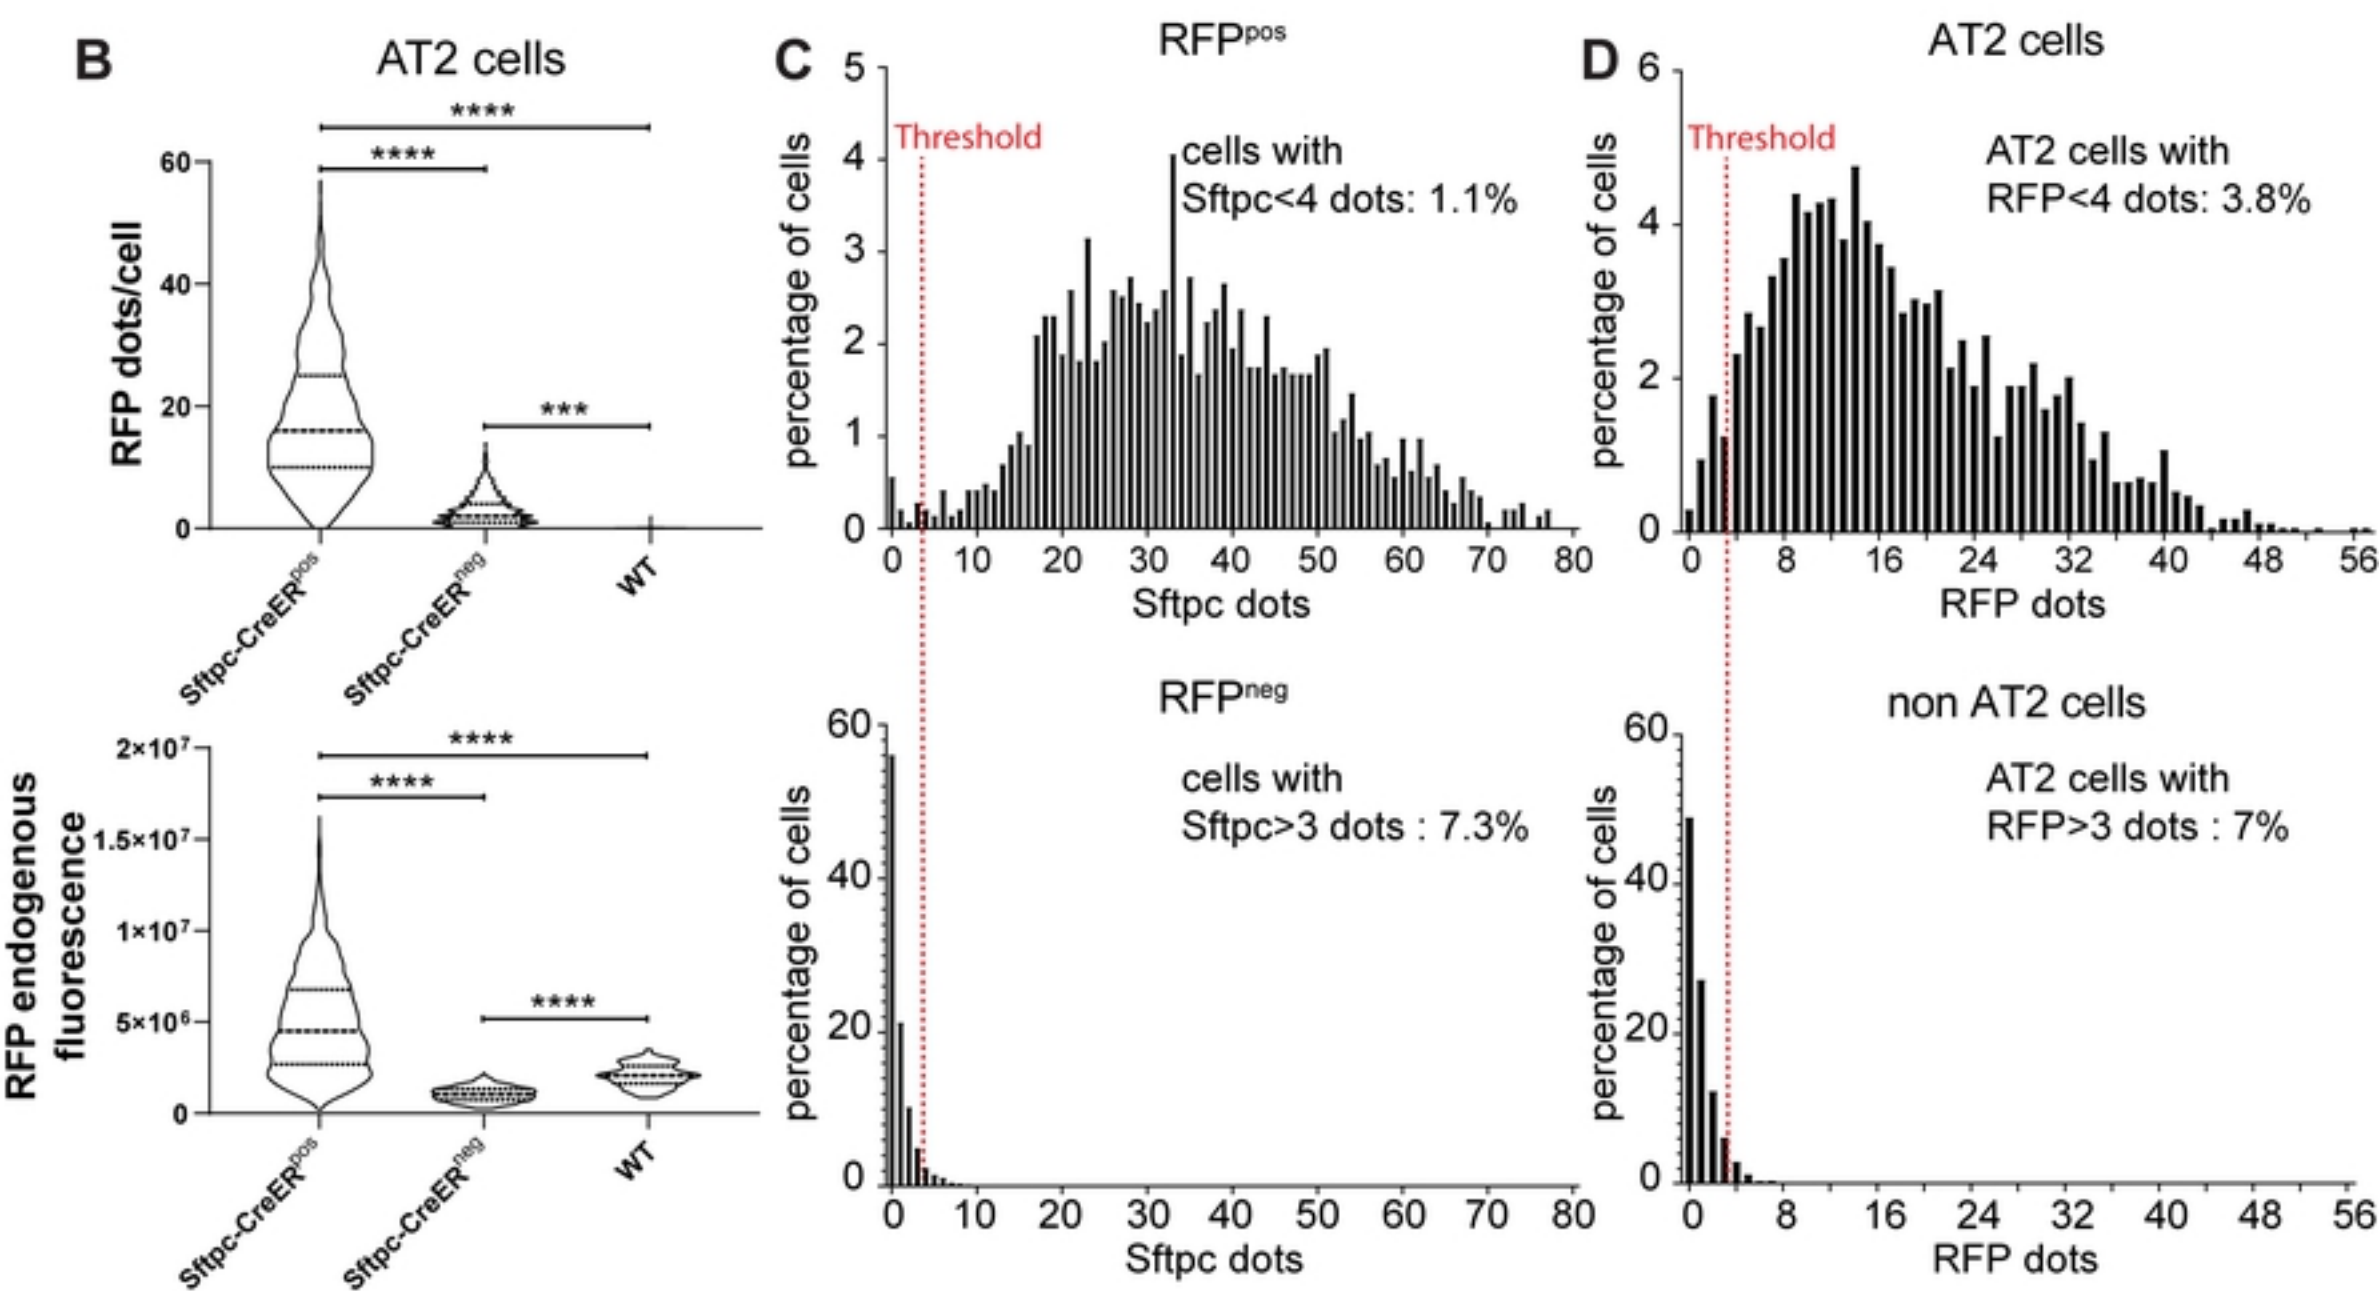

Figure\_5
